# Supplementary material for: Family planning and pregnancy issues for women with systemic inflammatory diseases: patient and physician perspectives
Source: PubMed Central journal article supplement — BMJ Open. 2014 Feb 5;4(2):e004081. doi: 10.1136/bmjopen-2013-004081 (PMC3918989; doi:10.1136/bmjopen-2013-004081), 2014-02-05
Supplement: bmjopen-2013-004081.draft_revisions.pdf [file bmjopen-2013-004081.draft_revisions.pdf]

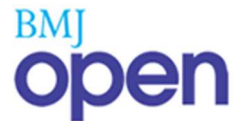

**Family Planning and Pregnancy Issues for Women with Systemic Inflammatory Diseases: Patient and Physician Perspectives**

|                                 |                                                                                                                                                                                                                                                                                                                                |
|---------------------------------|--------------------------------------------------------------------------------------------------------------------------------------------------------------------------------------------------------------------------------------------------------------------------------------------------------------------------------|
| Journal:                        | <i>BMJ Open</i>                                                                                                                                                                                                                                                                                                                |
| Manuscript ID:                  | bmjopen-2013-004081                                                                                                                                                                                                                                                                                                            |
| Article Type:                   | Research                                                                                                                                                                                                                                                                                                                       |
| Date Submitted by the Author:   | 25-Sep-2013                                                                                                                                                                                                                                                                                                                    |
| Complete List of Authors:       | Chakravarty, Eliza; Oklahoma Medical Research Foundation, Arthritis & Clinical Immunology Research Program, MS 50<br>Clowse, Megan; Duke University Medical Center,<br>Pushparajah, Daphnee; UCB Pharma,<br>Mertens, Sarah; UCB Pharma,<br>Gordon, Caroline; Birmingham University Medical School, Rheumatology Research Group |
| <b>Primary Subject Heading</b>: | Immunology (including allergy)                                                                                                                                                                                                                                                                                                 |
| Secondary Subject Heading:      | Rheumatology, Gastroenterology and hepatology, General practice / Family practice, Obstetrics and gynaecology, Patient-centred medicine                                                                                                                                                                                        |
| Keywords:                       | Pregnancy, Autoimmune disease, Inflammatory disease, Family Planning, Maternal medicine < OBSTETRICS                                                                                                                                                                                                                           |
|                                 |                                                                                                                                                                                                                                                                                                                                |

SCHOLARONE™  
Manuscripts

Only

1  
2  
3 **Family Planning and Pregnancy Issues for Women with Systemic Inflammatory**  
4 **Diseases: Patient and Physician Perspectives**  
5  
6  
7  
8

9 Eliza Chakravarty,<sup>1</sup> Megan E.B. Clowse,<sup>2</sup> Daphnee S. Pushparajah,<sup>3</sup> Sarah Mertens,<sup>3</sup> Caroline  
10 Gordon<sup>4</sup>  
11  
12

13  
14  
15  
16 <sup>1</sup>Oklahoma Medical Research Foundation, Oklahoma City, USA

17  
18 <sup>2</sup>Duke University Medical Center, Durham, USA

19  
20 <sup>3</sup>UCB Pharma, Brussels, Belgium

21  
22 <sup>4</sup>School of Immunity and Infection, College of Medical and Dental Sciences, University of  
23 Birmingham, Birmingham, UK  
24  
25  
26  
27

28  
29 **Correspondence to:**

Dr Eliza Chakravarty  
Arthritis & Clinical Immunology Research Program, MS 50  
Oklahoma Medical Research Foundation  
825 N.E. 13<sup>th</sup> Street  
Oklahoma City  
OK 73104  
USA  
Telephone: +1 (405) 271-6042  
Fax: +1 (405) 271-2319  
Email: Eliza-Chakravarty@omrf.org

30  
31  
32  
33  
34  
35  
36  
37  
38  
39  
40  
41  
42 **Key Words**

43  
44  
45 Autoimmune Disease, Inflammatory Disease, Pregnancy, Family Planning  
46  
47  
48

49 **Word Count:** 4,139  
50  
51  
52

53  
54 **Funding Statement**

55  
56 This work was supported by UCB Pharma  
57  
58  
59  
60

### **Competing Interests Statement**

EC has previously been reimbursed by UCB Pharma for consultation services; MEBC has previously been reimbursed by UCB Pharma for consultation services; DSP is an employee of UCB Pharma; SM is an employee of UCB Pharma; CG declared no competing interests.

### **Author Contributions**

EC: substantial contribution to conception and design, interpretation of data, drafting and critical revision of the manuscript, and final approval of the manuscript for submission.

MEBC: substantial contribution to conception and design, interpretation of data, drafting and critical revision of the manuscript, and final approval of the manuscript for submission.

DSP: substantial contribution to conception and design, interpretation of data, drafting and critical revision of the manuscript, and final approval of the manuscript for submission.

SM: substantial contribution to conception and design, acquisition, analysis and interpretation of data, critical revision of the manuscript, and final approval of the manuscript for submission.

CG: substantial contribution to conception and design, interpretation of data, drafting and critical revision of the manuscript, and final approval of the manuscript for submission.

**Abstract**

**Objectives:** To identify family planning and pregnancy (FPP) issues for female patients of child-bearing age living with a chronic inflammatory disease and to assess whether current clinical practice routinely provides adequate support to alleviate these concerns.

**Setting:** Multinational survey and an analysis of online patient activity.

**Participants:** Premenopausal women (aged 20-45 years of age; N=969) were surveyed in USA, UK, Germany, France, Italy and Spain. Rheumatologists were surveyed in Germany (N=50), France (N=50), Italy (N=50) and the USA (N=100) and gastroenterologists were also surveyed in the USA (N=100).

**Primary and Secondary Outcome Measures:** Two online surveys were undertaken to identify FPP issues for both physicians and patients. The surveys examined the frequency of dialogue on these topics between physicians and patients, alongside assessment of patient satisfaction regarding these conversations. Online analysis identified key themes for patient discussion outside their doctors' office/clinic/surgery.

**Results:** 32-56% of physicians spontaneously reported having talked about FPP with their female patients of child-bearing age. When prompted, the majority of rheumatologists (74-92%) and gastroenterologists (74%) reported having discussed conception/pregnancy with female patients; however, less than half reported consulting their patient's treating GP/gynaecologist about these topics.

1  
2  
3 The majority of patients reported their FPP-related concerns are not adequately  
4  
5 addressed/settled during their medical appointments. Furthermore, only 30-40% of patients  
6  
7 considered advice/information to be consistent across multiple healthcare professionals.  
8  
9

10  
11 Key online FPP-related patient discussions included: disease state, adverse effects,  
12  
13 treatment, switch behaviour and wash-out requirements.  
14  
15

16  
17  
18 **Conclusions:** Female patients who live with chronic inflammatory disease have important  
19  
20 FPP concerns. The majority of patients, however, do not feel that their FPP concerns are  
21  
22 adequately addressed in current clinical practice and report that they receive inconsistent  
23  
24 advice from the various healthcare professionals who manage different aspects of their care.  
25  
26 There is a clear need for provision of up-to-date and consistent information/support to  
27  
28 female patients.  
29  
30  
31  
32  
33  
34  
35  
36  
37  
38  
39  
40  
41  
42  
43  
44  
45  
46  
47  
48  
49  
50  
51  
52  
53  
54  
55  
56  
57  
58  
59  
60

## Article Summary

### Article Focus:

- To identify key family planning and pregnancy (FPP) issues for female patients of child-bearing age who live with a chronic inflammatory disease and to assess whether current clinical practice routinely provides adequate support to alleviate these concerns.

### Key Messages:

- Female patients of child-bearing years wish to discuss FPP issues in relation to their disease with their physicians but the majority of female patients who live with chronic inflammatory disease feel that their concerns are not adequately addressed.
- Physicians should initiate discussion of FPP issues with their female patients, particularly those receiving immunosuppressive treatment up to the ages of 50, and establish their expectations and concerns.
- Treating physicians should work to maintain this dialogue, at least once per year or when treatment changes, and align the advice offered to their female patients of child-bearing age with that from other physicians involved in their care.

### Strengths and Limitations:

- Strengths: investigation of both patient and physician perspectives, involvement of specialists from different areas of interest and cross-cultural investigation.
- Limitations: absence of formal survey validation, reliance upon patient self-reporting, complications associated with delivery of the survey in local languages and possible bias in netnography research due to regional differences in language usage.

## Introduction

Autoimmune and inflammatory diseases often affect women of reproductive age. Although RA becomes more common as patients age,<sup>1</sup> women are increasingly choosing to start their family later in life and treatments to control RA are now often started at a younger age. Moreover, even though only a minority proportion of RA patients are women of child-bearing age,<sup>2</sup> the high prevalence of the disease means that it does impact a significant number of young women. Many other inflammatory diseases, including ankylosing spondylitis (AS),<sup>3 4</sup> Crohn's disease (CD),<sup>5 6</sup> inflammatory bowel disease (IBD)<sup>7</sup> and systemic lupus erythematosus (SLE),<sup>8</sup> also affect a younger population and thus have a direct effect on women of child-bearing age.

Pregnancy and child rearing are important facets of life for most women. Now that improved therapies for inflammatory diseases have enabled better physical function and quality of life, many women who previously would have felt too ill to consider child-bearing are now better able to fulfil desires for family life. Family planning and pregnancy (FPP) are also important issues for this patient population as multiple studies have linked these disease states to a decreased chance of conceiving,<sup>9</sup> carrying to full term<sup>10</sup> and increasing the risk of other potential complications.<sup>11-13</sup> Due to this impact on pregnancy outcomes, expert advice is to achieve and maintain stable low disease activity prior to conception and throughout pregnancy.<sup>14-16</sup> Some anti-inflammatory treatment options can be potentially hazardous for pregnant women to take as drugs can pass across the placenta and may affect the foetus.<sup>17</sup> Methotrexate, a common RA treatment, can be damaging to foetal development (at least at high doses)<sup>18 19</sup> whilst other disease-modifying anti-rheumatic drugs such as leflunomide have been shown to cause malformations in animal studies.<sup>20</sup>

1  
2  
3 However, use of medications during pregnancy is not always contraindicated and an  
4 individual risk-benefit discussion should be undertaken between the patient and expert  
5 physician to provide the best management of both the disease and the pregnancy.<sup>21</sup>  
6  
7

8  
9 Inadequate dissemination of appropriate advice describing which drugs may be continued  
10 can lead to women unnecessarily forgoing potentially helpful medications and thus suffering  
11 throughout pregnancy, with the increased risk of further complications to both mother and  
12 child due to the effects of active disease.<sup>22</sup> Furthermore, patients are increasingly seeking  
13 additional information on the internet,<sup>23</sup> while a recent analysis of information regarding  
14 medication safety on active internet sites has noted an inadequate evidence base for the  
15 advice often provided and inconsistent guidance.<sup>24</sup> It is clear that communication of reliable  
16 and consistent information is required to enable the correct treatment of these women  
17 before and during pregnancy, and while breast-feeding. Education and information should  
18 be shared by healthcare professionals dealing with these diseases, medications and  
19 situations on a daily basis. Accurate, consistent information must be communicated to  
20 women considering or entering pregnancy in order to support patients through this delicate  
21 journey.  
22  
23  
24  
25  
26  
27  
28  
29  
30  
31  
32  
33  
34  
35  
36  
37  
38

39 Two surveys were undertaken to investigate some of these issues, one of physicians and  
40 another of female patients, to identify the key concerns of both groups related to the topics  
41 of FPP in inflammatory disease. The surveys were designed to gauge whether there is a gap  
42 in the communication between what healthcare professionals provide in terms of  
43 information/support and what patients feel that they receive. The patient survey also  
44 investigated where patients go to seek additional information. Two key objectives of the  
45 study were to examine the proportion of physicians who discuss FPP issues with their female  
46 patients of child-bearing age and the proportion of patients who have discussed these  
47 topics, in the context of their condition, with their healthcare professional. The survey also  
48  
49  
50  
51  
52  
53  
54  
55  
56  
57  
58  
59  
60



1  
2  
3 assessed the proportion of patients who feel that their concerns on this topic have been  
4 satisfactorily addressed by these discussions. Here we aim to communicate the insights  
5 gained from this investigation to clinicians treating women of child-bearing age, who live  
6 with chronic inflammatory conditions, in order to provide advice on how best to support  
7 these patients.  
8  
9  
10  
11  
12

## 13 **Methods**

### 14 *Physician Survey*

15  
16 The online physician questionnaire was delivered in two phases, the first phase (baseline)  
17 was distributed in July 2012 (Europe) and September 2012 (USA), and the second phase  
18 was distributed in November 2012 in both Europe and USA. The survey was delivered in the  
19 local language and translations were checked for consistency against the original in English  
20 by native speakers with fluency in both languages (the complete Physician Questionnaire  
21 can be found online in Appendix 1). The questionnaire was designed to elicit both  
22 spontaneous (open-ended question) and prompted (closed question in which FPP topics  
23 were an option among other answering categories) responses. Participants were recruited  
24 from the WorldOne Physician Panel. Rheumatologists were surveyed in four countries:  
25 Germany (N=50), France (N=50), Italy (N=50) and the USA (N=100). Gastroenterologists  
26 were surveyed in the USA (N=100). Responses were compared between phases using two-  
27 sided z-tests with significance level 0.05, which corresponds to a confidence interval of 95%.  
28  
29  
30  
31  
32  
33  
34  
35  
36  
37  
38  
39  
40  
41  
42  
43  
44  
45  
46  
47

48 Participating physicians had to meet the following criteria: 3 to 30 years of experience,  
49 ≥50% patient-facing time, had not participated in medical research within their specialist  
50 area in the past month, were not currently a clinical investigator for a pharmaceutical  
51 manufacturer and were not currently active in medical research or advertising. Physicians  
52 with Rheumatology as their primary specialty had to meet the following additional criteria:  
53  
54  
55  
56  
57  
58  
59  
60

1  
2  
3 treat  $\geq 20$  RA patients per month and have  $\geq 10$  patients on biologics per month. Physicians  
4  
5 with Gastroenterology as their primary specialty had to meet the following additional  
6  
7 criteria: treat  $\geq 8$  CD patients per month and have  $\geq 2$  patients on biologics per month.  
8  
9

### 10 11 *Patient Survey*

12  
13 The online patient questionnaire was designed according to standard market research  
14  
15 survey methodology, including scaling questions and avoiding skewed questions. The  
16  
17 questionnaire was delivered in the local language and translations were checked for  
18  
19 consistency against the original in English by native speakers with fluency in both languages  
20  
21 (the complete Patient Questionnaire can be found online in Appendix 2). The questionnaire  
22  
23 was targeted at premenopausal women (age was self-declared and the survey excluded  
24  
25 women under 20 and over 45 years of age; see Question 3 Patient Survey). A professional  
26  
27 recruitment agency was used to recruit patients.  
28  
29

30  
31  
32 The patient questionnaire was delivered in two phases and was distributed in six countries  
33  
34 (USA, UK, Germany, France, Italy and Spain). The first phase (baseline) consisted of 16  
35  
36 questions and was disseminated to patients between 17<sup>th</sup> July and 15<sup>th</sup> August 2012. There  
37  
38 were 1,069 respondents to the first phase which covered patients with RA, SLE, CD and  
39  
40 ulcerative colitis (UC). The second phase consisted of the original 16 questions from the first  
41  
42 phase plus an additional 8 questions included in order to avoid so-called 'false positives' (i.e.  
43  
44 covered topics included in other questions to test consistency of response) and to provide  
45  
46 greater insight into patients' experience in terms of medical care and needs. The second  
47  
48 phase elicited 969 responses and was distributed between 13<sup>th</sup> October and 16<sup>th</sup> November  
49  
50 2012 to patients with axial spondyloarthritis (axSpA) and psoriatic arthritis (PsA), in addition  
51  
52 to RA, SLE, CD and UC patients. All responses were anonymous. The patients who were  
53  
54 invited to participate in the two survey phases were not identical, although there may have  
55  
56  
57  
58  
59  
60

1  
2  
3 been some overlap (responses were anonymous therefore the extent of overlap could not be  
4  
5 determined).

### 6 7 8 9 *Netnography Research*

10  
11 Online discussions (English language only) relating to FPP issues were investigated using  
12  
13 two approaches: social media monitoring, and search engine landscape/content analysis  
14  
15 (SELA).  
16

17  
18  
19  
20 Social media monitoring was undertaken by identifying categories of interest (defined as:  
21  
22 'ulcerative colitis', 'systemic lupus erythematosus', 'rheumatoid arthritis', 'colitis ulcerosa',  
23  
24 'lupus', 'regional enteritis', 'Crohn's disease') and keywords of interest (defined as:  
25  
26 'pregnancy', 'miscarriage', 'birth control', 'miscarriages', 'fertile', 'family planning', 'gestation',  
27  
28 'pregnant', 'fertility', 'pregnancy disease evolution', 'disease transfer to baby', 'breastfeeding',  
29  
30 'breast feeding', 'conception', 'conceived' and 'placental transfer'), and then combining  
31  
32 keywords together with the categories of interest to ensure coverage of all topics of interest.  
33  
34

35  
36  
37 SELA methodology involved identification of keywords (including generic keywords/keyword  
38  
39 phrases and specific keywords/keyword phrases), assessment of keyword search volume  
40  
41 and ranking of individual sites in search engine results. The 'click through rate' was  
42  
43 combined with the 'monthly search volume' to estimate the 'share of attention index'. The  
44  
45 final keyword pool included the categories 'colitis ulcerosa', 'ulcerative colitis', 'Crohn's  
46  
47 disease', 'lupus', 'rheumatoid arthritis', 'regional enteritis' and 'systemic lupus  
48  
49 erythematosus', and the following FPP-related keywords 'gestation', 'birth control',  
50  
51 'pregnancy', 'fertility', 'miscarriage' and 'family planning'.  
52  
53  
54  
55  
56  
57  
58  
59  
60

## Results

### *Physician Survey*

Many rheumatologists and gastroenterologists spontaneously reported having discussed FPP-related topics with their female patients of child-bearing age; reports were consistent across all countries studied (Figure 1A). Interestingly, the number of US gastroenterologists who discussed these topics with their female patients increased significantly between the first and second Phases of the survey (Figure 1A). This was particularly true for fertility, pregnancy and/or family planning issues specifically, in which the percentage of US gastroenterologists discussing these topics increased from 67% to 79% between the two Phases (significant difference, 95% confidence level; N=100 for both survey phases); however there was no difference in European practice, with levels remaining at 60%.

When prompted, the majority of rheumatologists (74-92%) and gastroenterologists (74%) reported having discussed conception/pregnancy with female patients of child-bearing age. However, less than half of these physicians discussed FPP related issues with their patient's treating GP (i.e. primary care physician) or gynaecologist (Figure 1B and Figure 1C; survey Phase 2 data shown; see Questions 20 and 21 Physician Survey Appendix 1).

When seeking additional information regarding FPP, community rheumatologists and gastroenterologists reported currently relying on presentations and educational events at congresses, other healthcare professionals and key opinion leaders as their preferred sources of information.

### *Patient Survey and Netnography Analysis*

Patients reported that the frequency of FPP-related conversations during their medical appointments was lower than their discussions about emotional well-being and employment (Figure 2A), although most female patients of child-bearing age (up to 85%) reported discussing these issues at some point during their care pathway (Figure 2B).

Patients currently on medication for the treatment of their condition reported being more concerned about FPP issues than those not receiving medication, with 63% of those on medication reporting that pregnancy was a concern compared to only 32% of patients not receiving medication. In addition, the female age group with most concerns related to FPP was between the ages of 30 and 34, with >60% of these patients reporting concerns (Figure 2C; survey Phase 2 data shown, similar trend observed in Phase 1). Concern was high between the ages of 25 and 39 (57-63%) but decreased to 44% in patients aged between 40 and 45.

Patients were asked when they would prefer to discuss the topics of FPP. The survey revealed that approximately 35% of patients prefer to discuss these issues in the context of their disease and treatment whenever a decision is made that could have an impact on their family planning or ability to become pregnant (Figure 3A). Approximately a quarter feel that one conversation with their healthcare professional on this topic is enough, although approximately 17% would like to discuss these topics at every visit. Furthermore, approximately a third of patients prefer to initiate conversations on this topic themselves (30-40% patients) or to obtain information from their healthcare professional when appropriate to their individual situation (15-35% patients).

1  
2  
3 Patients gave a range of reasons for not discussing FPP concerns with their healthcare  
4 provider, with the most common reason being that they forgot to mention it (Figure 3B).  
5  
6 Other important reasons identified as barriers for discussing FPP was the impression that the  
7 healthcare professional either did not have time for discussions or that they were not the  
8 correct physician to provide advice on these topics. Importantly, some patients also reported  
9 that they choose to not discuss FPP issues as they were reluctant to change medication.  
10  
11 Very few patients felt that their healthcare professional was reluctant to discuss these  
12 topics. Over a quarter of respondents indicated that they had 'other' reasons for not  
13 discussing these issues with their doctor (Figure 3B). A higher proportion (39%) of patients  
14 aged 40-45 years recorded 'other' reasons for not discussing FPP issues with their doctor,  
15 compared to younger patients ('other' was recorded by 21.7% of 20-24 year olds, 18.3% of  
16 25-29 year olds, 18.7% of 30-34 year olds and 25.6% 35-39 year olds).  
17  
18  
19  
20  
21  
22  
23  
24  
25  
26  
27  
28  
29  
30

31 Patients report a preference for seeking information regarding FPP from their gynaecologist  
32 (Figure 4A), whereas disease specialists (e.g. rheumatologist or gastroenterologist) are their  
33 key contact point for management of their chronic condition (Figure 4B). GPs/primary care  
34 physicians were also identified by patients as central to their discussions of both FPP and  
35 their chronic condition (Figure 4A-B). It should be noted, however, that patient reports of a  
36 preference for one specialist over another regarding FPP discussions could be expected to  
37 vary by country given differences in treatment practices. For example, in the USA patients  
38 may commonly visit a gynaecologist/obstetrician for all pregnancy care whereas in the UK  
39 the patient's GP and local midwife may oversee most of their pregnancy planning and  
40 management. In addition, when responding to the survey some, but not all, patients may  
41 have regarded the terms 'obstetrician' and 'gynaecologist' as interchangeable based on their  
42 own experience.  
43  
44  
45  
46  
47  
48  
49  
50  
51  
52  
53  
54  
55  
56  
57  
58  
59  
60

1  
2  
3 Other than their doctors' office/clinic/surgery, patients reported researching and discussing  
4 information regarding FPP through multiple channels (Figure 4C): predominantly on disease-  
5 related websites and with family and friends. In addition, patients reported that specific  
6 condition-related forums/patient organisations did not play a prominent part in their search  
7 for online information on these topics. A number of key themes, such as discussions around  
8 disease state, adverse effects, treatment, switch behaviour and wash-out requirements,  
9 emerged after following online patient activity. Other themes noted were patient emotions  
10 and feelings, interactions with healthcare professionals, how best to identify the correct  
11 healthcare professional for their treatment, concerns about inconsistent advice, infertility,  
12 sexuality and conception, disease carry-over to the baby, placental transfer of treatments  
13 and breastfeeding.  
14  
15  
16  
17  
18  
19  
20  
21  
22  
23  
24  
25  
26  
27

28  
29 Importantly, approximately 30-55% of female patients reported that their concerns relating  
30 to FPP are not adequately addressed or settled during their medical appointments (data  
31 from patient survey Phase 2). Some variability in this response was observed across  
32 countries, with 30% of patients from the USA, 34% from Italy, 35% from Spain, 39% from  
33 the UK, 43% from France and 54% from Germany reporting their concerns were not settled  
34 (data from patient survey Phase 2). Patients also reported that consistency of advice and  
35 information given by multiple healthcare professionals, including nurses, was low with only  
36 about 30-40% of patients reporting consistent advice. Again, responses to this question  
37 varied across countries with 33% of patients reporting consistent advice from Spain and the  
38 UK, 36% from Germany and Italy, 40% from the USA and 41% from France (data from  
39 patient survey Phase 2). Inconsistent advice was reported by about 30-50% of patients  
40 overall: 27% from Italy, 32% from Spain, 38% from France, 41% from the USA, 44% from  
41 Germany and 49% from the UK (remaining patients selected a neutral response to this  
42 question; data from patient survey Phase 2).  
43  
44  
45  
46  
47  
48  
49  
50  
51  
52  
53  
54  
55  
56  
57  
58  
59  
60

## Discussion

The investigation described here was carried out to illuminate some of the issues surrounding FPP for female patients of child-bearing age who live with chronic inflammatory diseases. Recently it was reported that almost half of female IBD patients feel their disease and/or treatment influences their decisions about FPP but despite this about two thirds had not discussed these issues with their doctor.<sup>25</sup> The results from the current study confirmed that FPP are considered important issues by this group of female patients and that there are key gaps in communication which result in inconsistent advice and subsequent patient concern/confusion. Importantly, the majority of female patients of child-bearing age reported that current clinical practice does not adequately address their concerns related to FPP in inflammatory disease.

Some clinical recommendations for the management of inflammatory disease during pregnancy have been published<sup>14-16 21 26</sup> and advise that clinical remission/stable low disease activity be achieved prior to conception and maintained throughout pregnancy using appropriate therapy as needed. However, in the current study few patients reported discussing FPP at the point their condition was stable enough to become pregnant, suggesting a gap in necessary communication from physicians to patients regarding the need to control disease activity prior to conception, the impact of disease activity on pregnancy outcomes and the need to adjust medications during pregnancy. Indeed, a general lack of patient knowledge regarding continued use of medication during pregnancy was highlighted recently by a survey of female IBD patients which revealed a widespread, but inaccurate, belief that all medications needed to be stopped during pregnancy.<sup>25</sup> Respondents to the current patient survey also reported that inconsistencies in advice regarding the use of anti-inflammatory and immunosuppressive medications during



1  
2  
3 pregnancy are common. Together, these results suggest a need for continuing education of  
4 all specialists involved in the care of women with inflammatory disease in order to ensure  
5 women understand the implications of their condition and treatment on FPP. Timely  
6 discussion of FPP issues is also an important consideration given a high percentage of  
7 pregnancies are unplanned.<sup>27</sup> Congress presentations and associated education events were  
8 identified by physicians, specifically rheumatologists and gastroenterologists, as their  
9 currently preferred source of information and continuing education – which may also be  
10 applicable to other specialists. As such, these events should be actively targeted to maximise  
11 and improve continued education.  
12  
13  
14  
15  
16  
17  
18  
19  
20  
21  
22  
23

24 GPs/primary care physicians and gynaecologists were identified by patients as frequently  
25 central to their discussions on FPP issues, although research has previously shown that 41%  
26 of GPs do not initiate discussion of FPP with female patients affected by IBD.<sup>25</sup> Importantly a  
27 gap in communication was identified between these physicians and the specialists who treat  
28 chronic inflammatory diseases. As such, improved cross-specialty communication should be  
29 strongly encouraged, particularly for discussions regarding planning and treatment  
30 guidelines. A recent survey of GPs in Ireland did show that the majority of GPs report  
31 seeking additional advice on FPP issues, in relation to their female IBD patients, from  
32 tertiary specialists<sup>25</sup> so improved education for all specialties and fostering communication  
33 should assist dissemination of information and consistent advice for patients. Furthermore,  
34 all of those involved in the care of female patients of child-bearing age who live with chronic  
35 inflammatory disease, not only the immunological disease specialists, should be exposed to  
36 continued education on this topic.  
37  
38  
39  
40  
41  
42  
43  
44  
45  
46  
47  
48  
49  
50  
51  
52  
53

54 In order to improve the dissemination of information regarding FPP to patients, it is  
55 important to identify when patients prefer to receive such information and also why this  
56  
57  
58  
59  
60

1  
2  
3 information may not be adequately communicated. Patient preference regarding timing of  
4  
5 discussions about FPP varied. This variability may be due to the personal nature of this  
6  
7 topic, differences in retention of information and differences in healthcare services/societal  
8  
9 norms across different countries. Patients did, however, generally report that they wished to  
10  
11 discuss FPP-related issues with their specialist physician (i.e. rheumatologist or  
12  
13 gastroenterologist) every time a decision was made that could impact upon their FPP. As  
14  
15 such, healthcare professionals should routinely consider any issues that affect fertility or  
16  
17 pregnancy and offer to have a conversation with their patient regarding these issues at  
18  
19 every clinic visit, unless it is known not to be relevant. It may also be useful to clarify patient  
20  
21 expectations for support and advice during these discussions. Patients on medication were  
22  
23 more concerned about FPP issues than those not receiving medication, as were female  
24  
25 patients between the ages of approximately 25 and 40. The high level of concern in both of  
26  
27 these groups highlights these patients as key populations requiring additional consideration,  
28  
29 although it could be argued that all women of child-bearing age should be targeted for such  
30  
31 communications.  
32  
33  
34  
35  
36

37 The most common reason patients offered to explain why they did not raise FPP with their  
38  
39 healthcare provider was that they forgot to mention it during their consultation. Many also  
40  
41 stated they avoided such discussion as they did not want to change their medication,  
42  
43 implying that a fear of destabilising their disease could influence the preparedness of  
44  
45 patients to discuss FPP topics. Other key reasons identified were the impression that their  
46  
47 physician did not have time for the discussion or that they felt their treating physician was  
48  
49 not the correct physician to consult on these topics. Consequently, physicians should  
50  
51 consider periodically raising the issue themselves, particularly when treatment decisions or  
52  
53 disease activity could impact FPP plans. Notably over a quarter of respondents indicated that  
54  
55 they had 'other' reasons for not discussing these issues with their doctor. It is possible that  
56  
57  
58  
59  
60

1  
2  
3 this high response was due to patient demographics (e.g. age, social background or current  
4 use of contraception) and patients considering their family already complete. Indeed, a  
5 higher proportion of older patients recorded 'other' reasons for not discussing FPP issues  
6 with their doctor compared to younger patients. Patient emotions was an important theme  
7 identified for online discussions, perhaps particularly relevant for those with a history of  
8 miscarriage/stillbirth or infertility problems, and it should also be considered that such  
9 associations could be a factor underlying why some patients reported that they did not  
10 discuss FPP with their physician for 'other' reasons.  
11  
12  
13  
14  
15  
16  
17  
18  
19  
20  
21

22 Of key importance, many female patients of child-bearing age reported that they did not feel  
23 that their concerns relating to FPP in the context of their disease were adequately addressed  
24 during their medical appointments. There was some variability in patient response across  
25 countries to this question, suggesting that cultural differences and differences in healthcare  
26 system structure may contribute to the variability in patient satisfaction. However, it is clear  
27 that there can be a definite improvement in the response to these issues and all healthcare  
28 professionals should consider how they could increase such communication and support to  
29 their patients. This could include provision of better patient educational material and advice  
30 on reliable and up-to-date websites containing FPP-related information. Indeed, patients  
31 reported that they frequently sought information online, although specific condition-related  
32 forums/patient organisations did not appear to be common sources of this information.  
33 Furthermore, the online landscape was fragmented by disease area, with no specific  
34 resource (beyond "Motherisk"; [www.motherisk.org](http://www.motherisk.org)) that provides FPP guidance on common  
35 autoimmune conditions and medication use affecting women in the reproductive age group.  
36 As such, development of a single site with consistent up-to-date guidance covering topics  
37 identified by patients as key interests would probably be of great value. Alternatively patient  
38 and/or physician organisations could incorporate more detailed information and advice on  
39  
40  
41  
42  
43  
44  
45  
46  
47  
48  
49  
50  
51  
52  
53  
54  
55  
56  
57  
58  
59  
60

1  
2  
3 their websites to offer improved support to concerned patients and the various physicians  
4 involved in their care during pregnancy. Another key improvement would be increased  
5 dialogue, by telephone, letters or e-mail, between the varied physicians involved in an  
6 individual patient's care in order to provide coordinated advice and support. Together these  
7 measures would aim to improve patient support and satisfaction.  
8  
9  
10  
11  
12

13  
14  
15 It should be noted that this study does have some limitations. Two important limitations of  
16 the patient survey were an absence of formal survey validation and the reliance upon self-  
17 reporting of diagnosis by patients. Furthermore, even though the surveys were translated  
18 into local languages, differences in terminology and healthcare system structure exist across  
19 countries which could impact pooling of results; for example, the terms obstetrician and  
20 gynaecologist could be understood as being interchangeable in some countries but distinctly  
21 different specialties in others meaning patient interpretation of the survey could vary. The  
22 physician survey may also suffer related issues. In addition, the physician survey was only  
23 delivered to gastroenterologists in the USA and did not investigate the activities of these  
24 physicians in other countries. Furthermore, the netnography research may have been limited  
25 by use of keywords common to one country/region but different in others (e.g. 'fertility' vs  
26 'infertility') which could have restricted comprehensive analysis of the online landscape and  
27 patient discussions. Finally, this study did not investigate the related concerns of men  
28 suffering from inflammatory disease who may be using chronic medication and also  
29 considering a family; indeed this population is often understudied and may need improved  
30 support.  
31  
32  
33  
34  
35  
36  
37  
38  
39  
40  
41  
42  
43  
44  
45  
46  
47  
48  
49

50  
51  
52 In summary, FPP are extremely important issues for female patients of child-bearing age  
53 who live with chronic inflammatory disease. A summary of key considerations, highlighted  
54 by the results from the current study, for all physicians involved in the treatment of this  
55  
56  
57  
58  
59  
60

1  
2  
3 often neglected group of patients is presented in Figure 5. It is clear that female patients of  
4  
5 child-bearing age do wish to discuss these issues with their physicians although expectations  
6  
7 regarding frequency of discussion and their preferred physician for advice vary considerably.  
8  
9 Currently it appears that more can be done to provide these patients with consistent and co-  
10  
11 ordinated information regarding their disease and how it, and associated treatments, could  
12  
13 affect conception or pregnancy. Results from this study suggest physicians should regularly  
14  
15 initiate discussion of these topics with their female patients of child-bearing age, particularly  
16  
17 those on chronic medication or when changes to the treatment plan could impact pregnancy  
18  
19 outcome, in order to improve patient support. In addition, greater cross-speciality  
20  
21 communication between physicians involved in different aspects of the patient's care, from  
22  
23 gastroenterologists and rheumatologists to gynaecologists/obstetricians and GPs, is needed  
24  
25 to improve the consistency of advice offered to this often overlooked patient population.  
26  
27  
28  
29

### 30 **Acknowledgements**

31  
32 This publication has been funded by UCB Pharma. The authors acknowledge InSites  
33  
34 Consulting and ACROSS HEALTH for survey development, management and analysis. The  
35  
36 authors also acknowledge Costello Medical Consulting for editorial and administrative  
37  
38 support.  
39  
40  
41  
42  
43  
44  
45  
46  
47  
48  
49  
50  
51  
52  
53  
54  
55  
56  
57  
58  
59  
60

## References

1. Symmons D, Turner G, Webb R, Asten P, Barrett E, Lunt M, et al. The prevalence of rheumatoid arthritis in the United Kingdom: new estimates for a new century. *Rheumatology* 2002;41(7):793-800.
2. Symmons DP. Epidemiology of rheumatoid arthritis: determinants of onset, persistence and outcome. *Best practice & research. Clinical rheumatology* 2002;16(5):707-22.
3. Carbone LD, Cooper C, Michet CJ, Atkinson EJ, O'Fallon WM, Melton LJ, 3rd. Ankylosing spondylitis in Rochester, Minnesota, 1935-1989. Is the epidemiology changing? *Arthritis and rheumatism* 1992;35(12):1476-82.
4. J. SJaB. *Ankylosing Spondylitis in Clinical Practice*. Springer-Verlag London Limited, 2011.
5. Binder V. Epidemiology of IBD during the twentieth century: an integrated view. *Best practice & research. Clinical gastroenterology* 2004;18(3):463-79.
6. Gollop JH, Phillips SF, Melton LJ, 3rd, Zinsmeister AR. Epidemiologic aspects of Crohn's disease: a population based study in Olmsted County, Minnesota, 1943-1982. *Gut* 1988;29(1):49-56.
7. Loftus EV, Jr. Clinical epidemiology of inflammatory bowel disease: Incidence, prevalence, and environmental influences. *Gastroenterology* 2004;126(6):1504-17.
8. Klippel JH. Systemic lupus erythematosus: demographics, prognosis, and outcome. *The Journal of rheumatology. Supplement* 1997;48:67-71.
9. Baird DD, Narendranathan M, Sandler RS. Increased risk of preterm birth for women with inflammatory bowel disease. *Gastroenterology* 1990;99(4):987-94.
10. van Dunne FM, Lard LR, Rook D, Helmerhorst FM, Huizinga TW. Miscarriage but not fecundity is associated with progression of joint destruction in rheumatoid arthritis. *Annals of the rheumatic diseases* 2004;63(8):956-60.
11. Morales M, Berney T, Jenny A, Morel P, Extermann P. Crohn's disease as a risk factor for the outcome of pregnancy. *Hepato-gastroenterology* 2000;47(36):1595-8.

- 1  
2  
3 12. Ostensen M. Sex hormones and pregnancy in rheumatoid arthritis and systemic lupus  
4 erythematosus. *Annals of the New York Academy of Sciences* 1999;876:131-43;  
5 discussion 44.  
6  
7  
8  
9  
10 13. Bush MC, Patel S, Lapinski RH, Stone JL. Perinatal outcomes in inflammatory bowel  
11 disease. *The journal of maternal-fetal & neonatal medicine : the official journal of the*  
12 *European Association of Perinatal Medicine, the Federation of Asia and Oceania*  
13 *Perinatal Societies, the International Society of Perinatal Obstet* 2004;15(4):237-41.  
14  
15  
16  
17  
18 14. Mahadevan U, Cucchiara S, Hyams JS, Steinwurz F, Nuti F, Travis SP, et al. The London  
19 Position Statement of the World Congress of Gastroenterology on Biological Therapy  
20 for IBD with the European Crohn's and Colitis Organisation: pregnancy and  
21 pediatrics. *The American journal of gastroenterology* 2011;106(2):214-23; quiz 24.  
22  
23  
24  
25  
26  
27 15. Ng SW, Mahadevan U. Management of inflammatory bowel disease in pregnancy. *Expert*  
28 *review of clinical immunology* 2013;9(2):161-74.  
29  
30  
31 16. Ostensen M, Forger F. Management of RA medications in pregnant patients. *Nature*  
32 *reviews. Rheumatology* 2009;5(7):382-90.  
33  
34  
35 17. Syme MR, Paxton JW, Keelan JA. Drug transfer and metabolism by the human placenta.  
36 *Clinical pharmacokinetics* 2004;43(8):487-514.  
37  
38  
39 18. Buckley LM, Bullaboy CA, Leichtman L, Marquez M. Multiple congenital anomalies  
40 associated with weekly low-dose methotrexate treatment of the mother. *Arthritis and*  
41 *rheumatism* 1997;40(5):971-3.  
42  
43  
44  
45  
46 19. Lloyd ME, Carr M, McElhatton P, Hall GM, Hughes RA. The effects of methotrexate on  
47 pregnancy, fertility and lactation. *QJM : monthly journal of the Association of*  
48 *Physicians* 1999;92(10):551-63.  
49  
50  
51  
52 20. Brent RL. Teratogen update: reproductive risks of leflunomide (Arava); a pyrimidine  
53 synthesis inhibitor: counseling women taking leflunomide before or during pregnancy  
54  
55  
56  
57  
58  
59  
60

- 1  
2  
3 and men taking leflunomide who are contemplating fathering a child. *Teratology*  
4  
5 2001;63(2):106-12.  
6  
7 21. Chakravarty EF, Sanchez-Yamamoto D, Bush TM. The use of disease modifying  
8  
9 antirheumatic drugs in women with rheumatoid arthritis of childbearing age: a  
10  
11 survey of practice patterns and pregnancy outcomes. *The Journal of rheumatology*  
12  
13 2003;30(2):241-6.  
14  
15 22. Langen ES, Chakravarty EF, Liaquat M, El-Sayed YY, Druzin ML. High Rate of Preterm  
16  
17 Birth in Pregnancies Complicated by Rheumatoid Arthritis. *American journal of*  
18  
19 *perinatology* 2013.  
20  
21 23. Hameen-Anttila K, Jyrkka J, Enlund H, Nordeng H, Lupattelli A, Kokki E. Medicines  
22  
23 information needs during pregnancy: a multinational comparison. *BMJ open*  
24  
25 2013;3(4).  
26  
27 24. Peters SL, Lind JN, Humphrey JR, Friedman JM, Honein MA, Tassinari MS, et al. Safe  
28  
29 lists for medications in pregnancy: inadequate evidence base and inconsistent  
30  
31 guidance from Web-based information, 2011. *Pharmacoepidemiology and drug*  
32  
33 *safety* 2013;22(3):324-8.  
34  
35 25. Toomey D, Waldron B. Family planning and inflammatory bowel disease: the patient and  
36  
37 the practitioner. *Family practice* 2013;30(1):64-8.  
38  
39 26. van der Woude CJ, Kolacek S, Dotan I, Oresland T, Vermeire S, Munkholm P, et al.  
40  
41 European evidenced-based consensus on reproduction in inflammatory bowel  
42  
43 disease. *Journal of Crohn's & colitis* 2010;4(5):493-510.  
44  
45 27. Finer LB, Henshaw SK. Disparities in rates of unintended pregnancy in the United States,  
46  
47 1994 and 2001. *Perspectives on sexual and reproductive health* 2006;38(2):90-6.  
48  
49  
50  
51  
52  
53  
54  
55  
56  
57  
58  
59  
60



1  
2  
3 **Figure 1.** Frequency of physician-initiated discussions regarding FPP issues with female  
4 patients and their GPs or gynaecologists (survey Phase 2 data shown in B and C)

5  
6  
7 *Abbreviations:* Ga = gastroenterologist; Rh = rheumatologist. \* $p < 0.05$  compared to Phase 1  
8  
9 (two-sided z-test with significance level 0.05)  
10

11  
12  
13 **Figure 2.** Patient reported (patient survey) topics of discussion with specialist physicians,  
14 the frequency of patient-initiated FPP discussion and the importance of FPP issues stratified  
15 by patient age (data from survey Phase 2 shown in C)  
16  
17

18  
19  
20  
21  
22 **Figure 3.** Patient preference for frequency of discussions relating to FPP issues and  
23 identification of issues that prevented discussion (data from patient survey Phase 2 shown)  
24  
25

26  
27  
28 **Figure 4.** Patient preference for choice of healthcare provider for discussions of their  
29 condition and FPP issues, and their preferred source of additional information (outside  
30 doctors' office/clinic/surgery) relating to both their condition and FPP issues (data from  
31 patient survey Phase 2 shown)  
32  
33  
34  
35

36  
37  
38 **Figure 5.** FPP-related considerations for practicing physicians treating female patients of  
39 child-bearing age who live with chronic inflammatory disease: key messages from the survey  
40 of current clinical practice and patient perceptions.  
41  
42  
43  
44  
45  
46  
47  
48  
49  
50  
51  
52  
53  
54  
55  
56  
57  
58  
59  
60

**A) Proportion of physicians who report having discussed family planning topics with female patients of child-bearing age (last 3 patients were considered)**

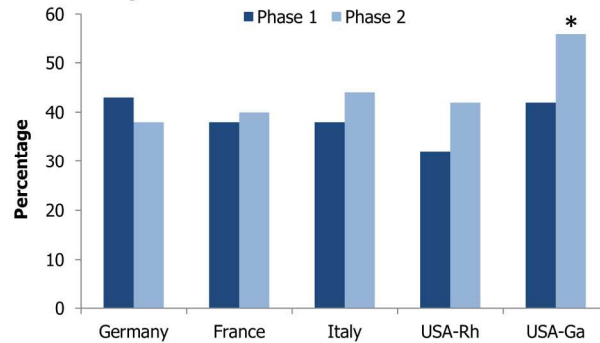

**B) Proportion of physicians who report having discussed family planning topics with a pregnant patient's GP**

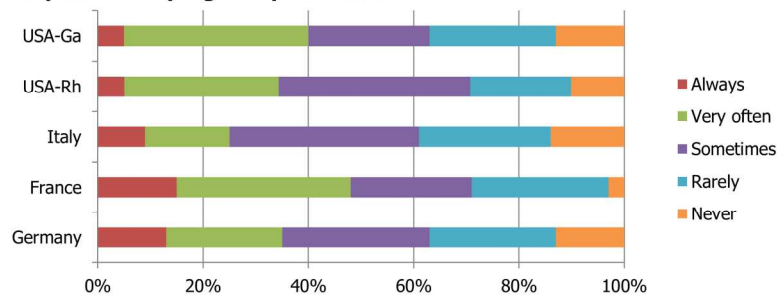

**C) Proportion of physicians who report having discussed family planning topics with a pregnant patient's gynaecologist**

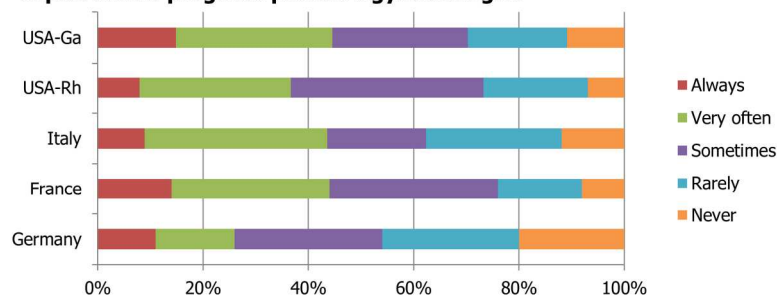

Figure 1. Frequency of physician-initiated discussions regarding FPP issues with female patients and their GPs or gynaecologists (survey Phase 2 data shown in B and C). Abbreviations: Ga = gastroenterologist; Rh = rheumatologist. \* $p < 0.05$  compared to Phase 1 (two-sided z-test with significance level 0.05).  
180x253mm (300 x 300 DPI)

**A) Topics discussed during any of the last three medical appointments**

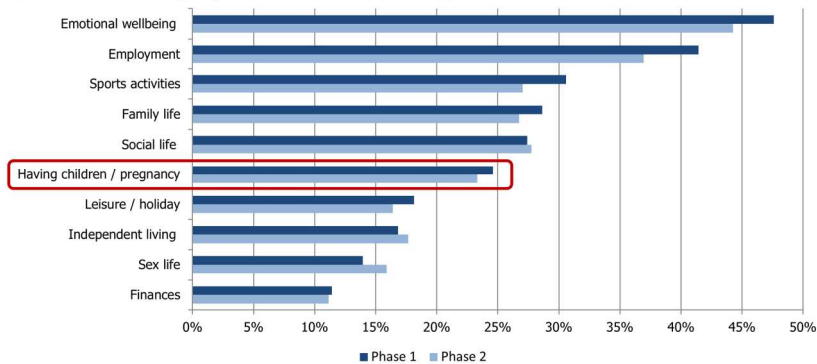

**B) Have family planning concerns ever been discussed?**

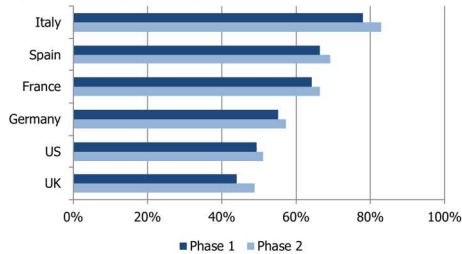

**C) Are family planning issues of concern?**

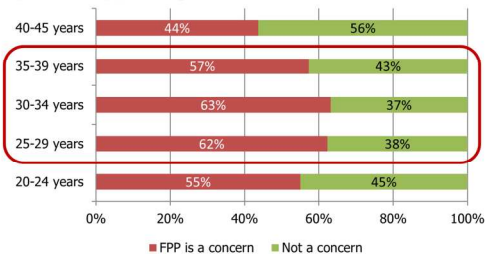

Figure 2. Patient reported (patient survey) topics of discussion with specialist physicians, the frequency of patient-initiated FPP discussion and the importance of FPP issues stratified by patient age (data from survey Phase 2 shown in C).  
180x128mm (300 x 300 DPI)

1  
2  
3  
4  
5  
6  
7  
8  
9  
10  
11  
12  
13  
14  
15  
16  
17  
18  
19  
20  
21  
22  
23  
24  
25  
26  
27  
28  
29  
30  
31  
32  
33  
34  
35  
36  
37  
38  
39  
40  
41  
42  
43  
44  
45  
46  
47  
48  
49  
50  
51  
52  
53  
54  
55  
56  
57  
58  
59  
60

**A) How often would you like the topic of family planning to be brought up during your medical appointments?**

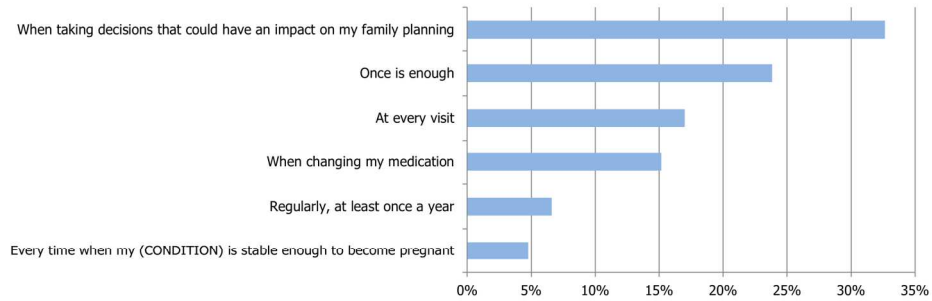

**B) Issues that prevented a discussion**

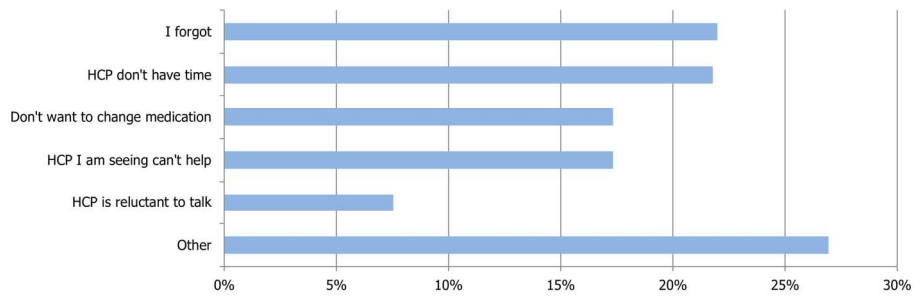

Figure 3. Patient preference for frequency of discussions relating to FPP issues and identification of issues that prevented discussion (data from patient survey Phase 2 shown).  
180x126mm (300 x 300 DPI)

View only

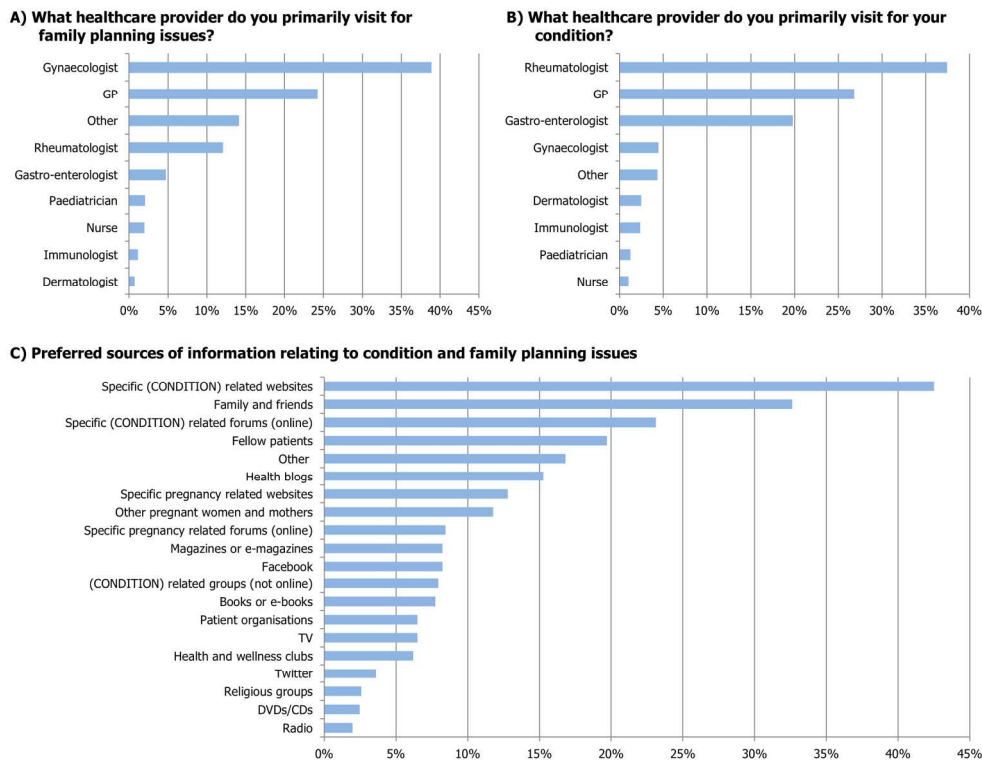

Figure 4. Patient preference for choice of healthcare provider for discussions of their condition and FPP issues, and their preferred source of additional information (outside doctors' office/clinic/surgery) relating to both their condition and FPP issues (data from patient survey Phase 2 shown).  
180x138mm (300 x 300 DPI)

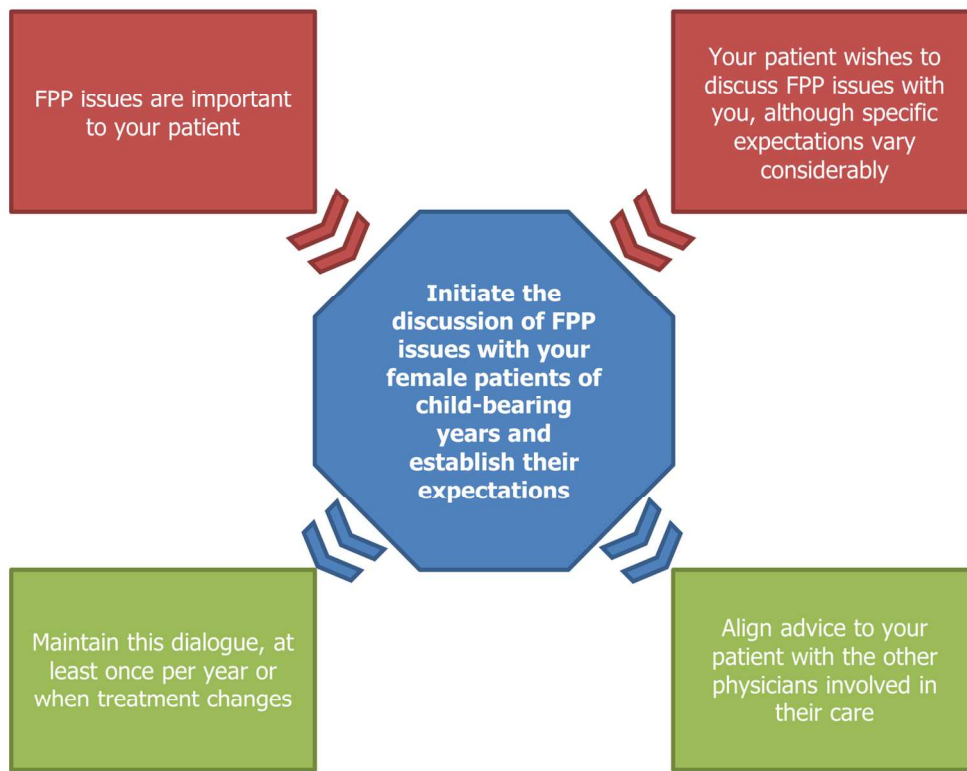

Figure 5. FPP-related considerations for practicing physicians treating female patients of child-bearing age who live with chronic inflammatory disease: key messages from the survey of current clinical practice and patient perceptions.  
145x117mm (300 x 300 DPI)

## Appendix 1

### Physician Survey Questionnaire

Overview – survey flow

1. Participant profiling and screening
2. Implicit measurement of impact FPP
3. Communication testing
4. Explicit measurement of FPP related conversations

Thank you for your interest in our study. Before we begin, we would like to assure you that we act in accordance with the ESOMAR, EphMRA, ABPI, MRS and BHBIA codes of conduct regarding anonymity and confidentiality.

Any information you disclose will be treated in the strictest confidence and the results are pooled so none of the answers are attributable to individual respondents.

First we would like to ask you a few qualifying questions. This will take less than 1 minute. The questionnaire takes some 20 minutes to complete and covers the domain of Rheumatoid Arthritis/Crohn's Disease.

The market research is being conducted on behalf of a pharmaceutical company. The market research study itself is strictly non-promotional. The company commissioning this research has no access whatsoever to information regarding respondents.

If you have any problems or questions filling out this questionnaire, please feel free to contact us at [support@leadphysician.com](mailto:support@leadphysician.com).

- I hereby agree to proceed with the questionnaire on this basis. **STOP if not selected**

The participant should agree to treat with the utmost confidentiality all data and information to which he is made privy in light of and/or as a result of his participation in this study.

The participant expressly guarantees that he will not divulge said information or data, nor will third parties be granted access. He will not publish or reproduce the information, nor will he exploit it in any other way.

Only public information or information that the participant may also obtain via other legitimate means than through participation in this study are not subject to this obligation of confidentiality.

This obligation is irrevocable and remains in effect as long as the information is to be considered confidential and has, therefore, not been made public by the authorized party or parties.

- Yes, I expressly and unconditionally accept the above obligation of confidentiality.  
**STOP if not selected**

ADVERSE EVENT REPORTING: We have been asked to provide our client with details of adverse events divulged during the course of this market research. Although this is an online survey and the information you provide will of course be treated in confidence, we are still under an obligation to report any information on adverse events in specific patients, even if you have already reported said event to the company or the regulatory authorities. In this case you will be contacted with a request to waive the confidentiality provided under the market research codes of conduct specifically for this particular adverse event. All other information you provide during the course of the survey will remain confidential.

- I hereby confirm to have been informed that the organiser of the survey is under the obligation to collect and report all information on adverse events linked to the client's product as recorded by me during the course of this research. **STOP if not selected**

*[Parameters to be recorded from panel database:*

- Age
- Gender
- Region
- No Clinical investigation or pharma/biotech manufacturer (not in US)]

## **PARTICIPANT PROFILING AND SCREENING**

### **1. What is your primary specialty?**

Question type: Single response

- |                                                                                           |                     |
|-------------------------------------------------------------------------------------------|---------------------|
| <input type="checkbox"/> Gastroenterology (US only)                                       | =GASTROENTEROLOGIST |
| <input type="checkbox"/> Rheumatology                                                     | = RHEUMATOLOGIST    |
| <input type="checkbox"/> Internal medicine specialized in rheumatology (Germany only)     | = RHEUMATOLOGIST    |
| <input type="checkbox"/> Internal medicine not specialized in rheumatology (Germany only) | <b>STOP</b>         |
| <input type="checkbox"/> Other specialty                                                  | <b>STOP</b>         |

*[Gastroenterologists get questions personalized to Crohn's Disease, Rheumatologists to Rheumatoid Arthritis.]*

### **2. How long have you been IN PRACTICE since qualifying as a specialist?**

*[Question type: Open comment - numeric*

*Max score allowed: 50 ("Years" - next to box)]*

**[If < 3 or > 30 => STOP]**

### **3. What percent of your working time is dedicated to treating patients?**



1  
2  
3 [Question type: Open comment - numeric

4  
5 0 to 100%]

6  
7  
8  
9  % is dedicated to treating patients [STOP if less than 50%]

10  
11  
12  
13  
14  
15 **4. In an average month, approximately how many different patients do you see for all disorders**  
16 **and conditions and for whom you are personally involved in making treatment decisions? Please**  
17 **count each patient once, not the number of visits.**

18  
19 [Question type: Open comment - numeric

20  
21 Max score allowed: 1000]

22  
23 [STOP if <20]

24  
25

26  
27  
28  
29  
30  
31 **5. In an average month, approximately how many different patients do you see for Rheumatoid**  
32 **Arthritis (for Rheumatologists)/ Crohn's Disease (for Gastroenterologists) and for whom you are**  
33 **personally involved in making treatment decisions? Please count each patient once, not the**  
34 **number of visits.**

35  
36 [Question type: Open comment - numeric

37  
38 Max score allowed: number at S4

39  
40 Number needs to be lower or equal than in previous question.]

41  
42 [STOP if < 20 RA patients or < 8 CD patients ]

43  
44

1  
2  
3 **6. In an average month, approximately how many different patients with Rheumatoid Arthritis**  
4 **(for Rheumatologists)/ Crohn's Disease (for Gastroenterologists) do you see that are on biologic**  
5 **treatment?**  
6

7 *[Question type: Open comment - numeric]*

8  
9 *Max score allowed: Number in S5*

10  
11 *Number needs to be lower or equal than in previous question]*

12  
13 *[STOP if < 10 RA patients or < 2 CD patients]*

14  
15  
16

17  
18  
19 **7. What type of practice do you have? (tick only one)**

20  
21 *[Question type: Single response]*

- 22  
23  Office only *[STOP in France]*  
24  Hospital only  
25  Office and hospital *[(don't show in Germany)]*  
26  
27

28  
29 **8. What is the size of hospital where you carry out your regular practice?**

30  
31 *[Question type: Single response]*

32  
33 *[Show only if 'hospital' or 'office and hospital' was selected in q0]*

- 34  More than 700 beds  
35  400 to 700 beds  
36  Less than 400 beds  
37

38  
39 **9. Have you taken part in a market research study in the area of Rheumatoid Arthritis (for**  
40 **Rheumatologists)/ Crohn's Disease (for Gastroenterologists) in the last month?**

41 *[Question type: Single response]*

- 42  
43  Yes **[STOP]**  
44  No  
45

46  
47 **10. What percentage of your Rheumatoid Arthritis/Crohn's Disease patient base can be attributed**  
48 **to the following categories?**

49  
50 *[Question type: Open comment - numeric]*

51  
52 *Should add up to 100%*

53

|                                  |   |
|----------------------------------|---|
| Male younger than 45 years old   | % |
| Male 45 years or older           | % |
| Female younger than 45 years old | % |
| Female 45 years or older         | % |

54  
55  
56  
57  
58  
59  
60

**IMPLICIT MEASUREMENT OF IMPACT FPP**

In the following questions we would like to talk about the topics you discussed with your moderate to severe Rheumatoid Arthritis/Crohn's Disease patients.

Obviously, most of the conversations are about clinical topics, but from now on we would like you to think about **non clinical nor treatment related topics**.

**11. Please think back about your last 6 [3: IF Q10\_1 OR Q10\_2=0] male patients with moderate to severe Rheumatoid Arthritis/Crohn's Disease that were initiated on treatment by you. Which topics did you discuss with these patients?**

Please bear in mind to mention non clinical and non-treatment related topics.

[Question type: Open comment – text]

|                | Last 3 patients younger than 45 years old [only show if Q10 "Male younger than 45 years old" > 0] | Last 3 patients of 45 years or older [only show if Q10 "Male 45 years or older" > 0] |
|----------------|---------------------------------------------------------------------------------------------------|--------------------------------------------------------------------------------------|
| Male patient 1 |                                                                                                   |                                                                                      |
| Male patient 2 |                                                                                                   |                                                                                      |
| Male patient 3 |                                                                                                   |                                                                                      |

**12. Please think back about your last 6 [3: IF Q10\_3 OR Q10\_4=0] female patients with moderate to severe Rheumatoid Arthritis/Crohn's Disease that were initiated on treatment by you. Which topics did you discuss with these patients?**

Please bear in mind to mention non clinical and non-treatment related topics.

[Question type: Open comment – text]

|                  | Last 3 patients younger than 45 years old [only show if Q10 "Female younger than 45 years old" > 0] | Last 3 patients of 45 years or older [only show if Q10 "Female 45 years or older" > 0] |
|------------------|-----------------------------------------------------------------------------------------------------|----------------------------------------------------------------------------------------|
| Female patient 1 |                                                                                                     |                                                                                        |
| Female patient 2 |                                                                                                     |                                                                                        |
| Female patient 3 |                                                                                                     |                                                                                        |

1  
2  
3 **13. Please think back about your last male patients with moderate to severe Rheumatoid**  
4 **Arthritis/Crohn's Disease that were initiated on treatment by you.**

5  
6 **Other than disease related topics, which of the following topics did you discuss with these**  
7 **patients?.**

8  
9  
10 *[Question type: Multiple response]*

11 *[Randomisation: Yes]*

12  
13  
14  
15 LAST 3 MALE PATIENTS YOUNGER THAN 45 YEARS *[only show if Q10 "Male younger than 45 years*  
16 *old" > 0]*

- 17  
18  Ability to gain/maintain employment  
19  Emotional wellbeing of the patient  
20  Social life of the patient  
21  Conception / having children  
22  Sex life  
23  Sports activities  
24  Leisure / holiday  
25  Independent living of the patient  
26  Family life  
27  Finances  
28  Other (please specify)  
29  None of the above

30  
31 LAST 3 MALE PATIENTS OF 45 YEARS OR OLDER *[only show if Q10 "Male 45 years or older" > 0]*

- 32  
33  Ability to gain/maintain employment  
34  Emotional wellbeing of the patient  
35  Social life of the patient  
36  Conception / having children  
37  Sex life  
38  Sports activities  
39  Leisure / holiday  
40  Independent living of the patient  
41  Family life  
42  Finances  
43  Other (please specify)  
44  None of the above

45  
46  
47  
48 **14. Below, we have listed the topics you discussed with your last male patients with moderate to**  
49 **severe Rheumatoid Arthritis/Crohn's Disease.**

50  
51  
52 Please select the 5 topics you spent most time on, and rank them by attributing a score between 1  
53 and 5, where 1 indicates the topic you spent most time on.

54  
55 *[PN: Show text before each part of question and adjust number of topics selected when less than 5]*

56  
57 *[Question type: ranking (top 5)]*  
58  
59  
60

1  
2  
3 *Randomisation: Yes]*  
4 *[Filter: only show options selected in Q13]*  
5  
6

7 LAST 3 MALE PATIENTS YOUNGER THAN 45 YEARS (max 5)  
8

- 9  Ability to gain/maintain employment
- 10  Emotional wellbeing of the patient
- 11  Social life of the patient
- 12  Conception / having children
- 13  Sex life
- 14  Sports activities
- 15  Leisure / holiday
- 16  Independent living of the patient
- 17  Family life
- 18  Finances
- 19  Other (please specify)

20  
21 LAST 3 MALE PATIENTS OF 45 YEARS OR OLDER (max 5)  
22

- 23  Ability to gain/maintain employment
- 24  Emotional wellbeing of the patient
- 25  Social life of the patient
- 26  Conception / having children
- 27  Sex life
- 28  Sports activities
- 29  Leisure / holiday
- 30  Independent living of the patient
- 31  Family life
- 32  Finances
- 33  Other (please specify)

34  
35  
36 **15. Please think of your last male patient with whom you discussed conception / having children.**  
37

38 **Who initiated this discussion on conception / having children?**  
39

40 *[Question type: Single response]*  
41

42 *[Filter: only show if "Conception / having children" is selected in Q0]*  
43

- 44  I initiated this discussion
- 45  The patient initiated this discussion
- 46  I don't remember who initiated this discussion
- 47
- 48
- 49
- 50
- 51
- 52
- 53
- 54
- 55
- 56
- 57
- 58
- 59
- 60

1  
2  
3 **16. Please think back about your last female patients with moderate to severe Rheumatoid**  
4 **Arthritis/Crohn's Disease that were initiated on treatment by you.**

5  
6 **Other than disease related topics, which of the following topics did you discuss with these**  
7 **patients?**

8  
9  
10 *[Question type: Multiple response]*

11 *[Randomisation: Yes]*

12  
13  
14  
15 LAST 3 FEMALE PATIENTS YOUNGER THAN 45 YEARS *[only show if Q10 "Female younger than 45*  
16 *years old" > 0]*

- 17  
18  Ability to gain/maintain employment  
19  Emotional wellbeing of the patient  
20  Social life of the patient  
21  Conception / having children  
22  Sex life  
23  Sports activities  
24  Leisure / holiday  
25  Independent living of the patient  
26  Family life  
27  Finances  
28  Other (please specify)  
29  None of the above

30  
31 LAST 3 FEMALE PATIENTS OF 45 YEARS OR OLDER *[only show if Q10 "Female 45 years or older" > 0]*

- 32  
33  Ability to gain/maintain employment  
34  Emotional wellbeing of the patient  
35  Social life of the patient  
36  Conception / having children  
37  Sex life  
38  Sports activities  
39  Leisure / holiday  
40  Independent living of the patient  
41  Family life  
42  Finances  
43  Other (please specify)  
44  None of the above

45  
46  
47  
48 **17. Below, we have listed the topics you discussed with your last female patients with moderate**  
49 **to severe Rheumatoid Arthritis/Crohn's Disease.**

50  
51  
52 **Please select the 5 topics you spent most time on, and rank them by attributing a score between 1**  
53 **and 5, where 1 indicates the topic you spent most time on.**

54  
55 *[PN: Show text before each part of question and adjust number of topics selected when less than 5]*

56  
57 *[Question type: ranking (top 5)]*

1  
2  
3 [Randomisation: Yes]

4 [Filter: only show options selected in Q16]

5  
6  
7 LAST 3 FEMALE PATIENTS YOUNGER THAN 45 YEARS (max 5)

- 8  
9  Ability to gain/maintain employment
- 10  Emotional wellbeing of the patient
- 11  Social life of the patient
- 12  Conception / having children
- 13  Sex life
- 14  Sports activities
- 15  Leisure / holiday
- 16  Independent living of the patient
- 17  Family life
- 18  Finances
- 19  Other (please specify)

20  
21 LAST 3 PATIENTS OF 45 YEARS OR OLDER (max 5)

- 22  
23  Ability to gain/maintain employment
- 24  Emotional wellbeing of the patient
- 25  Social life of the patient
- 26  Conception / having children
- 27  Sex life
- 28  Sports activities
- 29  Leisure / holiday
- 30  Independent living of the patient
- 31  Family life
- 32  Finances
- 33  Other (please specify)

34  
35 **18. Please think of your last female patient with whom you discussed conception / having**

36 **children.**

37  
38 **Who initiated this discussion on conception / having children?**

39  
40 [Question type: Single response]

41  
42 [Filter: only show if "Conception / having children" is selected in Q6]

- 43  
44  I initiated this discussion
- 45  The patient initiated this discussion
- 46  I don't remember who initiated this discussion
- 47  
48  
49  
50  
51  
52  
53  
54  
55  
56  
57  
58  
59  
60

**QUESTIONS REGARDING FPP MANAGEMENT**

In the next chapter, we would like to ask you some questions regarding the Family Planning and Pregnancy management of your patients with moderate to severe Rheumatoid Arthritis/Crohn's Disease.

**19. How often do you consult the following channel(s) in order to look for extra information regarding Family Planning and Pregnancy issues?**

*[Question type: Single response]*

*[Randomise options]*

|                                                                                       | Always                   | Very often               | Sometimes                | Rarely                   | Never                    |
|---------------------------------------------------------------------------------------|--------------------------|--------------------------|--------------------------|--------------------------|--------------------------|
| Congresses/meetings                                                                   | <input type="checkbox"/> |
| Medical Science Liaison (MSL)                                                         | <input type="checkbox"/> |
| Sales representative                                                                  | <input type="checkbox"/> |
| Industry-sponsored symposia or meetings                                               | <input type="checkbox"/> |
| Company websites with disease management education                                    | <input type="checkbox"/> |
| Social media (e.g. Facebook, LinkedIn, Twitter) for your profession (please specify): | <input type="checkbox"/> |
| Other healthcare professionals (peers)                                                | <input type="checkbox"/> |
| Expert opinion blogs (please specify):                                                | <input type="checkbox"/> |
| Physician communities (please specify):                                               | <input type="checkbox"/> |
| KOLs (Key Opinion Leaders)                                                            | <input type="checkbox"/> |
| Online consultation                                                                   | <input type="checkbox"/> |
| Other (please specify):                                                               | <input type="checkbox"/> |

The family planning and/or pregnancy related issues, questions... your patients with moderate to severe Rheumatoid Arthritis/Crohn's Disease could have, might also be relevant for their other treating physicians.

*[Filter: only show if "Conception / having children" is selected in Q0 or Q0]*



**20. To what extent do you discuss these questions, issues... with the patient's GP?**

[Question type: Single response]

[Filter: only show if "Conception / having children" is selected in Q0 or Q0]

|                                         |                          |                          |                          |                                          |
|-----------------------------------------|--------------------------|--------------------------|--------------------------|------------------------------------------|
| 1<br>Never discuss<br>with patient's GP | 2                        | 3                        | 4                        | 5<br>Always discuss<br>with patient's GP |
| <input type="checkbox"/>                | <input type="checkbox"/> | <input type="checkbox"/> | <input type="checkbox"/> | <input type="checkbox"/>                 |

**21. To what extent do you discuss these questions, issues... with the patient's gynaecologist?**

[Question type: Single response]

[Filter: only show if "Conception / having children" is selected in Q0]

|                                                       |                          |                          |                          |                                                        |
|-------------------------------------------------------|--------------------------|--------------------------|--------------------------|--------------------------------------------------------|
| 1<br>Never discuss with<br>patient's<br>gynaecologist | 2                        | 3                        | 4                        | 5<br>Always discuss<br>with patient's<br>gynaecologist |
| <input type="checkbox"/>                              | <input type="checkbox"/> | <input type="checkbox"/> | <input type="checkbox"/> | <input type="checkbox"/>                               |

**Appendix 2****Patient Survey Questionnaire**

1. Please specify the country where you live:

- United States
- United Kingdom
- France
- Italy
- Germany
- Spain
- Other (OUT)

2. Please specify your gender:

- Male (OUT)
- Female

3. Please specify your age:

- Under 20 years (OUT)
- 20-24 years
- 25-29 years
- 30-34 years
- 35-39 years
- 40-45 years
- Over 45 years (OUT)

1  
2  
3 4. How many children have you given birth to?  
4  
5

- 6 • None
- 7 • One
- 8 • Two
- 9 • Three
- 10 • Four
- 11 • Five or more

12  
13  
14  
15  
16  
17  
18 5. Do you have an immunological condition? If so, which one? (If you have more  
19 than one of these conditions, tick the one that is most prominent)

- 20 • Rheumatoid arthritis
- 21 • Systemic lupus
- 22 • Crohn's disease
- 23 • Ulcerative colitis
- 24 • Axial spondyloarthritis
- 25 • Psoriatic arthritis
- 26 • None (OUT)
- 27 • Other (OUT)

28  
29  
30  
31  
32  
33  
34  
35  
36  
37  
38  
39 6. Are you currently taking any medication for your condition?  
40

- 41 • Yes
  - 42 • No
- 43  
44  
45  
46  
47  
48  
49  
50  
51  
52  
53  
54  
55  
56  
57  
58  
59  
60

1  
2  
3 Next, we would like to ask you a few questions around your visits to your doctor.  
4

5 7. Which doctor(s) did you visit during the last two years for your condition? (please  
6  
7 tick all that apply)

- 9 • GP
- 10
- 11 • Gynaecologist
- 12
- 13 • Rheumatologist
- 14
- 15 • Gastroenterologist
- 16
- 17 • Immunologist
- 18
- 19 • Dermatologist
- 20
- 21 • Other
- 22
- 23

24 8. During any of your last three medical appointments, did you discuss any of the  
25  
26 following topics in relation to your condition? (please tick all that apply)

- 27 • Employment
- 28
- 29 • Emotional wellbeing
- 30
- 31 • Social life
- 32
- 33 • Having children/pregnancy [if ticked, option 9 of Q11 was hidden]
- 34
- 35 • Sex life
- 36
- 37 • Sports activities
- 38
- 39 • Leisure/holiday
- 40
- 41 • Independent living
- 42
- 43 • Family life
- 44
- 45 • Finances
- 46
- 47
- 48
- 49
- 50
- 51
- 52
- 53
- 54
- 55
- 56
- 57
- 58
- 59
- 60

1  
2  
3 Finally, we would like to ask you about family planning (having children), and how you  
4  
5 discuss this during your medical appointment.  
6

7 9. Are you considering having a child/another child?

- 8  
9  
10  
11  
12
- Yes
  - No

13  
14 10. Do you consider your condition a point of concern for family planning (i.e. for  
15 your plans of having another child)?

- 16  
17  
18  
19  
20  
21
- Yes
  - No

22 11. Have you ever discussed your concerns around your condition and family  
23 planning with a healthcare professional (specialist, GP or nurse)? (please tick all  
24 that apply)  
25  
26  
27

- 28  
29  
30  
31  
32  
33  
34  
35  
36  
37  
38  
39  
40  
41  
42  
43  
44  
45  
46  
47  
48  
49  
50  
51  
52  
53  
54  
55  
56  
57  
58  
59  
60
- Yes, with my GP
  - Yes, with my gynaecologist
  - Yes, with my paediatrician
  - Yes, with my rheumatologist
  - Yes, with my gastroenterologist
  - Yes, with my immunologist
  - Yes, with my dermatologist
  - Yes, with a nurse
  - No, I haven't discussed this [this option will not appear if FPP is ticked in Q8; if ticked only Q16-23 subsequently shown]
  - Other

1  
2  
3 12. When was the last time you discussed your concerns around your condition and  
4  
5 family planning with a healthcare professional (specialist, GP or nurse)?  
6

- 7 • Less than six months ago
- 8
- 9 • Between six months and two years ago
- 10
- 11 • More than two years ago
- 12
- 13 • Don't remember
- 14

15  
16 13. Over the last five years, how frequently did you have a discussion on your  
17  
18 concerns around your condition and family planning with a healthcare  
19  
20 professional (specialist, GP or nurse)?  
21

- 22 • Every visit
- 23
- 24 • Most visits
- 25
- 26 • Occasionally, during some visits
- 27
- 28 • Just once
- 29
- 30 • Never
- 31
- 32 • Don't remember
- 33
- 34

35 14. Who initiated the last discussion around your condition and family planning?  
36

- 37 • I did
- 38
- 39 • The doctor or nurse did
- 40
- 41 • Don't remember
- 42

43 15. To what extent did that discussion settle concerns? (please rate on a scale from  
44  
45 0 to 10 where 0 = no, the discussion didn't settle my concerns at all, and 10 =  
46  
47 yes, the discussion completely settle my concerns)  
48  
49  
50  
51  
52  
53  
54  
55  
56  
57  
58  
59  
60

1  
2  
3 16. Do you intend to make family planning a discussion point during your next  
4  
5 medical appointment? (omitted in UK)  
6

- 7
- 8 • Yes, definitely
  - 9 • Yes, probably
  - 10 • Maybe
  - 11 • No, probably not
  - 12 • No, definitely not
- 13  
14  
15  
16  
17

18 *Additional questions for Phase 2 questionnaire*  
19

20 17. Which of the issues listed below prevented you from discussing your concerns  
21  
22 around your condition and family planning during your medical appointments?  
23  
24 (maximum 2)  
25

- 26
- 27 • Not enough time on behalf of my doctor or other healthcare professional
  - 28 • I forgot to bring up my concerns
  - 29 • I feel the healthcare professionals I am seeing are unable to help me here
  - 30 • The healthcare professionals I am seeing are reluctant to enter into this  
31 discussion
  - 32 • I am very worried that bringing up my concerns will trigger a change in  
33 my medication, which will make symptoms worse
  - 34 • Other
- 35  
36  
37  
38  
39  
40  
41  
42  
43  
44  
45  
46  
47  
48  
49  
50  
51  
52  
53  
54  
55  
56  
57  
58  
59  
60

1  
2  
3 18. What type of healthcare professional (specialist, GP or nurse) are you primarily  
4  
5 seeing in relation to your condition? (only 1 allowed)  
6

- 7 • GP
- 8
- 9 • Gynaecologist
- 10
- 11 • Paediatrician
- 12
- 13 • Rheumatologist
- 14
- 15 • Gastroenterologist
- 16
- 17 • Immunologist
- 18
- 19 • Dermatologist
- 20
- 21 • Nurse
- 22
- 23 • Other
- 24
- 25

26  
27 19. What type of healthcare professional (specialist, GP or nurse) are you primarily  
28  
29 seeing in relation to family planning and pregnancy? (only 1 allowed)  
30

- 31 • GP
- 32
- 33 • Gynaecologist
- 34
- 35 • Paediatrician
- 36
- 37 • Rheumatologist
- 38
- 39 • Gastroenterologist
- 40
- 41 • Immunologist
- 42
- 43 • Dermatologist
- 44
- 45 • Nurse
- 46
- 47 • Other
- 48
- 49

50 20. If you discussed your concerns around family planning and your condition with  
51  
52 several healthcare professionals (specialists, GP or nurse), how consistent would  
53  
54 you say the answers were? (please rate on a scale from 0 to 10 where 0 = the  
55  
56 answers were not consistent at all, and 10 = the answers were very consistent)  
57  
58  
59  
60



1  
2  
3 21. Which channels are you using to find information about family planning as  
4  
5 impacted by your condition? (please tick all that apply)  
6

- 7 • Family and friends
- 8
- 9 • Fellow patients
- 10
- 11 • Other pregnant women and mothers
- 12
- 13 • Twitter
- 14
- 15 • Facebook
- 16
- 17 • Specific condition related websites
- 18
- 19 • Specific pregnancy related websites
- 20
- 21 • Health blogs
- 22
- 23 • Specific condition related forums (online)
- 24
- 25 • Specific pregnancy related forums (online)
- 26
- 27 • TV
- 28
- 29 • Magazines or e-magazines
- 30
- 31 • Books or e-books
- 32
- 33 • DVDs/CDs
- 34
- 35 • Patient organisations
- 36
- 37 • Radio
- 38
- 39 • Health and wellness clubs
- 40
- 41 • Religious groups
- 42
- 43 • Condition related groups (not online)
- 44
- 45 • Other
- 46
- 47
- 48
- 49
- 50
- 51
- 52
- 53
- 54
- 55
- 56
- 57
- 58
- 59
- 60

1  
2  
3 22. Which channels are you using to engage (comment, discuss, post, share, like) in  
4 discussions around family planning as impacted by your condition? (please tick all  
5 that apply)  
6  
7  
8

- 9 • Family and friends
- 10 • Fellow patients
- 11 • Other pregnant women and mothers
- 12 • Twitter
- 13 • Facebook
- 14 • Specific condition related websites
- 15 • Specific pregnancy related websites
- 16 • Health blogs
- 17 • Specific condition related forums (online)
- 18 • Specific pregnancy related forums (online)
- 19 • Patient organisations
- 20 • Health and wellness clubs
- 21 • Religious groups
- 22 • Condition related groups (not online)
- 23 • Other

1  
2  
3 23. What is in your opinion the best way to bring up the topic of family planning and  
4  
5 your condition during a medical appointment?  
6

- 7
- 8 • I would like a healthcare professional (specialist, GP or nurse) to initiate  
9 the discussion  
10
  - 11 • I would like a healthcare professional (specialist, GP or nurse) to provide  
12 me with some informational materials about family planning and my  
13 condition  
14
  - 15 • I would prefer to initiate the discussion myself  
16
  - 17 • I would prefer not to have such discussion [GO TO END]  
18
  - 19 • Other [GO TO END]  
20  
21  
22  
23

24 24. How often would you like the topic of family planning be brought up during your  
25  
26 medical appointments?  
27

- 28
- 29 • Once is enough  
30
  - 31 • At every visit  
32
  - 33 • When changing my medication  
34
  - 35 • When taking decisions that could have an impact on my family planning  
36
  - 37 • Regularly, at least once a year  
38
  - 39 • Every time when my condition is stable enough to become pregnant  
40  
41  
42  
43  
44  
45  
46  
47  
48  
49  
50  
51  
52  
53  
54  
55  
56  
57  
58  
59  
60



**Family Planning and Pregnancy Issues for Women with Systemic Inflammatory Diseases: Patient and Physician Perspectives**

|                                 |                                                                                                                                                                                                                                                                                                                                |
|---------------------------------|--------------------------------------------------------------------------------------------------------------------------------------------------------------------------------------------------------------------------------------------------------------------------------------------------------------------------------|
| Journal:                        | <i>BMJ Open</i>                                                                                                                                                                                                                                                                                                                |
| Manuscript ID:                  | bmjopen-2013-004081.R1                                                                                                                                                                                                                                                                                                         |
| Article Type:                   | Research                                                                                                                                                                                                                                                                                                                       |
| Date Submitted by the Author:   | 18-Dec-2013                                                                                                                                                                                                                                                                                                                    |
| Complete List of Authors:       | Chakravarty, Eliza; Oklahoma Medical Research Foundation, Arthritis & Clinical Immunology Research Program, MS 50<br>Clowse, Megan; Duke University Medical Center,<br>Pushparajah, Daphnee; UCB Pharma,<br>Mertens, Sarah; UCB Pharma,<br>Gordon, Caroline; Birmingham University Medical School, Rheumatology Research Group |
| <b>Primary Subject Heading</b>: | Immunology (including allergy)                                                                                                                                                                                                                                                                                                 |
| Secondary Subject Heading:      | Rheumatology, Gastroenterology and hepatology, General practice / Family practice, Obstetrics and gynaecology, Patient-centred medicine                                                                                                                                                                                        |
| Keywords:                       | Pregnancy, Autoimmune disease, Inflammatory disease, Family Planning, Maternal medicine < OBSTETRICS                                                                                                                                                                                                                           |
|                                 |                                                                                                                                                                                                                                                                                                                                |

SCHOLARONE™  
Manuscripts

Only

1  
2  
3 **Family Planning and Pregnancy Issues for Women with Systemic Inflammatory**  
4  
5 **Diseases: Patient and Physician Perspectives**  
6  
7

8  
9 Eliza Chakravarty,<sup>1</sup> Megan E.B. Clowse,<sup>2</sup> Daphnee S. Pushparajah,<sup>3</sup> Sarah Mertens,<sup>3</sup> Caroline  
10  
11 Gordon<sup>4</sup>  
12

13  
14  
15  
16 <sup>1</sup>Oklahoma Medical Research Foundation, Oklahoma City, USA

17  
18 <sup>2</sup>Duke University Medical Center, Durham, USA

19  
20 <sup>3</sup>UCB Pharma, Brussels, Belgium

21  
22 <sup>4</sup>School of Immunity and InfecAtion, College of Medical and Dental Sciences, University of  
23  
24 Birmingham, Birmingham, UK  
25  
26

27  
28  
29 **Correspondence to:**

Dr Eliza Chakravarty  
Arthritis & Clinical Immunology Research Program, MS 50  
Oklahoma Medical Research Foundation  
825 N.E. 13<sup>th</sup> Street  
Oklahoma City  
OK 73104  
USA  
Telephone: +1 (405) 271-6042  
Fax: +1 (405) 271-2319  
Email: Eliza-Chakravarty@omrf.org

30  
31  
32  
33  
34  
35  
36  
37  
38  
39  
40  
41  
42 **Key Words**

43  
44  
45 Autoimmune Disease, Inflammatory Disease, Pregnancy, Family Planning  
46  
47

48  
49 **Word Count:** 4,139  
50  
51  
52  
53  
54  
55  
56  
57  
58  
59  
60

## Abstract

**Objectives:** To identify family planning and pregnancy (FPP) issues for female patients of child-bearing age living with a chronic inflammatory disease and to assess whether current clinical practice routinely provides adequate support to alleviate these concerns.

**Setting:** Multinational survey and an analysis of online patient activity.

**Participants:** Premenopausal women (aged 20-45 years of age; N=969) were surveyed in USA, UK, Germany, France, Italy and Spain. Rheumatologists were surveyed in Germany (N=50), France (N=50), Italy (N=50) and the USA (N=100) and gastroenterologists were also surveyed in the USA (N=100).

**Primary and Secondary Outcome Measures:** Two online surveys were undertaken to identify FPP issues for both physicians and patients. The surveys examined the frequency of dialogue on these topics between physicians and patients, alongside assessment of patient satisfaction regarding these conversations. Online analysis identified key themes for patient discussion outside their doctors' office/clinic/surgery.

**Results:** 32-56% of physicians spontaneously reported having talked about FPP with their female patients of child-bearing age. When prompted, the majority of rheumatologists (74-92%) and gastroenterologists (74%) reported having discussed conception/pregnancy with female patients; however, less than half reported consulting their patient's treating GP/gynaecologist about these topics.

1  
2  
3 The majority of patients reported their FPP-related concerns are not adequately  
4 addressed/settled during their medical appointments. Furthermore, only 30-40% of patients  
5 considered advice/information to be consistent across multiple healthcare professionals.  
6  
7  
8  
9

10  
11 Key online FPP-related patient discussions included: disease state, adverse effects,  
12 treatment, switch behaviour and wash-out requirements.  
13  
14  
15

16  
17  
18 **Conclusions:** Female patients who live with chronic inflammatory disease have important  
19 FPP concerns. The majority of patients, however, do not feel that their FPP concerns are  
20 adequately addressed in current clinical practice and report that they receive inconsistent  
21 advice from the various healthcare professionals who manage different aspects of their care.  
22  
23  
24  
25  
26  
27 There is a clear need for provision of up-to-date and consistent information/support to  
28 female patients.  
29  
30  
31  
32  
33  
34  
35  
36  
37  
38  
39  
40  
41  
42  
43  
44  
45  
46  
47  
48  
49  
50  
51  
52  
53  
54  
55  
56  
57  
58  
59  
60

## Article Summary

### Article Focus:

- To identify key family planning and pregnancy (FPP) issues for female patients of child-bearing age who live with a chronic inflammatory disease and to assess whether current clinical practice routinely provides adequate support to alleviate these concerns.

### Key Messages:

- Female patients of child-bearing years wish to discuss FPP issues in relation to their disease with their physicians but the majority of female patients who live with chronic inflammatory disease feel that their concerns are not adequately addressed.
- Physicians should initiate discussion of FPP issues with their female patients, particularly those receiving immunosuppressive treatment up to the ages of 50, and establish their expectations and concerns.
- Treating physicians should work to maintain this dialogue, at least once per year or when treatment changes, and align the advice offered to their female patients of child-bearing age with that from other physicians involved in their care.

### Strengths and Limitations:

- Strengths: investigation of both patient and physician perspectives, involvement of specialists from different areas of interest and cross-cultural investigation.
- Limitations: absence of formal survey validation, reliance upon patient self-reporting, complications associated with delivery of the survey in local languages and possible bias in netnography research due to regional differences in language usage.



## Introduction

Autoimmune and inflammatory diseases often affect women of reproductive age. Although RA becomes more common as patients age,<sup>1</sup> women are increasingly choosing to start their family later in life and treatments to control RA are now often started at a younger age. Moreover, even though only a minority proportion of RA patients are women of child-bearing age,<sup>2</sup> the high prevalence of the disease means that it does impact a significant number of young women. Many other inflammatory diseases, including ankylosing spondylitis (AS),<sup>3 4</sup> Crohn's disease (CD),<sup>5 6</sup> inflammatory bowel disease (IBD)<sup>7</sup> and systemic lupus erythematosus (SLE),<sup>8</sup> also affect a younger population and thus have a direct effect on women of child-bearing age.

Pregnancy and child rearing are important facets of life for most women. Now that improved therapies for inflammatory diseases have enabled better physical function and quality of life, many women who previously would have felt too ill to consider child-bearing are now better able to fulfil desires for family life. Family planning and pregnancy (FPP) are also important issues for this patient population as these disease states have been linked to an increased risk of adverse pregnancy outcomes,<sup>9-11</sup> including increased risk of preterm birth,<sup>12</sup> difficulty carrying to full term<sup>13</sup> and a possible reduction in fertility,<sup>14 15</sup> although there is conflicting evidence regarding the impact of inflammatory diseases on fertility.<sup>16 17</sup> Due to the impact on pregnancy outcomes, expert advice is to achieve and maintain stable low disease activity prior to conception and throughout pregnancy.<sup>18-20</sup> Some anti-inflammatory treatment options can be potentially hazardous for pregnant women to take as drugs can pass across the placenta and may affect the foetus.<sup>21</sup> Methotrexate, a common RA treatment, can be damaging to foetal development (at least at high doses)<sup>22 23</sup> whilst other disease-modifying anti-rheumatic drugs such as leflunomide have been shown to cause malformations in animal studies.<sup>24</sup>

1  
2  
3  
4  
5 However, use of medications during pregnancy is not always contraindicated and an  
6  
7 individual risk-benefit discussion should be undertaken between the patient and expert  
8  
9 physician to provide the best management of both the disease and the pregnancy.<sup>25</sup>  
10  
11 Inadequate dissemination of appropriate advice describing which drugs may be continued  
12  
13 can lead to women unnecessarily forgoing potentially helpful medications and thus suffering  
14  
15 throughout pregnancy, with the increased risk of further complications to both mother and  
16  
17 child due to the effects of active disease.<sup>26</sup> Furthermore, patients are increasingly seeking  
18  
19 additional information on the internet,<sup>27</sup> while a recent analysis of information regarding  
20  
21 medication safety on active internet sites has noted an inadequate evidence base for the  
22  
23 advice often provided and inconsistent guidance.<sup>28</sup> It is clear that communication of reliable  
24  
25 and consistent information is required to enable the correct treatment of these women  
26  
27 before and during pregnancy, and while breast-feeding. Education and information should  
28  
29 be shared by healthcare professionals dealing with these diseases, medications and  
30  
31 situations on a daily basis. Accurate, consistent information must be communicated to  
32  
33 women considering or entering pregnancy in order to support patients through this delicate  
34  
35 journey.  
36  
37  
38  
39  
40

41 Two surveys were undertaken to investigate some of these issues, one of physicians and  
42  
43 another of female patients, to identify the key concerns of both groups related to the topics  
44  
45 of FPP in inflammatory disease. The surveys were designed to gauge whether there is a gap  
46  
47 in the communication between what healthcare professionals provide in terms of  
48  
49 information/support and what patients feel that they receive. The patient survey also  
50  
51 investigated where patients go to seek additional information. Two key objectives of the  
52  
53 study were to examine the proportion of physicians who discuss FPP issues with their female  
54  
55 patients of child-bearing age and the proportion of patients who have discussed these  
56  
57  
58  
59  
60

1  
2  
3 topics, in the context of their condition, with their healthcare professional. The survey also  
4  
5 assessed the proportion of patients who feel that their concerns on this topic have been  
6  
7 satisfactorily addressed by these discussions. Here we aim to communicate the insights  
8  
9 gained from this investigation to clinicians treating women of child-bearing age, who live  
10  
11 with chronic inflammatory conditions, in order to provide advice on how best to support  
12  
13 these patients.  
14  
15

## 16 17 18 **Methods**

19  
20 This study complied with the ICC/ESOMAR, EphMRA, ABPI, MRS and BHBIA market research  
21  
22 codes of conduct, ensuring the anonymity and confidentiality of all participants.  
23

24 Respondents were paid a nominal amount, calculated using fair market value guidance, to  
25  
26 compensate for the time and effort of completing the survey.  
27  
28

### 29 30 31 *Physician Survey*

32  
33 The online physician questionnaire was delivered in two phases, the first phase (baseline)  
34  
35 was distributed in July 2012 (Europe) and September 2012 (USA), and the second phase  
36  
37 was distributed in November 2012 in both Europe and USA. The survey was delivered in the  
38  
39 local language and translations were checked for consistency against the original in English  
40  
41 by native speakers with fluency in both languages (the complete Physician Questionnaire  
42  
43 can be found online in Appendix 1). The questionnaire was designed to elicit both  
44  
45 spontaneous (open-ended question) and prompted (closed question in which FPP topics  
46  
47 were an option among other answering categories) responses. Participants were recruited  
48  
49 from the WorldOne Physician Panel. Rheumatologists were surveyed in four countries:  
50  
51 Germany (N=50), France (N=50), Italy (N=50) and the USA (N=100). Gastroenterologists  
52  
53 were surveyed in the USA (N=100). Responses were compared between phases using two-  
54  
55 sided z-tests with significance level 0.05, which corresponds to a confidence interval of 95%.  
56  
57  
58  
59  
60

1  
2  
3  
4  
5 Participating physicians had to meet the following criteria: 3 to 30 years of experience,  
6  
7  $\geq 50\%$  patient-facing time, had not participated in medical research within their specialist  
8  
9 area in the past month, were not currently a clinical investigator for a pharmaceutical  
10  
11 manufacturer and were not currently active in medical research or advertising (to avoid  
12  
13 inclusion of respondents motivated only by receipt of payment). Physicians with  
14  
15 Rheumatology as their primary specialty had to meet the following additional criteria: treat  
16  
17  $\geq 20$  RA patients per month and have  $\geq 10$  patients on biologics per month. Physicians with  
18  
19 Gastroenterology as their primary specialty had to meet the following additional criteria:  
20  
21 treat  $\geq 8$  CD patients per month and have  $\geq 2$  patients on biologics per month. These  
22  
23 selection criteria were applied to ensure participating physicians had sufficient experience  
24  
25 treating patients with systemic inflammatory disease in order to provide informative results,  
26  
27 while also seeking to include physicians with a range of experience in order to investigate  
28  
29 routine clinical practice.  
30  
31  
32  
33  
34

### 35 *Patient Survey*

36  
37 The online patient questionnaire was designed according to standard market research  
38  
39 survey methodology, including scaling questions and avoiding skewed questions. The  
40  
41 questionnaire was delivered in the local language and translations were checked for  
42  
43 consistency against the original in English by native speakers with fluency in both languages  
44  
45 (the complete Patient Questionnaire can be found online in Appendix 2). The questionnaire  
46  
47 was targeted at premenopausal women (age was self-declared and the survey excluded  
48  
49 women under 20 and over 45 years of age; see Question 3 Patient Survey). A professional  
50  
51 recruitment agency was used to recruit patients from the GlobalTestMarket and MySurvey  
52  
53 online survey panels. Respondents were screened according to age, gender and disease (all  
54  
55 self-reported) and those who were  $< 20$  or  $> 45$  years old, male, or not suffering from RA,  
56  
57  
58  
59  
60

1  
2  
3 CD or lupus were excluded. Recruited patients were then sent a link to an online survey,  
4  
5 which was followed up by a short telephone interview at a pre-arranged time.  
6  
7

8  
9 The patient questionnaire was delivered in two phases and was distributed in six countries  
10 (USA, UK, Germany, France, Italy and Spain). The first phase (baseline) consisted of 16  
11 questions and was disseminated to patients between 17<sup>th</sup> July and 15<sup>th</sup> August 2012. There  
12 were 1,069 respondents to the first phase which covered patients with RA, SLE, CD and  
13 ulcerative colitis (UC). The second phase consisted of the original 16 questions from the first  
14 phase plus an additional 8 questions included in order to avoid so-called 'false positives' (i.e.  
15 covered topics included in other questions to test consistency of response) and to provide  
16 greater insight into patients' experience in terms of medical care and needs. The second  
17 phase elicited 969 responses and was distributed between 13<sup>th</sup> October and 16<sup>th</sup> November  
18 2012 to patients with axial spondyloarthritis (axSpA) and psoriatic arthritis (PsA), in addition  
19 to RA, SLE, CD and UC patients. All responses were anonymous. The patients who were  
20 invited to participate in the two survey phases were not identical, although there may have  
21 been some overlap (responses were anonymous therefore the extent of overlap could not be  
22 determined).  
23  
24  
25  
26  
27  
28  
29  
30  
31  
32  
33  
34  
35  
36  
37  
38  
39  
40

#### 41 *Netnography Research*

42 Online discussions (English language only) relating to FPP issues were investigated using  
43 two approaches: social media monitoring, and search engine landscape/content analysis  
44 (SELA).  
45  
46  
47  
48  
49  
50

51  
52 Social media monitoring was undertaken by identifying categories of interest (defined as:  
53 'ulcerative colitis', 'systemic lupus erythematosus', 'rheumatoid arthritis', 'colitis ulcerosa',  
54 'lupus', 'regional enteritis', 'Crohn's disease') and keywords of interest (defined as:  
55  
56  
57  
58  
59  
60

1  
2  
3 'pregnancy', 'miscarriage', 'birth control', 'miscarriages', 'fertile', 'family planning', 'gestation',  
4  
5 'pregnant', 'fertility', 'pregnancy disease evolution', 'disease transfer to baby', 'breastfeeding',  
6  
7 'breast feeding', 'conception', 'conceived' and 'placental transfer'), and then combining  
8  
9 keywords together with the categories of interest to ensure coverage of all topics of interest.  
10

11  
12  
13 SELA methodology involved identification of keywords (including generic keywords/keyword  
14  
15 phrases and specific keywords/keyword phrases), assessment of keyword search volume  
16  
17 and ranking of individual sites in search engine results. The 'click through rate' was  
18  
19 combined with the 'monthly search volume' to estimate the 'share of attention index'. The  
20  
21 final keyword pool included the categories 'colitis ulcerosa', 'ulcerative colitis', 'Crohn's  
22  
23 disease', 'lupus', 'rheumatoid arthritis', 'regional enteritis' and 'systemic lupus  
24  
25 erythematosus', and the following FPP-related keywords 'gestation', 'birth control',  
26  
27 'pregnancy', 'fertility', 'miscarriage' and 'family planning'.  
28  
29  
30  
31  
32

## 33 **Results**

### 34 *Physician Survey*

35  
36  
37 Many rheumatologists and gastroenterologists spontaneously reported having discussed  
38  
39 FPP-related topics with their female patients of child-bearing age; reports were consistent  
40  
41 across all countries studied (Figure 1A). Interestingly, the number of US gastroenterologists  
42  
43 who discussed these topics with their female patients increased significantly between the  
44  
45 first and second Phases of the survey (Figure 1A). This was particularly true for fertility,  
46  
47 pregnancy and/or family planning issues specifically, in which the percentage of US  
48  
49 gastroenterologists discussing these topics increased from 67% to 79% between the two  
50  
51 Phases (significant difference, 95% confidence level; N=100 for both survey phases);  
52  
53 however there was no difference in European practice, with levels remaining at 60%.  
54  
55  
56  
57  
58  
59  
60

1  
2  
3 When prompted, the majority of rheumatologists (74-92%) and gastroenterologists (74%)  
4 reported having discussed conception/pregnancy with female patients of child-bearing age.  
5  
6 However, less than half of these physicians discussed FPP related issues with their patient's  
7  
8 treating GP (i.e. primary care physician) or gynaecologist (Figure 1B and Figure 1C; survey  
9  
10 Phase 2 data shown; see Questions 20 and 21 Physician Survey Appendix 1).  
11  
12  
13

14  
15  
16 When seeking additional information regarding FPP, community rheumatologists and  
17  
18 gastroenterologists reported currently relying on presentations and educational events at  
19  
20 congresses, other healthcare professionals and key opinion leaders as their preferred  
21  
22 sources of information.  
23  
24

### 25 26 *Patient Survey and Netnography Analysis* 27

28  
29 Patients reported that the frequency of FPP-related conversations during their medical  
30  
31 appointments was lower than their discussions about emotional well-being and employment  
32  
33 (Figure 2A), although most female patients of child-bearing age reported discussing these  
34  
35 issues at some point during their care pathway (Figure 2B).  
36  
37

38  
39 Patients currently on medication for the treatment of their condition reported being more  
40  
41 concerned about FPP issues than those not receiving medication, with 63% of those on  
42  
43 medication reporting that pregnancy was a concern compared to only 32% of patients not  
44  
45 receiving medication. In addition, the female age group with most concerns related to FPP  
46  
47 was between the ages of 30 and 34 (Figure 2C; survey Phase 2 data shown, similar trend  
48  
49 observed in Phase 1). Concern was high between the ages of 25 and 39 but decreased in  
50  
51 patients aged between 40 and 45.  
52  
53  
54  
55  
56  
57  
58  
59  
60

1  
2  
3 Patients were asked when they would prefer to discuss the topics of FPP. The survey  
4 revealed patients prefer to discuss these issues in the context of their disease and treatment  
5 whenever a decision is made that could have an impact on their family planning or ability to  
6 become pregnant (Figure 3A). Approximately a quarter feel that one conversation with their  
7 healthcare professional on this topic is enough, although some would like to discuss these  
8 topics at every visit. Furthermore, approximately a third of patients prefer to initiate  
9 conversations on this topic themselves or to obtain information from their healthcare  
10 professional when appropriate to their individual situation.  
11  
12  
13  
14  
15  
16  
17  
18  
19  
20  
21

22 Patients gave a range of reasons for not discussing FPP concerns with their healthcare  
23 provider, with the most common reason being that they forgot to mention it (Figure 3B).  
24 Other important reasons identified as barriers for discussing FPP was the impression that the  
25 healthcare professional either did not have time for discussions or that they were not the  
26 correct physician to provide advice on these topics. Importantly, some patients also reported  
27 that they choose to not discuss FPP issues as they were reluctant to change medication.  
28 Very few patients felt that their healthcare professional was reluctant to discuss these  
29 topics. Over a quarter of respondents indicated that they had 'other' reasons for not  
30 discussing these issues with their doctor (Figure 3B). A higher proportion (39%) of patients  
31 aged 40-45 years recorded 'other' reasons for not discussing FPP issues with their doctor,  
32 compared to younger patients ('other' was recorded by 21.7% of 20-24 year olds, 18.3% of  
33 25-29 year olds, 18.7% of 30-34 year olds and 25.6% 35-39 year olds).  
34  
35  
36  
37  
38  
39  
40  
41  
42  
43  
44  
45  
46  
47  
48  
49

50 Patients report a preference for seeking information regarding FPP from their gynaecologist  
51 (Figure 4A), whereas disease specialists (e.g. rheumatologist or gastroenterologist) are their  
52 key contact point for management of their chronic condition (Figure 4B). GPs/primary care  
53 physicians were also identified by patients as central to their discussions of both FPP and  
54  
55  
56  
57  
58  
59  
60



1  
2  
3 their chronic condition (Figure 4A-B). It should be noted, however, that patient reports of a  
4 preference for one specialist over another regarding FPP discussions could be expected to  
5 vary by country given differences in treatment practices. For example, in the USA patients  
6 may commonly visit a gynaecologist/obstetrician for all pregnancy care whereas in the UK  
7 the patient's GP and local midwife may oversee most of their pregnancy planning and  
8 management. In addition, when responding to the survey some, but not all, patients may  
9 have regarded the terms 'obstetrician' and 'gynaecologist' as interchangeable based on their  
10 own experience.  
11  
12  
13  
14  
15  
16  
17  
18  
19  
20  
21

22 Other than their doctors' office/clinic/surgery, patients reported researching and discussing  
23 information regarding FPP through multiple channels (Figure 4C): predominantly on disease-  
24 related websites and with family and friends. In addition, patients reported that specific  
25 condition-related forums/patient organisations did not play a prominent part in their search  
26 for online information on these topics. A number of key themes, such as discussions around  
27 disease state, adverse effects, treatment, switch behaviour and wash-out requirements,  
28 emerged after following online patient activity. Other themes noted were patient emotions  
29 and feelings, interactions with healthcare professionals, how best to identify the correct  
30 healthcare professional for their treatment, concerns about inconsistent advice, infertility,  
31 sexuality and conception, disease carry-over to the baby, placental transfer of treatments  
32 and breastfeeding.  
33  
34  
35  
36  
37  
38  
39  
40  
41  
42  
43  
44  
45  
46  
47

48 Importantly, approximately 30-55% of female patients reported that their concerns relating  
49 to FPP are not adequately addressed or settled during their medical appointments (data  
50 from patient survey Phase 2). Some variability in this response was observed across  
51 countries, with 30% of patients from the USA, 34% from Italy, 35% from Spain, 39% from  
52 the UK, 43% from France and 54% from Germany reporting their concerns were not settled  
53  
54  
55  
56  
57  
58  
59  
60

1  
2  
3 (data from patient survey Phase 2). Patients also reported that consistency of advice and  
4 information given by multiple healthcare professionals, including nurses, was low with only  
5 about 30-40% of patients reporting consistent advice. Again, responses to this question  
6 varied across countries with 33% of patients reporting consistent advice from Spain and the  
7 UK, 36% from Germany and Italy, 40% from the USA and 41% from France (data from  
8 patient survey Phase 2). Inconsistent advice was reported by about 30-50% of patients  
9 overall: 27% from Italy, 32% from Spain, 38% from France, 41% from the USA, 44% from  
10 Germany and 49% from the UK (remaining patients selected a neutral response to this  
11 question; data from patient survey Phase 2).  
12  
13  
14  
15  
16  
17  
18  
19  
20  
21  
22  
23

## 24 Discussion

25  
26 The investigation described here was carried out to illuminate some of the issues  
27 surrounding FPP for female patients of child-bearing age who live with chronic inflammatory  
28 diseases. Recently it was reported that almost half of female IBD patients feel their disease  
29 and/or treatment influences their decisions about FPP but despite this about two thirds had  
30 not discussed these issues with their doctor.<sup>29</sup> The results from the current study confirmed  
31 that FPP are considered important issues by this group of female patients and that there are  
32 key gaps in communication which result in inconsistent advice and subsequent patient  
33 concern/confusion. Importantly, the majority of female patients of child-bearing age  
34 reported that current clinical practice does not adequately address their concerns related to  
35 FPP in inflammatory disease.  
36  
37  
38  
39  
40  
41  
42  
43  
44  
45  
46  
47  
48  
49

50 Some clinical recommendations for the management of inflammatory disease during  
51 pregnancy have been published<sup>18-20 25 30</sup> and advise that clinical remission/stable low disease  
52 activity be achieved prior to conception and maintained throughout pregnancy using  
53 appropriate therapy as needed. However, in the current study few patients reported  
54  
55  
56  
57  
58  
59  
60

1  
2  
3 discussing FPP at the point their condition was stable enough to become pregnant,  
4  
5 suggesting a gap in necessary communication from physicians to patients regarding the  
6  
7 need to control disease activity prior to conception, the impact of disease activity on  
8  
9 pregnancy outcomes and the need to adjust medications during pregnancy. Indeed, a  
10  
11 general lack of patient knowledge regarding continued use of medication during pregnancy  
12  
13 was highlighted recently by a survey of female IBD patients which revealed a widespread,  
14  
15 but inaccurate, belief that all medications needed to be stopped during pregnancy.<sup>29</sup>  
16  
17 Respondents to the current patient survey also reported that inconsistencies in advice  
18  
19 regarding the use of anti-inflammatory and immunosuppressive medications during  
20  
21 pregnancy are common. Together, these results suggest a need for continuing education of  
22  
23 all specialists involved in the care of women with inflammatory disease in order to ensure  
24  
25 women understand the implications of their condition and treatment on FPP. Congress  
26  
27 presentations and associated education events were identified by physicians, specifically  
28  
29 rheumatologists and gastroenterologists, as their currently preferred source of information  
30  
31 and continuing education – which may also be applicable to other specialists. As such, these  
32  
33 events should be actively targeted to maximise and improve continued education. This  
34  
35 could, for example, include hosting discussion forums between specialists involved in  
36  
37 different aspects of care for these patients at international and national congresses. Timely  
38  
39 discussion of FPP issues is also an important consideration given a high percentage of  
40  
41 pregnancies are unplanned.<sup>31</sup>  
42  
43  
44  
45  
46  
47

48 GPs/primary care physicians and gynaecologists were identified by patients as frequently  
49  
50 central to their discussions on FPP issues, although research has previously shown that 41%  
51  
52 of GPs do not initiate discussion of FPP with female patients affected by IBD.<sup>29</sup> Importantly a  
53  
54 gap in communication was identified between these physicians and the specialists who treat  
55  
56 chronic inflammatory diseases. As such, improved cross-specialty communication should be  
57  
58  
59  
60

1  
2  
3 strongly encouraged, particularly for discussions regarding planning and treatment  
4  
5 guidelines. This could involve establishment of cross-specialty teams within hospitals/centres  
6  
7 of excellence to co-ordinate care of pregnant women living with systemic inflammatory  
8  
9 disease. A recent survey of GPs in Ireland did show that the majority of GPs report seeking  
10  
11 additional advice on FPP issues, in relation to their female IBD patients, from tertiary  
12  
13 specialists<sup>29</sup> so improved education for all specialties and fostering communication should  
14  
15 assist dissemination of information and consistent advice for patients. Furthermore, all of  
16  
17 those involved in the care of female patients of child-bearing age who live with chronic  
18  
19 inflammatory disease, not only the immunological disease specialists, should be exposed to  
20  
21 continued education on this topic. Another recent survey of rheumatologists and  
22  
23 obstetricians showed that there is variability in advice given to patients concerning the use  
24  
25 of specific medication during pregnancy.<sup>32</sup> This highlights a need for consistency amongst  
26  
27 clinicians to achieve quality patient care. Development of cross-specialty international  
28  
29 guidelines/consensus papers by relevant expert physicians may help bridge these gaps in  
30  
31 communication. Furthermore, publication of evidence-based discussions of the risks and  
32  
33 benefits of medication use and disease activity control during pregnancy in women with  
34  
35 inflammatory diseases by relevant medical societies could provide an easily accessible  
36  
37 resource for physicians and patients alike. These could be in the form of “white papers” and  
38  
39 accompanying patient information pieces, published in the scientific literature and online, to  
40  
41 provide consistent education and advice for cross-specialty physicians and their patients.  
42  
43  
44  
45  
46  
47

48 In order to improve the dissemination of information regarding FPP to patients, it is  
49  
50 important to identify when patients prefer to receive such information and also why this  
51  
52 information may not be adequately communicated. Patient preference regarding timing of  
53  
54 discussions about FPP varied. This variability may be due to the personal nature of this  
55  
56 topic, differences in retention of information and differences in healthcare services/societal  
57  
58  
59  
60

1  
2  
3 norms across different countries. Patients did, however, generally report that they wished to  
4 discuss FPP-related issues with their specialist physician (i.e. rheumatologist or  
5 gastroenterologist) every time a decision was made that could impact upon their FPP. As  
6 such, healthcare professionals should routinely consider any issues that affect fertility or  
7 pregnancy and offer to have a conversation with their patient regarding these issues at  
8 every clinic visit, unless it is known not to be relevant. It may also be useful to clarify patient  
9 expectations for support and advice during these discussions. Patients on medication were  
10 more concerned about FPP issues than those not receiving medication, as were female  
11 patients between the ages of approximately 25 and 40. The high level of concern in both of  
12 these groups highlights these patients as key populations requiring additional consideration,  
13 although it could be argued that all women of child-bearing age should be targeted for such  
14 communications.

15  
16  
17  
18  
19  
20  
21  
22  
23  
24  
25  
26  
27  
28  
29  
30  
31 The most common reason patients offered to explain why they did not raise FPP with their  
32 healthcare provider was that they forgot to mention it during their consultation. Many also  
33 stated they avoided such discussion as they did not want to change their medication,  
34 implying that a fear of destabilising their disease could influence the preparedness of  
35 patients to discuss FPP topics. Other key reasons identified were the impression that their  
36 physician did not have time for the discussion or that they felt their treating physician was  
37 not the correct physician to consult on these topics. Consequently, physicians should  
38 consider periodically raising the issue themselves, particularly when treatment decisions or  
39 disease activity could impact FPP plans. Notably over a quarter of respondents indicated that  
40 they had 'other' reasons for not discussing these issues with their doctor. It is possible that  
41 this high response was due to patient demographics (e.g. age, social background or current  
42 use of contraception) and patients considering their family already complete. Indeed, a  
43 higher proportion of older patients recorded 'other' reasons for not discussing FPP issues  
44  
45  
46  
47  
48  
49  
50  
51  
52  
53  
54  
55  
56  
57  
58  
59  
60

1  
2  
3 with their doctor compared to younger patients. Patient emotions was an important theme  
4 identified for online discussions, perhaps particularly relevant for those with a history of  
5 miscarriage/stillbirth or infertility problems, and it should also be considered that such  
6 associations could be a factor underlying why some patients reported that they did not  
7 discuss FPP with their physician for 'other' reasons.  
8  
9  
10  
11  
12

13  
14  
15  
16 Of key importance, many female patients of child-bearing age reported that they did not feel  
17 that their concerns relating to FPP in the context of their disease were adequately addressed  
18 during their medical appointments. There was some variability in patient response across  
19 countries to this question, suggesting that cultural differences and differences in healthcare  
20 system structure may contribute to the variability in patient satisfaction. However, it is clear  
21 that there can be a definite improvement in the response to these issues and all healthcare  
22 professionals should consider how they could increase such communication and support to  
23 their patients. This could include provision of better patient educational material and advice  
24 on reliable and up-to-date websites containing FPP-related information. Indeed, patients  
25 reported that they frequently sought information online, although specific condition-related  
26 forums/patient organisations did not appear to be common sources of this information.  
27  
28 Furthermore, the online landscape was fragmented by disease area, with no specific  
29 resource (beyond "Motherisk"; [www.motherisk.org](http://www.motherisk.org)) that provides FPP guidance on common  
30 autoimmune conditions and medication use affecting women in the reproductive age group.  
31 As such, development of a single site with consistent up-to-date guidance covering topics  
32 identified by patients as key interests would probably be of great value. Alternatively patient  
33 and/or physician organisations could incorporate more detailed information and advice on  
34 their websites to offer improved support to concerned patients and the various physicians  
35 involved in their care during pregnancy. Another key improvement would be increased  
36 dialogue, by telephone, letters or e-mail, between the varied physicians involved in an  
37  
38  
39  
40  
41  
42  
43  
44  
45  
46  
47  
48  
49  
50  
51  
52  
53  
54  
55  
56  
57  
58  
59  
60

1  
2  
3 individual patient's care in order to provide coordinated advice and support. Together these  
4  
5 measures would aim to improve patient support and satisfaction.  
6  
7

8  
9 It should be noted that this study does have some limitations. Two important limitations of  
10  
11 the patient survey were an absence of formal survey validation and the reliance upon self-  
12  
13 reporting of diagnosis by patients. It should also be considered that patients who are willing  
14  
15 and motivated to complete a questionnaire may differ significantly from the overall patient  
16  
17 population. Furthermore, even though the surveys were translated into local languages,  
18  
19 differences in terminology and healthcare system structure exist across countries which  
20  
21 could impact pooling of results; for example, the terms obstetrician and gynaecologist could  
22  
23 be understood as being interchangeable in some countries but distinctly different specialties  
24  
25 in others meaning patient interpretation of the survey could vary. The physician survey may  
26  
27 also suffer related issues. In addition, the physician survey was only delivered to  
28  
29 gastroenterologists in the USA and did not investigate the activities of these physicians in  
30  
31 other countries. The range of experience amongst physicians was also broad which,  
32  
33 although providing good coverage of routine clinical practice, could be complicated by  
34  
35 differences in attitudes between physicians of different generations. A limitation of the  
36  
37 current study is an inability to tease out any potential influence these factors may have on  
38  
39 variation in the results. The netnography research may have been limited by use of  
40  
41 keywords common to one country/region but different in others (e.g. 'fertility' vs 'infertility')  
42  
43 which could have restricted comprehensive analysis of the online landscape and patient  
44  
45 discussions. Finally, this study did not investigate the related concerns of men suffering from  
46  
47 inflammatory disease who may be using chronic medication and also considering a family;  
48  
49 indeed this population is often understudied and may need improved support.  
50  
51  
52  
53  
54  
55  
56  
57  
58  
59  
60

1  
2  
3 In summary, FPP are extremely important issues for female patients of child-bearing age  
4 who live with chronic inflammatory disease. A summary of key considerations, highlighted  
5 by the results from the current study, for all physicians involved in the treatment of this  
6 often neglected group of patients is presented in Figure 5. It is clear that female patients of  
7 child-bearing age do wish to discuss these issues with their physicians although expectations  
8 regarding frequency of discussion and their preferred physician for advice vary considerably.  
9 Currently it appears that more can be done to provide these patients with consistent and co-  
10 ordinated information regarding their disease and how it, and associated treatments, could  
11 affect conception or pregnancy. Results from this study suggest physicians should regularly  
12 initiate discussion of these topics with their female patients of child-bearing age, particularly  
13 those on chronic medication or when changes to the treatment plan could impact pregnancy  
14 outcome, in order to improve patient support. In addition, greater cross-speciality  
15 communication between physicians involved in different aspects of the patient's care, from  
16 gastroenterologists and rheumatologists to gynaecologists/obstetricians and GPs, is needed  
17 to improve the consistency of advice offered to this often overlooked patient population.  
18  
19  
20  
21  
22  
23  
24  
25  
26  
27  
28  
29  
30  
31  
32  
33  
34  
35  
36  
37  
38  
39  
40  
41  
42  
43  
44  
45  
46  
47  
48  
49  
50  
51  
52  
53  
54  
55  
56  
57  
58  
59  
60



## Acknowledgements

This publication has been funded by UCB Pharma. The authors acknowledge InSites Consulting and ACROSS HEALTH for survey development, management and analysis. The authors also acknowledge Costello Medical Consulting for editorial and administrative support.

## Funding Statement

This work was supported by UCB Pharma

## Competing Interests Statement

EC has previously been reimbursed by UCB Pharma for consultation services; MEBC has previously been reimbursed by UCB Pharma for consultation services; DSP is an employee of UCB Pharma; SM is an employee of UCB Pharma; CG declared no competing interests.

## Author Contributions

EC: substantial contribution to conception and design, interpretation of data, drafting and critical revision of the manuscript, and final approval of the manuscript for submission.

MEBC: substantial contribution to conception and design, interpretation of data, drafting and critical revision of the manuscript, and final approval of the manuscript for submission.

DSP: substantial contribution to conception and design, interpretation of data, drafting and critical revision of the manuscript, and final approval of the manuscript for submission.

SM: substantial contribution to conception and design, acquisition, analysis and interpretation of data, critical revision of the manuscript, and final approval of the manuscript for submission.

CG: substantial contribution to conception and design, interpretation of data, drafting and critical revision of the manuscript, and final approval of the manuscript for submission.

## References

1. Symmons D, Turner G, Webb R, et al. The prevalence of rheumatoid arthritis in the United Kingdom: new estimates for a new century. *Rheumatology* 2002;41(7):793-800.
2. Symmons DP. Epidemiology of rheumatoid arthritis: determinants of onset, persistence and outcome. *Best practice & research. Clinical rheumatology* 2002;16(5):707-22.
3. Carbone LD, Cooper C, Michet CJ, et al. Ankylosing spondylitis in Rochester, Minnesota, 1935-1989. Is the epidemiology changing? *Arthritis and rheumatism* 1992;35(12):1476-82.
4. J. S, J. B. *Ankylosing Spondylitis in Clinical Practice*: Springer-Verlag London Limited, 2011.
5. Binder V. Epidemiology of IBD during the twentieth century: an integrated view. *Best practice & research. Clinical gastroenterology* 2004;18(3):463-79.
6. Gollop JH, Phillips SF, Melton LJ, et al. Epidemiologic aspects of Crohn's disease: a population based study in Olmsted County, Minnesota, 1943-1982. *Gut* 1988;29(1):49-56.
7. Loftus EV, Jr. Clinical epidemiology of inflammatory bowel disease: Incidence, prevalence, and environmental influences. *Gastroenterology* 2004;126(6):1504-17.
8. Klippel JH. Systemic lupus erythematosus: demographics, prognosis, and outcome. *The Journal of rheumatology. Supplement* 1997;48:67-71.
9. Bush MC, Patel S, Lapinski RH, et al. Perinatal outcomes in inflammatory bowel disease. *The journal of maternal-fetal & neonatal medicine : the official journal of the European Association of Perinatal Medicine, the Federation of Asia and Oceania Perinatal Societies, the International Society of Perinatal Obstet* 2004;15(4):237-41.
10. Morales M, Berney T, Jenny A, et al. Crohn's disease as a risk factor for the outcome of pregnancy. *Hepato-gastroenterology* 2000;47(36):1595-8.

- 1  
2  
3 11. Ostensen M. Sex hormones and pregnancy in rheumatoid arthritis and systemic lupus  
4 erythematosus. *Annals of the New York Academy of Sciences* 1999;876:131-43;  
5  
6 discussion 44.  
7  
8
- 9  
10 12. Baird DD, Narendranathan M, Sandler RS. Increased risk of preterm birth for women  
11 with inflammatory bowel disease. *Gastroenterology* 1990;99(4):987-94.  
12
- 13 13. van Dunne FM, Lard LR, Rook D, et al. Miscarriage but not fecundity is associated with  
14 progression of joint destruction in rheumatoid arthritis. *Annals of the rheumatic*  
15 *diseases* 2004;63(8):956-60.  
16  
17
- 18 14. Jawaheer D, Zhu JL, Nohr EA, et al. Time to pregnancy among women with rheumatoid  
19 arthritis. *Arthritis and rheumatism* 2011;63(6):1517-21.  
20  
21
- 22 15. Mayberry JF, Weterman IT. European survey of fertility and pregnancy in women with  
23 Crohn's disease: a case control study by European collaborative group. *Gut*  
24 1986;27(7):821-5.  
25  
26
- 27 16. Manosa M, Navarro-Llavat M, Marin L, et al. Fecundity, pregnancy outcomes, and  
28 breastfeeding in patients with inflammatory bowel disease: a large cohort survey.  
29 *Scandinavian journal of gastroenterology* 2013;48(4):427-32.  
30  
31
- 32 17. Vermeire S, Carbonnel F, Coulie PG, et al. Management of inflammatory bowel disease in  
33 pregnancy. *Journal of Crohn's & colitis* 2012;6(8):811-23.  
34  
35
- 36 18. Mahadevan U, Cucchiara S, Hyams JS, et al. The London Position Statement of the  
37 World Congress of Gastroenterology on Biological Therapy for IBD with the European  
38 Crohn's and Colitis Organisation: pregnancy and pediatrics. *The American journal of*  
39 *gastroenterology* 2011;106(2):214-23; quiz 24.  
40  
41
- 42 19. Ng SW, Mahadevan U. Management of inflammatory bowel disease in pregnancy. *Expert*  
43 *review of clinical immunology* 2013;9(2):161-74.  
44  
45
- 46 20. Ostensen M, Forger F. Management of RA medications in pregnant patients. *Nature*  
47 *reviews. Rheumatology* 2009;5(7):382-90.  
48  
49

- 1  
2  
3 21. Syme MR, Paxton JW, Keelan JA. Drug transfer and metabolism by the human placenta.  
4  
5 *Clinical pharmacokinetics* 2004;43(8):487-514.  
6  
7 22. Buckley LM, Bullaboy CA, Leichtman L, et al. Multiple congenital anomalies associated  
8  
9 with weekly low-dose methotrexate treatment of the mother. *Arthritis and*  
10  
11 *rheumatism* 1997;40(5):971-3.  
12  
13 23. Lloyd ME, Carr M, McElhatton P, et al. The effects of methotrexate on pregnancy, fertility  
14  
15 and lactation. *QJM : monthly journal of the Association of Physicians*  
16  
17 1999;92(10):551-63.  
18  
19 24. Brent RL. Teratogen update: reproductive risks of leflunomide (Arava); a pyrimidine  
20  
21 synthesis inhibitor: counseling women taking leflunomide before or during pregnancy  
22  
23 and men taking leflunomide who are contemplating fathering a child. *Teratology*  
24  
25 2001;63(2):106-12.  
26  
27 25. Chakravarty EF, Sanchez-Yamamoto D, Bush TM. The use of disease modifying  
28  
29 antirheumatic drugs in women with rheumatoid arthritis of childbearing age: a  
30  
31 survey of practice patterns and pregnancy outcomes. *The Journal of rheumatology*  
32  
33 2003;30(2):241-6.  
34  
35 26. Langen ES, Chakravarty EF, Liaquat M, et al. High Rate of Preterm Birth in Pregnancies  
36  
37 Complicated by Rheumatoid Arthritis. *American journal of perinatology* 2013.  
38  
39 27. Hameen-Anttila K, Jyrkka J, Enlund H, et al. Medicines information needs during  
40  
41 pregnancy: a multinational comparison. *BMJ open* 2013;3(4).  
42  
43 28. Peters SL, Lind JN, Humphrey JR, et al. Safe lists for medications in pregnancy:  
44  
45 inadequate evidence base and inconsistent guidance from Web-based information,  
46  
47 2011. *Pharmacoepidemiology and drug safety* 2013;22(3):324-8.  
48  
49 29. Toomey D, Waldron B. Family planning and inflammatory bowel disease: the patient and  
50  
51 the practitioner. *Family practice* 2013;30(1):64-8.  
52  
53  
54  
55  
56  
57  
58  
59  
60

- 1  
2  
3 30. van der Woude CJ, Kolacek S, Dotan I, et al. European evidenced-based consensus on  
4 reproduction in inflammatory bowel disease. *Journal of Crohn's & colitis*  
5 2010;4(5):493-510.  
6  
7  
8  
9 31. Finer LB, Henshaw SK. Disparities in rates of unintended pregnancy in the United States,  
10 1994 and 2001. *Perspectives on sexual and reproductive health* 2006;38(2):90-6.  
11  
12  
13 32. Panchal S, Khare M, Moorthy A, et al. Catch me if you can: a national survey of  
14 rheumatologists and obstetricians on the use of DMARDs during pregnancy.  
15 *Rheumatology international* 2013;33(2):347-53.  
16  
17  
18  
19  
20  
21  
22  
23  
24  
25  
26  
27  
28  
29  
30  
31  
32  
33  
34  
35  
36  
37  
38  
39  
40  
41  
42  
43  
44  
45  
46  
47  
48  
49  
50  
51  
52  
53  
54  
55  
56  
57  
58  
59  
60

1  
2  
3 **Figure 1.** Frequency of physician-initiated discussions regarding FPP issues with female  
4 patients and their GPs or gynaecologists (survey Phase 2 data shown in B and C)

5  
6  
7 *Abbreviations:* Ga = gastroenterologist; Rh = rheumatologist. \* $p < 0.05$  compared to Phase 1  
8  
9 (two-sided z-test with significance level 0.05)  
10

11  
12  
13 **Figure 2.** Patient reported (patient survey) topics of discussion with specialist physicians,  
14 the frequency of patient-initiated FPP discussion and the importance of FPP issues stratified  
15 by patient age (data from survey Phase 2 shown in C)  
16  
17

18  
19  
20  
21  
22 **Figure 3.** Patient preference for frequency of discussions relating to FPP issues and  
23 identification of issues that prevented discussion (data from patient survey Phase 2 shown)  
24  
25

26  
27  
28 **Figure 4.** Patient preference for choice of healthcare provider for discussions of their  
29 condition and FPP issues, and their preferred source of additional information (outside  
30 doctors' office/clinic/surgery) relating to both their condition and FPP issues (data from  
31 patient survey Phase 2 shown)  
32  
33  
34

35  
36  
37  
38 **Figure 5.** FPP-related considerations for practicing physicians treating female patients of  
39 child-bearing age who live with chronic inflammatory disease: key messages from the survey  
40 of current clinical practice and patient perceptions.  
41  
42  
43  
44  
45  
46  
47  
48  
49  
50  
51  
52  
53  
54  
55  
56  
57  
58  
59  
60

1  
2  
3 **Family Planning and Pregnancy Issues for Women with Systemic Inflammatory**  
4  
5 **Diseases: Patient and Physician Perspectives**  
6  
7  
8

9 Eliza Chakravarty,<sup>1</sup> Megan E.B. Clowse,<sup>2</sup> Daphnee S. Pushparajah,<sup>3</sup> Sarah Mertens,<sup>3</sup> Caroline  
10  
11 Gordon<sup>4</sup>  
12  
13

14  
15  
16 <sup>1</sup>Oklahoma Medical Research Foundation, Oklahoma City, USA

17  
18 <sup>2</sup>Duke University Medical Center, Durham, USA

19  
20 <sup>3</sup>UCB Pharma, Brussels, Belgium

21  
22 <sup>4</sup>School of Immunity and Infection, College of Medical and Dental Sciences, University of  
23  
24 Birmingham, Birmingham, UK  
25  
26  
27

28  
29 **Correspondence to:**

Dr Eliza Chakravarty  
Arthritis & Clinical Immunology Research Program, MS 50  
Oklahoma Medical Research Foundation  
825 N.E. 13<sup>th</sup> Street  
Oklahoma City  
OK 73104  
USA  
Telephone: +1 (405) 271-6042  
Fax: +1 (405) 271-2319  
Email: Eliza-Chakravarty@omrf.org

30  
31  
32  
33  
34  
35  
36  
37  
38  
39  
40  
41  
42 **Key Words**

43  
44  
45 Autoimmune Disease, Inflammatory Disease, Pregnancy, Family Planning  
46  
47  
48

49  
50 **Word Count:** 4,139  
51  
52

53  
54 **Funding Statement**

55  
56 This work was supported by UCB Pharma  
57  
58  
59  
60

### Competing Interests Statement

EC has previously been reimbursed by UCB Pharma for consultation services; MEBC has previously been reimbursed by UCB Pharma for consultation services; DSP is an employee of UCB Pharma; SM is an employee of UCB Pharma; CG declared no competing interests.

### Author Contributions

EC: substantial contribution to conception and design, interpretation of data, drafting and critical revision of the manuscript, and final approval of the manuscript for submission.

MEBC: substantial contribution to conception and design, interpretation of data, drafting and critical revision of the manuscript, and final approval of the manuscript for submission.

DSP: substantial contribution to conception and design, interpretation of data, drafting and critical revision of the manuscript, and final approval of the manuscript for submission.

SM: substantial contribution to conception and design, acquisition, analysis and interpretation of data, critical revision of the manuscript, and final approval of the manuscript for submission.

CG: substantial contribution to conception and design, interpretation of data, drafting and critical revision of the manuscript, and final approval of the manuscript for submission.



## Abstract

**Objectives:** To identify family planning and pregnancy (FPP) issues for female patients of child-bearing age living with a chronic inflammatory disease and to assess whether current clinical practice routinely provides adequate support to alleviate these concerns.

**Setting:** Multinational survey and an analysis of online patient activity.

**Participants:** Premenopausal women (aged 20-45 years of age; N=969) were surveyed in USA, UK, Germany, France, Italy and Spain. Rheumatologists were surveyed in Germany (N=50), France (N=50), Italy (N=50) and the USA (N=100) and gastroenterologists were also surveyed in the USA (N=100).

**Primary and Secondary Outcome Measures:** Two online surveys were undertaken to identify FPP issues for both physicians and patients. The surveys examined the frequency of dialogue on these topics between physicians and patients, alongside assessment of patient satisfaction regarding these conversations. Online analysis identified key themes for patient discussion outside their doctors' office/clinic/surgery.

**Results:** 32-56% of physicians spontaneously reported having talked about FPP with their female patients of child-bearing age. When prompted, the majority of rheumatologists (74-92%) and gastroenterologists (74%) reported having discussed conception/pregnancy with female patients; however, less than half reported consulting their patient's treating GP/gynaecologist about these topics.

1  
2  
3 The majority of patients reported their FPP-related concerns are not adequately  
4  
5 addressed/settled during their medical appointments. Furthermore, only 30-40% of patients  
6  
7 considered advice/information to be consistent across multiple healthcare professionals.  
8  
9

10  
11 Key online FPP-related patient discussions included: disease state, adverse effects,  
12  
13 treatment, switch behaviour and wash-out requirements.  
14  
15

16  
17  
18 **Conclusions:** Female patients who live with chronic inflammatory disease have important  
19  
20 FPP concerns. The majority of patients, however, do not feel that their FPP concerns are  
21  
22 adequately addressed in current clinical practice and report that they receive inconsistent  
23  
24 advice from the various healthcare professionals who manage different aspects of their care.  
25  
26 There is a clear need for provision of up-to-date and consistent information/support to  
27  
28 female patients.  
29  
30  
31  
32  
33  
34  
35  
36  
37  
38  
39  
40  
41  
42  
43  
44  
45  
46  
47  
48  
49  
50  
51  
52  
53  
54  
55  
56  
57  
58  
59  
60

## Article Summary

### Article Focus:

- To identify key family planning and pregnancy (FPP) issues for female patients of child-bearing age who live with a chronic inflammatory disease and to assess whether current clinical practice routinely provides adequate support to alleviate these concerns.

### Key Messages:

- Female patients of child-bearing years wish to discuss FPP issues in relation to their disease with their physicians but the majority of female patients who live with chronic inflammatory disease feel that their concerns are not adequately addressed.
- Physicians should initiate discussion of FPP issues with their female patients, particularly those receiving immunosuppressive treatment up to the ages of 50, and establish their expectations and concerns.
- Treating physicians should work to maintain this dialogue, at least once per year or when treatment changes, and align the advice offered to their female patients of child-bearing age with that from other physicians involved in their care.

### Strengths and Limitations:

- Strengths: investigation of both patient and physician perspectives, involvement of specialists from different areas of interest and cross-cultural investigation.
- Limitations: absence of formal survey validation, reliance upon patient self-reporting, complications associated with delivery of the survey in local languages and possible bias in netnography research due to regional differences in language usage.

## Introduction

Autoimmune and inflammatory diseases often affect women of reproductive age. Although RA becomes more common as patients age,<sup>1</sup> women are increasingly choosing to start their family later in life and treatments to control RA are now often started at a younger age. Moreover, even though only a minority proportion of RA patients are women of child-bearing age,<sup>2</sup> the high prevalence of the disease means that it does impact a significant number of young women. Many other inflammatory diseases, including ankylosing spondylitis (AS),<sup>3 4</sup> Crohn's disease (CD),<sup>5 6</sup> inflammatory bowel disease (IBD)<sup>7</sup> and systemic lupus erythematosus (SLE),<sup>8</sup> also affect a younger population and thus have a direct effect on women of child-bearing age.

Pregnancy and child rearing are important facets of life for most women. Now that improved therapies for inflammatory diseases have enabled better physical function and quality of life, many women who previously would have felt too ill to consider child-bearing are now better able to fulfil desires for family life. Family planning and pregnancy (FPP) are also important issues for this patient population as ~~multiple studies have linked~~ these disease states have been linked to an increased risk of adverse pregnancy outcomes,<sup>9-11</sup> including increased risk of preterm birth,<sup>12</sup> ~~decreased chance of conceiving,~~<sup>12</sup> difficulty carrying to full term<sup>13</sup> and a possible reduction in fertility,<sup>14 15</sup> although there is conflicting evidence regarding the impact of inflammatory diseases on fertility.<sup>16 17</sup> ~~increasing the risk of other potential complications.~~<sup>9-11</sup> Due to this the impact on pregnancy outcomes, expert advice is to achieve and maintain stable low disease activity prior to conception and throughout pregnancy.<sup>18-20</sup> Some anti-inflammatory treatment options can be potentially hazardous for pregnant women to take as drugs can pass across the placenta and may affect the foetus.<sup>21</sup> Methotrexate, a common RA treatment, can be damaging to foetal

1  
2  
3 development (at least at high doses)<sup>22 23</sup> whilst other disease-modifying anti-rheumatic drugs  
4  
5 such as leflunomide have been shown to cause malformations in animal studies.<sup>24</sup>  
6  
7

8  
9 However, use of medications during pregnancy is not always contraindicated and an  
10  
11 individual risk-benefit discussion should be undertaken between the patient and expert  
12  
13 physician to provide the best management of both the disease and the pregnancy.<sup>25</sup>  
14

15 Inadequate dissemination of appropriate advice describing which drugs may be continued  
16  
17 can lead to women unnecessarily forgoing potentially helpful medications and thus suffering  
18  
19 throughout pregnancy, with the increased risk of further complications to both mother and  
20  
21 child due to the effects of active disease.<sup>26</sup> Furthermore, patients are increasingly seeking  
22  
23 additional information on the internet,<sup>27</sup> while a recent analysis of information regarding  
24  
25 medication safety on active internet sites has noted an inadequate evidence base for the  
26  
27 advice often provided and inconsistent guidance.<sup>28</sup> It is clear that communication of reliable  
28  
29 and consistent information is required to enable the correct treatment of these women  
30  
31 before and during pregnancy, and while breast-feeding. Education and information should  
32  
33 be shared by healthcare professionals dealing with these diseases, medications and  
34  
35 situations on a daily basis. Accurate, consistent information must be communicated to  
36  
37 women considering or entering pregnancy in order to support patients through this delicate  
38  
39 journey.  
40  
41  
42  
43  
44

45 Two surveys were undertaken to investigate some of these issues, one of physicians and  
46  
47 another of female patients, to identify the key concerns of both groups related to the topics  
48  
49 of FPP in inflammatory disease. The surveys were designed to gauge whether there is a gap  
50  
51 in the communication between what healthcare professionals provide in terms of  
52  
53 information/support and what patients feel that they receive. The patient survey also  
54  
55 investigated where patients go to seek additional information. Two key objectives of the  
56  
57  
58  
59  
60

1  
2  
3 study were to examine the proportion of physicians who discuss FPP issues with their female  
4 patients of child-bearing age and the proportion of patients who have discussed these  
5 topics, in the context of their condition, with their healthcare professional. The survey also  
6 assessed the proportion of patients who feel that their concerns on this topic have been  
7 satisfactorily addressed by these discussions. Here we aim to communicate the insights  
8 gained from this investigation to clinicians treating women of child-bearing age, who live  
9 with chronic inflammatory conditions, in order to provide advice on how best to support  
10 these patients.  
11  
12  
13  
14  
15  
16  
17  
18  
19  
20  
21

## 22 **Methods**

23  
24 This study complied with the ICC/ESOMAR, EphMRA, ABPI, MRS and BHBIA market research  
25 codes of conduct, ensuring the anonymity and confidentiality of all participants.  
26

27  
28 Respondents were paid a nominal amount, calculated using fair market value guidance, to  
29 compensate for the time and effort of completing the survey.  
30  
31  
32

### 33 *Physician Survey*

34  
35 The online physician questionnaire was delivered in two phases, the first phase (baseline)  
36 was distributed in July 2012 (Europe) and September 2012 (USA), and the second phase  
37 was distributed in November 2012 in both Europe and USA. The survey was delivered in the  
38 local language and translations were checked for consistency against the original in English  
39 by native speakers with fluency in both languages (the complete Physician Questionnaire  
40 can be found online in Appendix 1). The questionnaire was designed to elicit both  
41 spontaneous (open-ended question) and prompted (closed question in which FPP topics  
42 were an option among other answering categories) responses. Participants were recruited  
43 from the WorldOne Physician Panel. Rheumatologists were surveyed in four countries:  
44 Germany (N=50), France (N=50), Italy (N=50) and the USA (N=100). Gastroenterologists  
45  
46  
47  
48  
49  
50  
51  
52  
53  
54  
55  
56  
57  
58  
59  
60

1  
2  
3 were surveyed in the USA (N=100). Responses were compared between phases using two-  
4  
5 sided z-tests with significance level 0.05, which corresponds to a confidence interval of 95%.  
6  
7

8  
9 Participating physicians had to meet the following criteria: 3 to 30 years of experience,  
10  
11  $\geq 50\%$  patient-facing time, had not participated in medical research within their specialist  
12  
13 area in the past month, were not currently a clinical investigator for a pharmaceutical  
14  
15 manufacturer and were not currently active in medical research or advertising (to avoid  
16  
17 inclusion of respondents motivated only by receipt of payment). Physicians with  
18  
19 Rheumatology as their primary specialty had to meet the following additional criteria: treat  
20  
21  $\geq 20$  RA patients per month and have  $\geq 10$  patients on biologics per month. Physicians with  
22  
23 Gastroenterology as their primary specialty had to meet the following additional criteria:  
24  
25 treat  $\geq 8$  CD patients per month and have  $\geq 2$  patients on biologics per month. These  
26  
27 selection criteria were applied to ensure participating physicians had sufficient experience  
28  
29 treating patients with systemic inflammatory disease in order to provide informative results,  
30  
31 while also seeking to include physicians with a range of experience in order to investigate  
32  
33 routine clinical practice.  
34  
35  
36  
37  
38

### 39 *Patient Survey*

40  
41 The online patient questionnaire was designed according to standard market research  
42  
43 survey methodology, including scaling questions and avoiding skewed questions. The  
44  
45 questionnaire was delivered in the local language and translations were checked for  
46  
47 consistency against the original in English by native speakers with fluency in both languages  
48  
49 (the complete Patient Questionnaire can be found online in Appendix 2). The questionnaire  
50  
51 was targeted at premenopausal women (age was self-declared and the survey excluded  
52  
53 women under 20 and over 45 years of age; see Question 3 Patient Survey). A professional  
54  
55 recruitment agency was used to recruit patients from the GlobalTestMarket and MySurvey  
56  
57  
58  
59  
60

online survey panels. Respondents were screened according to age, gender and disease (all self-reported) and those who were <20 or >45 years old, male, or not suffering from RA, CD or lupus were excluded. Recruited patients were then sent a link to an online survey, which was followed up by a short telephone interview at a pre-arranged time.

The patient questionnaire was delivered in two phases and was distributed in six countries (USA, UK, Germany, France, Italy and Spain). The first phase (baseline) consisted of 16 questions and was disseminated to patients between 17<sup>th</sup> July and 15<sup>th</sup> August 2012. There were 1,069 respondents to the first phase which covered patients with RA, SLE, CD and ulcerative colitis (UC). The second phase consisted of the original 16 questions from the first phase plus an additional 8 questions included in order to avoid so-called 'false positives' (i.e. covered topics included in other questions to test consistency of response) and to provide greater insight into patients' experience in terms of medical care and needs. The second phase elicited 969 responses and was distributed between 13<sup>th</sup> October and 16<sup>th</sup> November 2012 to patients with axial spondyloarthritis (axSpA) and psoriatic arthritis (PsA), in addition to RA, SLE, CD and UC patients. All responses were anonymous. The patients who were invited to participate in the two survey phases were not identical, although there may have been some overlap (responses were anonymous therefore the extent of overlap could not be determined).

#### *Netnography Research*

Online discussions (English language only) relating to FPP issues were investigated using two approaches: social media monitoring, and search engine landscape/content analysis (SELA).



1  
2  
3 Social media monitoring was undertaken by identifying categories of interest (defined as:  
4  
5 'ulcerative colitis', 'systemic lupus erythematosus', 'rheumatoid arthritis', 'colitis ulcerosa',  
6  
7 'lupus', 'regional enteritis', 'Crohn's disease') and keywords of interest (defined as:  
8  
9 'pregnancy', 'miscarriage', 'birth control', 'miscarriages', 'fertile', 'family planning', 'gestation',  
10  
11 'pregnant', 'fertility', 'pregnancy disease evolution', 'disease transfer to baby', 'breastfeeding',  
12  
13 'breast feeding', 'conception', 'conceived' and 'placental transfer'), and then combining  
14  
15 keywords together with the categories of interest to ensure coverage of all topics of interest.  
16  
17

18  
19  
20 SELA methodology involved identification of keywords (including generic keywords/keyword  
21  
22 phrases and specific keywords/keyword phrases), assessment of keyword search volume  
23  
24 and ranking of individual sites in search engine results. The 'click through rate' was  
25  
26 combined with the 'monthly search volume' to estimate the 'share of attention index'. The  
27  
28 final keyword pool included the categories 'colitis ulcerosa', 'ulcerative colitis', 'Crohn's  
29  
30 disease', 'lupus', 'rheumatoid arthritis', 'regional enteritis' and 'systemic lupus  
31  
32 erythematosus', and the following FPP-related keywords 'gestation', 'birth control',  
33  
34 'pregnancy', 'fertility', 'miscarriage' and 'family planning'.  
35  
36  
37  
38

## 39 **Results**

### 40 *Physician Survey*

41  
42 Many rheumatologists and gastroenterologists spontaneously reported having discussed  
43  
44 FPP-related topics with their female patients of child-bearing age; reports were consistent  
45  
46 across all countries studied (Figure 1A). Interestingly, the number of US gastroenterologists  
47  
48 who discussed these topics with their female patients increased significantly between the  
49  
50 first and second Phases of the survey (Figure 1A). This was particularly true for fertility,  
51  
52 pregnancy and/or family planning issues specifically, in which the percentage of US  
53  
54 gastroenterologists discussing these topics increased from 67% to 79% between the two  
55  
56  
57  
58  
59  
60

1  
2  
3 Phases (significant difference, 95% confidence level; N=100 for both survey phases);  
4  
5 however there was no difference in European practice, with levels remaining at 60%.  
6  
7

8  
9 When prompted, the majority of rheumatologists (74-92%) and gastroenterologists (74%)  
10 reported having discussed conception/pregnancy with female patients of child-bearing age.  
11  
12 However, less than half of these physicians discussed FPP related issues with their patient's  
13 treating GP (i.e. primary care physician) or gynaecologist (Figure 1B and Figure 1C; survey  
14 Phase 2 data shown; see Questions 20 and 21 Physician Survey Appendix 1).  
15  
16  
17  
18  
19

20  
21  
22 When seeking additional information regarding FPP, community rheumatologists and  
23 gastroenterologists reported currently relying on presentations and educational events at  
24 congresses, other healthcare professionals and key opinion leaders as their preferred  
25 sources of information.  
26  
27  
28  
29

### 30 31 32 *Patient Survey and Netnography Analysis*

33  
34 Patients reported that the frequency of FPP-related conversations during their medical  
35 appointments was lower than their discussions about emotional well-being and employment  
36  
37 (Figure 2A), although most female patients of child-bearing age (~~up to 85%~~) reported  
38 discussing these issues at some point during their care pathway (Figure 2B).  
39  
40  
41  
42  
43  
44

45  
46 Patients currently on medication for the treatment of their condition reported being more  
47 concerned about FPP issues than those not receiving medication, with 63% of those on  
48 medication reporting that pregnancy was a concern compared to only 32% of patients not  
49 receiving medication. In addition, the female age group with most concerns related to FPP  
50 was between the ages of 30 and 34, ~~with >60% of these patients reporting concerns~~  
51  
52 (Figure 2C; survey Phase 2 data shown, similar trend observed in Phase 1). Concern was  
53  
54  
55  
56  
57  
58  
59  
60

1  
2  
3 high between the ages of 25 and 39 (~~57-63%~~) but decreased ~~to 44%~~ in patients aged  
4  
5 between 40 and 45.  
6  
7

8  
9 Patients were asked when they would prefer to discuss the topics of FPP. The survey  
10  
11 revealed ~~that approximately 35% of~~ patients prefer to discuss these issues in the context of  
12  
13 their disease and treatment whenever a decision is made that could have an impact on their  
14  
15 family planning or ability to become pregnant (Figure 3A). Approximately a quarter feel that  
16  
17 one conversation with their healthcare professional on this topic is enough, although  
18  
19 ~~approximately 17% some~~ would like to discuss these topics at every visit. Furthermore,  
20  
21 approximately a third of patients prefer to initiate conversations on this topic themselves  
22  
23 ~~(30-40% patients)~~ or to obtain information from their healthcare professional when  
24  
25 appropriate to their individual situation ~~(15-35% patients)~~.  
26  
27  
28

29  
30 Patients gave a range of reasons for not discussing FPP concerns with their healthcare  
31  
32 provider, with the most common reason being that they forgot to mention it (Figure 3B).  
33  
34 Other important reasons identified as barriers for discussing FPP was the impression that the  
35  
36 healthcare professional either did not have time for discussions or that they were not the  
37  
38 correct physician to provide advice on these topics. Importantly, some patients also reported  
39  
40 that they choose to not discuss FPP issues as they were reluctant to change medication.  
41  
42 Very few patients felt that their healthcare professional was reluctant to discuss these  
43  
44 topics. Over a quarter of respondents indicated that they had 'other' reasons for not  
45  
46 discussing these issues with their doctor (Figure 3B). A higher proportion (39%) of patients  
47  
48 aged 40-45 years recorded 'other' reasons for not discussing FPP issues with their doctor,  
49  
50 compared to younger patients ('other' was recorded by 21.7% of 20-24 year olds, 18.3% of  
51  
52 25-29 year olds, 18.7% of 30-34 year olds and 25.6% 35-39 year olds).  
53  
54  
55  
56  
57  
58  
59  
60

1  
2  
3 Patients report a preference for seeking information regarding FPP from their gynaecologist  
4 (Figure 4A), whereas disease specialists (e.g. rheumatologist or gastroenterologist) are their  
5 key contact point for management of their chronic condition (Figure 4B). GPs/primary care  
6 physicians were also identified by patients as central to their discussions of both FPP and  
7 their chronic condition (Figure 4A-B). It should be noted, however, that patient reports of a  
8 preference for one specialist over another regarding FPP discussions could be expected to  
9 vary by country given differences in treatment practices. For example, in the USA patients  
10 may commonly visit a gynaecologist/obstetrician for all pregnancy care whereas in the UK  
11 the patient's GP and local midwife may oversee most of their pregnancy planning and  
12 management. In addition, when responding to the survey some, but not all, patients may  
13 have regarded the terms 'obstetrician' and 'gynaecologist' as interchangeable based on their  
14 own experience.  
15  
16  
17  
18  
19  
20  
21  
22  
23  
24  
25  
26  
27  
28  
29  
30

31 Other than their doctors' office/clinic/surgery, patients reported researching and discussing  
32 information regarding FPP through multiple channels (Figure 4C): predominantly on disease-  
33 related websites and with family and friends. In addition, patients reported that specific  
34 condition-related forums/patient organisations did not play a prominent part in their search  
35 for online information on these topics. A number of key themes, such as discussions around  
36 disease state, adverse effects, treatment, switch behaviour and wash-out requirements,  
37 emerged after following online patient activity. Other themes noted were patient emotions  
38 and feelings, interactions with healthcare professionals, how best to identify the correct  
39 healthcare professional for their treatment, concerns about inconsistent advice, infertility,  
40 sexuality and conception, disease carry-over to the baby, placental transfer of treatments  
41 and breastfeeding.  
42  
43  
44  
45  
46  
47  
48  
49  
50  
51  
52  
53  
54  
55  
56  
57  
58  
59  
60

1  
2  
3 Importantly, approximately 30-55% of female patients reported that their concerns relating  
4 to FPP are not adequately addressed or settled during their medical appointments (data  
5 from patient survey Phase 2). Some variability in this response was observed across  
6  
7 countries, with 30% of patients from the USA, 34% from Italy, 35% from Spain, 39% from  
8  
9 the UK, 43% from France and 54% from Germany reporting their concerns were not settled  
10  
11 (data from patient survey Phase 2). Patients also reported that consistency of advice and  
12  
13 information given by multiple healthcare professionals, including nurses, was low with only  
14  
15 about 30-40% of patients reporting consistent advice. Again, responses to this question  
16  
17 varied across countries with 33% of patients reporting consistent advice from Spain and the  
18  
19 UK, 36% from Germany and Italy, 40% from the USA and 41% from France (data from  
20  
21 patient survey Phase 2). Inconsistent advice was reported by about 30-50% of patients  
22  
23 overall: 27% from Italy, 32% from Spain, 38% from France, 41% from the USA, 44% from  
24  
25 Germany and 49% from the UK (remaining patients selected a neutral response to this  
26  
27 question; data from patient survey Phase 2).  
28  
29  
30  
31  
32  
33  
34

## 35 Discussion

36  
37 The investigation described here was carried out to illuminate some of the issues  
38  
39 surrounding FPP for female patients of child-bearing age who live with chronic inflammatory  
40  
41 diseases. Recently it was reported that almost half of female IBD patients feel their disease  
42  
43 and/or treatment influences their decisions about FPP but despite this about two thirds had  
44  
45 not discussed these issues with their doctor.<sup>29</sup> The results from the current study confirmed  
46  
47 that FPP are considered important issues by this group of female patients and that there are  
48  
49 key gaps in communication which result in inconsistent advice and subsequent patient  
50  
51 concern/confusion. Importantly, the majority of female patients of child-bearing age  
52  
53 reported that current clinical practice does not adequately address their concerns related to  
54  
55 FPP in inflammatory disease.  
56  
57  
58  
59  
60

1  
2  
3  
4  
5 Some clinical recommendations for the management of inflammatory disease during  
6 pregnancy have been published<sup>18-20 25 30</sup> and advise that clinical remission/stable low disease  
7 activity be achieved prior to conception and maintained throughout pregnancy using  
8 appropriate therapy as needed. However, in the current study few patients reported  
9 discussing FPP at the point their condition was stable enough to become pregnant,  
10 suggesting a gap in necessary communication from physicians to patients regarding the  
11 need to control disease activity prior to conception, the impact of disease activity on  
12 pregnancy outcomes and the need to adjust medications during pregnancy. Indeed, a  
13 general lack of patient knowledge regarding continued use of medication during pregnancy  
14 was highlighted recently by a survey of female IBD patients which revealed a widespread,  
15 but inaccurate, belief that all medications needed to be stopped during pregnancy.<sup>29</sup>  
16 Respondents to the current patient survey also reported that inconsistencies in advice  
17 regarding the use of anti-inflammatory and immunosuppressive medications during  
18 pregnancy are common. Together, these results suggest a need for continuing education of  
19 all specialists involved in the care of women with inflammatory disease in order to ensure  
20 women understand the implications of their condition and treatment on FPP. Congress  
21 presentations and associated education events were identified by physicians, specifically  
22 rheumatologists and gastroenterologists, as their currently preferred source of information  
23 and continuing education – which may also be applicable to other specialists. As such, these  
24 events should be actively targeted to maximise and improve continued education. This  
25 could, for example, include hosting discussion forums between specialists involved in  
26 different aspects of care for these patients at international and national congresses. Timely  
27 discussion of FPP issues is also an important consideration given a high percentage of  
28 pregnancies are unplanned.<sup>31</sup>  
29  
30  
31  
32  
33  
34  
35  
36  
37  
38  
39  
40  
41  
42  
43  
44  
45  
46  
47  
48  
49  
50  
51  
52  
53  
54  
55  
56  
57  
58  
59  
60

1  
2  
3 GPs/primary care physicians and gynaecologists were identified by patients as frequently  
4 central to their discussions on FPP issues, although research has previously shown that 41%  
5 of GPs do not initiate discussion of FPP with female patients affected by IBD.<sup>29</sup> Importantly a  
6 gap in communication was identified between these physicians and the specialists who treat  
7 chronic inflammatory diseases. As such, improved cross-specialty communication should be  
8 strongly encouraged, particularly for discussions regarding planning and treatment  
9  
10 guidelines. This could involve establishment of cross-specialty teams within hospitals/centres  
11 of excellence to co-ordinate care of pregnant women living with systemic inflammatory  
12 disease. A recent survey of GPs in Ireland did show that the majority of GPs report seeking  
13 additional advice on FPP issues, in relation to their female IBD patients, from tertiary  
14 specialists<sup>29</sup> so improved education for all specialties and fostering communication should  
15 assist dissemination of information and consistent advice for patients. Furthermore, all of  
16 those involved in the care of female patients of child-bearing age who live with chronic  
17 inflammatory disease, not only the immunological disease specialists, should be exposed to  
18 continued education on this topic. Another recent survey of rheumatologists and  
19 obstetricians showed that there is variability in advice given to patients concerning the use  
20 of specific medication during pregnancy.<sup>32</sup> This highlights a need for consistency amongst  
21 clinicians to achieve quality patient care. Development of cross-specialty international  
22 guidelines/consensus papers by relevant expert physicians may help bridge these gaps in  
23 communication. Furthermore, publication of evidence-based discussions of the risks and  
24 benefits of medication use and disease activity control during pregnancy in women with  
25 inflammatory diseases by relevant medical societies could provide an easily accessible  
26 resource for physicians and patients alike. These could be in the form of "white papers" and  
27 accompanying patient information pieces, published in the scientific literature and online, to  
28 provide consistent education and advice for cross-specialty physicians and their patients.  
29  
30  
31  
32  
33  
34  
35  
36  
37  
38  
39  
40  
41  
42  
43  
44  
45  
46  
47  
48  
49  
50  
51  
52  
53  
54  
55  
56  
57  
58  
59  
60

1  
2  
3 In order to improve the dissemination of information regarding FPP to patients, it is  
4 important to identify when patients prefer to receive such information and also why this  
5 information may not be adequately communicated. Patient preference regarding timing of  
6 discussions about FPP varied. This variability may be due to the personal nature of this  
7 topic, differences in retention of information and differences in healthcare services/societal  
8 norms across different countries. Patients did, however, generally report that they wished to  
9 discuss FPP-related issues with their specialist physician (i.e. rheumatologist or  
10 gastroenterologist) every time a decision was made that could impact upon their FPP. As  
11 such, healthcare professionals should routinely consider any issues that affect fertility or  
12 pregnancy and offer to have a conversation with their patient regarding these issues at  
13 every clinic visit, unless it is known not to be relevant. It may also be useful to clarify patient  
14 expectations for support and advice during these discussions. Patients on medication were  
15 more concerned about FPP issues than those not receiving medication, as were female  
16 patients between the ages of approximately 25 and 40. The high level of concern in both of  
17 these groups highlights these patients as key populations requiring additional consideration,  
18 although it could be argued that all women of child-bearing age should be targeted for such  
19 communications.

20  
21  
22  
23  
24  
25  
26  
27  
28  
29  
30  
31  
32  
33  
34  
35  
36  
37  
38  
39  
40  
41 The most common reason patients offered to explain why they did not raise FPP with their  
42 healthcare provider was that they forgot to mention it during their consultation. Many also  
43 stated they avoided such discussion as they did not want to change their medication,  
44 implying that a fear of destabilising their disease could influence the preparedness of  
45 patients to discuss FPP topics. Other key reasons identified were the impression that their  
46 physician did not have time for the discussion or that they felt their treating physician was  
47 not the correct physician to consult on these topics. Consequently, physicians should  
48 consider periodically raising the issue themselves, particularly when treatment decisions or  
49  
50  
51  
52  
53  
54  
55  
56  
57  
58  
59  
60



1  
2  
3 disease activity could impact FPP plans. Notably over a quarter of respondents indicated that  
4 they had 'other' reasons for not discussing these issues with their doctor. It is possible that  
5 this high response was due to patient demographics (e.g. age, social background or current  
6 use of contraception) and patients considering their family already complete. Indeed, a  
7 higher proportion of older patients recorded 'other' reasons for not discussing FPP issues  
8 with their doctor compared to younger patients. Patient emotions was an important theme  
9 identified for online discussions, perhaps particularly relevant for those with a history of  
10 miscarriage/stillbirth or infertility problems, and it should also be considered that such  
11 associations could be a factor underlying why some patients reported that they did not  
12 discuss FPP with their physician for 'other' reasons.  
13  
14  
15  
16  
17  
18  
19  
20  
21  
22  
23

24  
25  
26 Of key importance, many female patients of child-bearing age reported that they did not feel  
27 that their concerns relating to FPP in the context of their disease were adequately addressed  
28 during their medical appointments. There was some variability in patient response across  
29 countries to this question, suggesting that cultural differences and differences in healthcare  
30 system structure may contribute to the variability in patient satisfaction. However, it is clear  
31 that there can be a definite improvement in the response to these issues and all healthcare  
32 professionals should consider how they could increase such communication and support to  
33 their patients. This could include provision of better patient educational material and advice  
34 on reliable and up-to-date websites containing FPP-related information. Indeed, patients  
35 reported that they frequently sought information online, although specific condition-related  
36 forums/patient organisations did not appear to be common sources of this information.  
37  
38  
39

40  
41 Furthermore, the online landscape was fragmented by disease area, with no specific  
42 resource (beyond "Motherisk"; [www.motherisk.org](http://www.motherisk.org)) that provides FPP guidance on common  
43 autoimmune conditions and medication use affecting women in the reproductive age group.  
44  
45  
46  
47  
48  
49  
50  
51  
52  
53  
54  
55  
56  
57  
58  
59  
60

1  
2  
3 identified by patients as key interests would probably be of great value. Alternatively patient  
4  
5 and/or physician organisations could incorporate more detailed information and advice on  
6  
7 their websites to offer improved support to concerned patients and the various physicians  
8  
9 involved in their care during pregnancy. Another key improvement would be increased  
10  
11 dialogue, by telephone, letters or e-mail, between the varied physicians involved in an  
12  
13 individual patient's care in order to provide coordinated advice and support. Together these  
14  
15 measures would aim to improve patient support and satisfaction.  
16  
17

18  
19  
20 It should be noted that this study does have some limitations. Two important limitations of  
21  
22 the patient survey were an absence of formal survey validation and the reliance upon self-  
23  
24 reporting of diagnosis by patients. It should also be considered that patients who are willing  
25  
26 and motivated to complete a questionnaire may differ significantly from the overall patient  
27  
28 population. Furthermore, even though the surveys were translated into local languages,  
29  
30 differences in terminology and healthcare system structure exist across countries which  
31  
32 could impact pooling of results; for example, the terms obstetrician and gynaecologist could  
33  
34 be understood as being interchangeable in some countries but distinctly different specialties  
35  
36 in others meaning patient interpretation of the survey could vary. The physician survey may  
37  
38 also suffer related issues. In addition, the physician survey was only delivered to  
39  
40 gastroenterologists in the USA and did not investigate the activities of these physicians in  
41  
42 other countries. The range of experience amongst physicians was also broad which,  
43  
44 although providing good coverage of routine clinical practice, could be complicated by  
45  
46 differences in attitudes between physicians of different generations. A limitation of the  
47  
48 current study is an inability to tease out any potential influence these factors may have on  
49  
50 variation in the results. The netnography research may have been limited by use of  
51  
52 keywords common to one country/region but different in others (e.g. 'fertility' vs 'infertility')  
53  
54 which could have restricted comprehensive analysis of the online landscape and patient  
55  
56  
57  
58  
59  
60

1  
2  
3 discussions. Finally, this study did not investigate the related concerns of men suffering from  
4  
5 inflammatory disease who may be using chronic medication and also considering a family;  
6  
7 indeed this population is often understudied and may need improved support.  
8  
9

10  
11 In summary, FPP are extremely important issues for female patients of child-bearing age  
12  
13 who live with chronic inflammatory disease. A summary of key considerations, highlighted  
14  
15 by the results from the current study, for all physicians involved in the treatment of this  
16  
17 often neglected group of patients is presented in Figure 5. It is clear that female patients of  
18  
19 child-bearing age do wish to discuss these issues with their physicians although expectations  
20  
21 regarding frequency of discussion and their preferred physician for advice vary considerably.  
22  
23 Currently it appears that more can be done to provide these patients with consistent and co-  
24  
25 ordinated information regarding their disease and how it, and associated treatments, could  
26  
27 affect conception or pregnancy. Results from this study suggest physicians should regularly  
28  
29 initiate discussion of these topics with their female patients of child-bearing age, particularly  
30  
31 those on chronic medication or when changes to the treatment plan could impact pregnancy  
32  
33 outcome, in order to improve patient support. In addition, greater cross-speciality  
34  
35 communication between physicians involved in different aspects of the patient's care, from  
36  
37 gastroenterologists and rheumatologists to gynaecologists/obstetricians and GPs, is needed  
38  
39 to improve the consistency of advice offered to this often overlooked patient population.  
40  
41  
42  
43  
44

#### 45 **Acknowledgements**

46  
47 This publication has been funded by UCB Pharma. The authors acknowledge InSites  
48  
49 Consulting and ACROSS HEALTH for survey development, management and analysis. The  
50  
51 authors also acknowledge Costello Medical Consulting for editorial and administrative  
52  
53 support.  
54  
55  
56  
57  
58  
59  
60

## References

1. Symmons D, Turner G, Webb R, Asten P, Barrett E, Lunt M, et al. The prevalence of rheumatoid arthritis in the United Kingdom: new estimates for a new century. *Rheumatology* 2002;41(7):793-800.
2. Symmons DP. Epidemiology of rheumatoid arthritis: determinants of onset, persistence and outcome. *Best practice & research. Clinical rheumatology* 2002;16(5):707-22.
3. Carbone LD, Cooper C, Michet CJ, Atkinson EJ, O'Fallon WM, Melton LJ, 3rd. Ankylosing spondylitis in Rochester, Minnesota, 1935-1989. Is the epidemiology changing? *Arthritis and rheumatism* 1992;35(12):1476-82.
4. J. S, J. B. *Ankylosing Spondylitis in Clinical Practice*: Springer-Verlag London Limited, 2011.
5. Binder V. Epidemiology of IBD during the twentieth century: an integrated view. *Best practice & research. Clinical gastroenterology* 2004;18(3):463-79.
6. Gollop JH, Phillips SF, Melton LJ, 3rd, Zinsmeister AR. Epidemiologic aspects of Crohn's disease: a population based study in Olmsted County, Minnesota, 1943-1982. *Gut* 1988;29(1):49-56.
7. Loftus EV, Jr. Clinical epidemiology of inflammatory bowel disease: Incidence, prevalence, and environmental influences. *Gastroenterology* 2004;126(6):1504-17.
8. Klippel JH. Systemic lupus erythematosus: demographics, prognosis, and outcome. *The Journal of rheumatology. Supplement* 1997;48:67-71.
9. Bush MC, Patel S, Lapinski RH, Stone JL. Perinatal outcomes in inflammatory bowel disease. *The journal of maternal-fetal & neonatal medicine : the official journal of the European Association of Perinatal Medicine, the Federation of Asia and Oceania Perinatal Societies, the International Society of Perinatal Obstet* 2004;15(4):237-41.
10. Morales M, Berney T, Jenny A, Morel P, Extermann P. Crohn's disease as a risk factor for the outcome of pregnancy. *Hepato-gastroenterology* 2000;47(36):1595-8.

- 1  
2  
3 11. Ostensen M. Sex hormones and pregnancy in rheumatoid arthritis and systemic lupus  
4 erythematosus. *Annals of the New York Academy of Sciences* 1999;876:131-43;  
5 discussion 44.  
6  
7
- 8  
9 12. Baird DD, Narendranathan M, Sandler RS. Increased risk of preterm birth for women  
10 with inflammatory bowel disease. *Gastroenterology* 1990;99(4):987-94.  
11
- 12 13. van Dunne FM, Lard LR, Rook D, Helmerhorst FM, Huizinga TW. Miscarriage but not  
13 fecundity is associated with progression of joint destruction in rheumatoid arthritis.  
14 *Annals of the rheumatic diseases* 2004;63(8):956-60.  
15
- 16 14. Jawaheer D, Zhu JL, Nohr EA, Olsen J. Time to pregnancy among women with  
17 rheumatoid arthritis. *Arthritis and rheumatism* 2011;63(6):1517-21.  
18
- 19 15. Mayberry JF, Weterman IT. European survey of fertility and pregnancy in women with  
20 Crohn's disease: a case control study by European collaborative group. *Gut*  
21 1986;27(7):821-5.  
22
- 23 16. Manosa M, Navarro-Llavat M, Marin L, Zabana Y, Cabre E, Domenech E. Fecundity,  
24 pregnancy outcomes, and breastfeeding in patients with inflammatory bowel disease:  
25 a large cohort survey. *Scandinavian journal of gastroenterology* 2013;48(4):427-32.  
26
- 27 17. Vermeire S, Carbonnel F, Coulie PG, Geenen V, Hazes JM, Masson PL, et al.  
28 Management of inflammatory bowel disease in pregnancy. *Journal of Crohn's &*  
29 *colitis* 2012;6(8):811-23.  
30
- 31 18. Mahadevan U, Cucchiara S, Hyams JS, Steinwurz F, Nuti F, Travis SP, et al. The London  
32 Position Statement of the World Congress of Gastroenterology on Biological Therapy  
33 for IBD with the European Crohn's and Colitis Organisation: pregnancy and  
34 pediatrics. *The American journal of gastroenterology* 2011;106(2):214-23; quiz 24.  
35
- 36 19. Ng SW, Mahadevan U. Management of inflammatory bowel disease in pregnancy. *Expert*  
37 *review of clinical immunology* 2013;9(2):161-74.  
38  
39  
40  
41  
42  
43  
44  
45  
46  
47  
48  
49  
50  
51  
52  
53  
54  
55  
56  
57  
58  
59  
60

- 1  
2  
3 20. Ostensen M, Forger F. Management of RA medications in pregnant patients. *Nature*  
4  
5 *reviews. Rheumatology* 2009;5(7):382-90.  
6  
7 21. Syme MR, Paxton JW, Keelan JA. Drug transfer and metabolism by the human placenta.  
8  
9 *Clinical pharmacokinetics* 2004;43(8):487-514.  
10  
11 22. Buckley LM, Bullaboy CA, Leichtman L, Marquez M. Multiple congenital anomalies  
12 associated with weekly low-dose methotrexate treatment of the mother. *Arthritis and*  
13 *rheumatism* 1997;40(5):971-3.  
14  
15 23. Lloyd ME, Carr M, McElhatton P, Hall GM, Hughes RA. The effects of methotrexate on  
16 pregnancy, fertility and lactation. *QJM : monthly journal of the Association of*  
17 *Physicians* 1999;92(10):551-63.  
18  
19 24. Brent RL. Teratogen update: reproductive risks of leflunomide (Arava); a pyrimidine  
20 synthesis inhibitor: counseling women taking leflunomide before or during pregnancy  
21 and men taking leflunomide who are contemplating fathering a child. *Teratology*  
22 2001;63(2):106-12.  
23  
24 25. Chakravarty EF, Sanchez-Yamamoto D, Bush TM. The use of disease modifying  
25 antirheumatic drugs in women with rheumatoid arthritis of childbearing age: a  
26 survey of practice patterns and pregnancy outcomes. *The Journal of rheumatology*  
27 2003;30(2):241-6.  
28  
29 26. Langen ES, Chakravarty EF, Liaquat M, El-Sayed YY, Druzin ML. High Rate of Preterm  
30 Birth in Pregnancies Complicated by Rheumatoid Arthritis. *American journal of*  
31 *perinatology* 2013.  
32  
33 27. Hameen-Anttila K, Jyrkka J, Enlund H, Nordeng H, Lupattelli A, Kokki E. Medicines  
34 information needs during pregnancy: a multinational comparison. *BMJ open*  
35 2013;3(4).  
36  
37 28. Peters SL, Lind JN, Humphrey JR, Friedman JM, Honein MA, Tassinari MS, et al. Safe  
38 lists for medications in pregnancy: inadequate evidence base and inconsistent  
39  
40  
41  
42  
43  
44  
45  
46  
47  
48  
49  
50  
51  
52  
53  
54  
55  
56  
57  
58  
59  
60

1  
2  
3 guidance from Web-based information, 2011. *Pharmacoepidemiology and drug*  
4  
5 *safety* 2013;22(3):324-8.  
6

7 29. Toomey D, Waldron B. Family planning and inflammatory bowel disease: the patient and  
8  
9 the practitioner. *Family practice* 2013;30(1):64-8.  
10

11 30. van der Woude CJ, Kolacek S, Dotan I, Oresland T, Vermeire S, Munkholm P, et al.  
12  
13 European evidenced-based consensus on reproduction in inflammatory bowel  
14  
15 disease. *Journal of Crohn's & colitis* 2010;4(5):493-510.  
16

17 31. Finer LB, Henshaw SK. Disparities in rates of unintended pregnancy in the United States,  
18  
19 1994 and 2001. *Perspectives on sexual and reproductive health* 2006;38(2):90-6.  
20  
21

22 32. Panchal S, Khare M, Moorthy A, Samanta A. Catch me if you can: a national survey of  
23  
24 rheumatologists and obstetricians on the use of DMARDs during pregnancy.  
25  
26 *Rheumatology international* 2013;33(2):347-53.  
27  
28  
29  
30  
31  
32  
33  
34  
35  
36  
37  
38  
39  
40  
41  
42  
43  
44  
45  
46  
47  
48  
49  
50  
51  
52  
53  
54  
55  
56  
57  
58  
59  
60

1  
2  
3 **Figure 1.** Frequency of physician-initiated discussions regarding FPP issues with female  
4 patients and their GPs or gynaecologists (survey Phase 2 data shown in B and C)

5  
6  
7 *Abbreviations:* Ga = gastroenterologist; Rh = rheumatologist. \* $p < 0.05$  compared to Phase 1  
8  
9 (two-sided z-test with significance level 0.05)

10  
11  
12  
13 **Figure 2.** Patient reported (patient survey) topics of discussion with specialist physicians,  
14 the frequency of patient-initiated FPP discussion and the importance of FPP issues stratified  
15 by patient age (data from survey Phase 2 shown in C)

16  
17  
18  
19  
20  
21  
22 **Figure 3.** Patient preference for frequency of discussions relating to FPP issues and  
23 identification of issues that prevented discussion (data from patient survey Phase 2 shown)

24  
25  
26  
27  
28 **Figure 4.** Patient preference for choice of healthcare provider for discussions of their  
29 condition and FPP issues, and their preferred source of additional information (outside  
30 doctors' office/clinic/surgery) relating to both their condition and FPP issues (data from  
31 patient survey Phase 2 shown)

32  
33  
34  
35  
36  
37  
38 **Figure 5.** FPP-related considerations for practicing physicians treating female patients of  
39 child-bearing age who live with chronic inflammatory disease: key messages from the survey  
40 of current clinical practice and patient perceptions.  
41  
42  
43  
44  
45  
46  
47  
48  
49  
50  
51  
52  
53  
54  
55  
56  
57  
58  
59  
60



1  
2  
3  
4  
5  
6  
7  
8  
9  
10  
11  
12  
13  
14  
15  
16  
17  
18  
19  
20  
21  
22  
23  
24  
25  
26  
27  
28  
29  
30  
31  
32  
33  
34  
35  
36  
37  
38  
39  
40  
41  
42  
43  
44  
45  
46  
47  
48  
49  
50  
51  
52  
53  
54  
55  
56  
57  
58  
59  
60

**A) Proportion of physicians who report having discussed family planning topics with female patients of child-bearing age (last 3 patients were considered)**

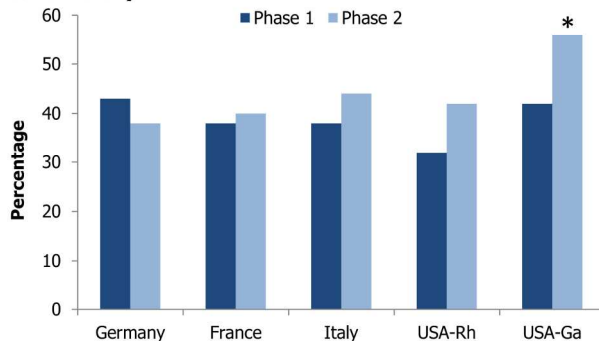

**B) To what extent did you discuss these questions, issues...with the patient's GP? [see Question 20 of the Physician Survey, Appendix 1]**

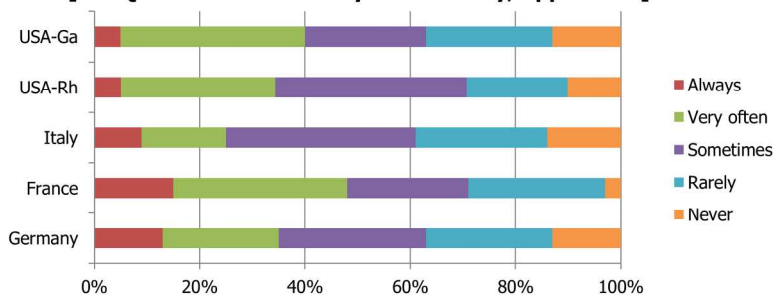

**C) To what extent did you discuss these questions, issues...with the patient's gynaecologist? [see Question 21 of the Physician Survey, Appendix 1]**

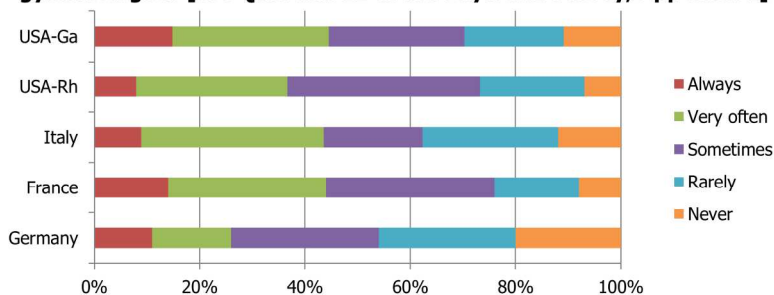

Figure 1. Frequency of physician-initiated discussions regarding FPP issues with female patients and their GPs or gynaecologists (survey Phase 2 data shown in B and C) Abbreviations: Ga = gastroenterologist; Rh = rheumatologist. \*p<0.05 compared to Phase 1 (two-sided z-test with significance level 0.05)  
217x306mm (300 x 300 DPI)

**A) Topics discussed during any of the last three medical appointments**

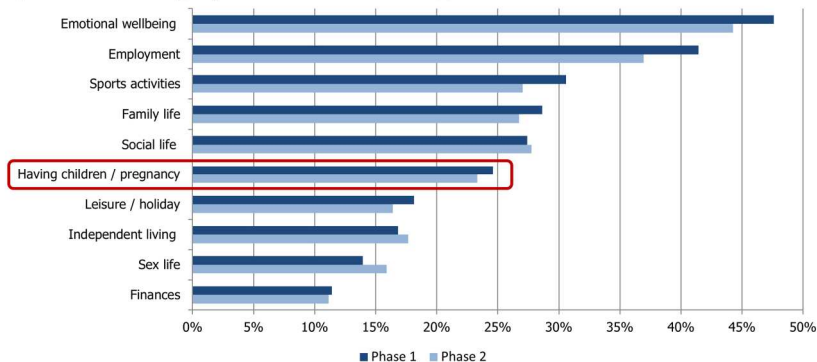

**B) Have family planning concerns ever been discussed?**

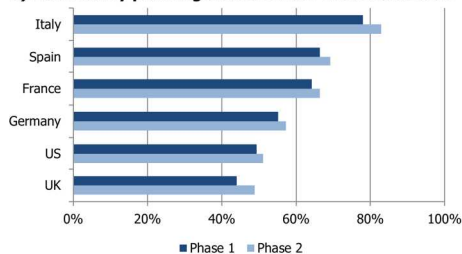

**C) Are family planning issues of concern?**

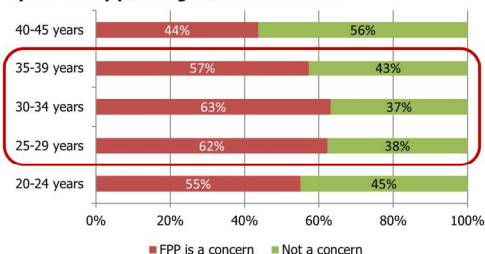

Figure 2. Patient reported (patient survey) topics of discussion with specialist physicians, the frequency of patient-initiated FPP discussion and the importance of FPP issues stratified by patient age (data from survey Phase 2 shown in C).  
180x128mm (300 x 300 DPI)

1  
2  
3  
4  
5  
6  
7  
8  
9  
10  
11  
12  
13  
14  
15  
16  
17  
18  
19  
20  
21  
22  
23  
24  
25  
26  
27  
28  
29  
30  
31  
32  
33  
34  
35  
36  
37  
38  
39  
40  
41  
42  
43  
44  
45  
46  
47  
48  
49  
50  
51  
52  
53  
54  
55  
56  
57  
58  
59  
60

**A) How often would you like the topic of family planning to be brought up during your medical appointments?**



**B) Issues that prevented a discussion**



Figure 3. Patient preference for frequency of discussions relating to FPP issues and identification of issues that prevented discussion (data from patient survey Phase 2 shown).  
180x126mm (300 x 300 DPI)

View only

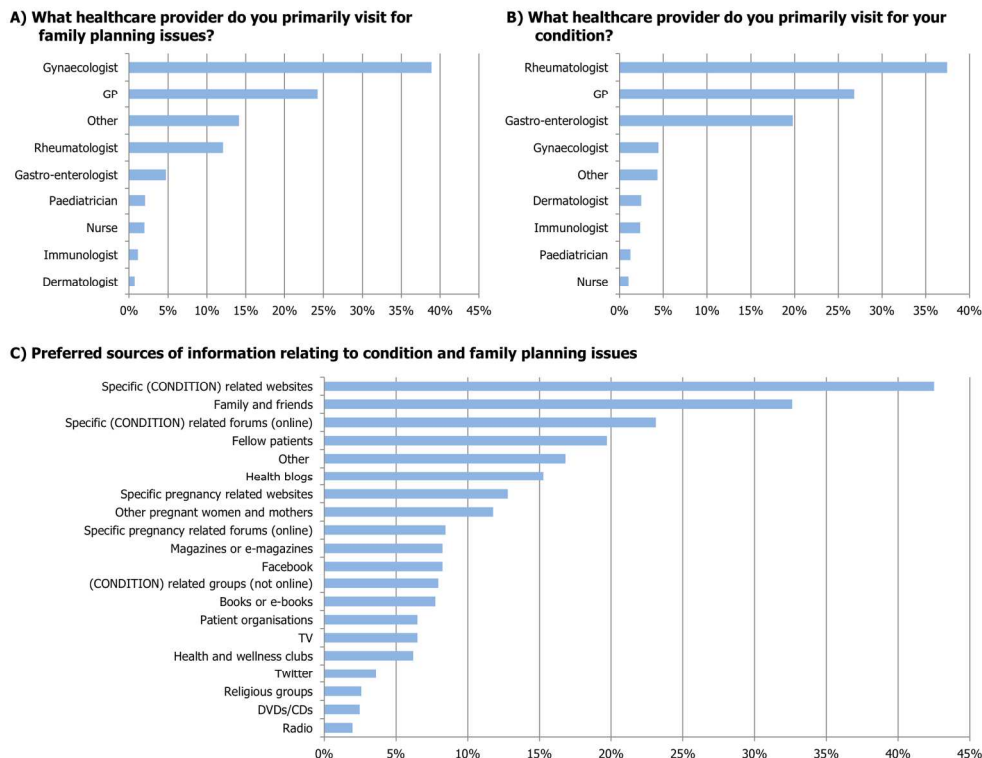

Figure 4. Patient preference for choice of healthcare provider for discussions of their condition and FPP issues, and their preferred source of additional information (outside doctors' office/clinic/surgery) relating to both their condition and FPP issues (data from patient survey Phase 2 shown).  
180x138mm (300 x 300 DPI)

1  
2  
3  
4  
5  
6  
7  
8  
9  
10  
11  
12  
13  
14  
15  
16  
17  
18  
19  
20  
21  
22  
23  
24  
25  
26  
27  
28  
29  
30  
31  
32  
33  
34  
35  
36  
37  
38  
39  
40  
41  
42  
43  
44  
45  
46  
47  
48  
49  
50  
51  
52  
53  
54  
55  
56  
57  
58  
59  
60

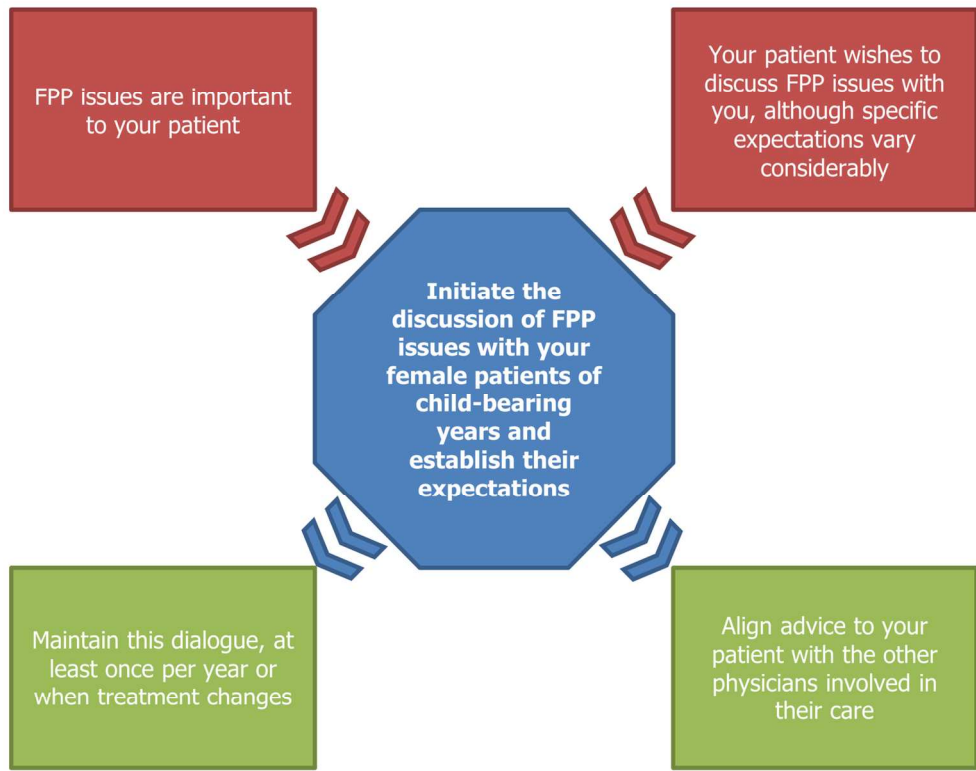

Figure 5. FPP-related considerations for practicing physicians treating female patients of child-bearing age who live with chronic inflammatory disease: key messages from the survey of current clinical practice and patient perceptions.  
145x117mm (300 x 300 DPI)

view only

## Appendix 1

### Physician Survey Questionnaire

Overview – survey flow

1. Participant profiling and screening
2. Implicit measurement of impact FPP
3. Communication testing
4. Explicit measurement of FPP related conversations

Thank you for your interest in our study. Before we begin, we would like to assure you that we act in accordance with the ESOMAR, EphMRA, ABPI, MRS and BHBIA codes of conduct regarding anonymity and confidentiality.

Any information you disclose will be treated in the strictest confidence and the results are pooled so none of the answers are attributable to individual respondents.

First we would like to ask you a few qualifying questions. This will take less than 1 minute. The questionnaire takes some 20 minutes to complete and covers the domain of Rheumatoid Arthritis/Crohn's Disease.

The market research is being conducted on behalf of a pharmaceutical company. The market research study itself is strictly non-promotional. The company commissioning this research has no access whatsoever to information regarding respondents.

If you have any problems or questions filling out this questionnaire, please feel free to contact us at [support@leadphysician.com](mailto:support@leadphysician.com).

- I hereby agree to proceed with the questionnaire on this basis. **STOP if not selected**

The participant should agree to treat with the utmost confidentiality all data and information to which he is made privy in light of and/or as a result of his participation in this study.

The participant expressly guarantees that he will not divulge said information or data, nor will third parties be granted access. He will not publish or reproduce the information, nor will he exploit it in any other way.

Only public information or information that the participant may also obtain via other legitimate means than through participation in this study are not subject to this obligation of confidentiality.

This obligation is irrevocable and remains in effect as long as the information is to be considered confidential and has, therefore, not been made public by the authorized party or parties.

- Yes, I expressly and unconditionally accept the above obligation of confidentiality.  
**STOP if not selected**

ADVERSE EVENT REPORTING: We have been asked to provide our client with details of adverse events divulged during the course of this market research. Although this is an online survey and the information you provide will of course be treated in confidence, we are still under an obligation to report any information on adverse events in specific patients, even if you have already reported said event to the company or the regulatory authorities. In this case you will be contacted with a request to waive the confidentiality provided under the market research codes of conduct specifically for this particular adverse event. All other information you provide during the course of the survey will remain confidential.

- I hereby confirm to have been informed that the organiser of the survey is under the obligation to collect and report all information on adverse events linked to the client's product as recorded by me during the course of this research. **STOP if not selected**

*[Parameters to be recorded from panel database:*

- Age
- Gender
- Region
- No Clinical investigation or pharma/biotech manufacturer (not in US)]

## **PARTICIPANT PROFILING AND SCREENING**

### **1. What is your primary specialty?**

Question type: Single response

- |                                                                                           |                     |
|-------------------------------------------------------------------------------------------|---------------------|
| <input type="checkbox"/> Gastroenterology (US only)                                       | =GASTROENTEROLOGIST |
| <input type="checkbox"/> Rheumatology                                                     | = RHEUMATOLOGIST    |
| <input type="checkbox"/> Internal medicine specialized in rheumatology (Germany only)     | = RHEUMATOLOGIST    |
| <input type="checkbox"/> Internal medicine not specialized in rheumatology (Germany only) | <b>STOP</b>         |
| <input type="checkbox"/> Other specialty                                                  | <b>STOP</b>         |

*[Gastroenterologists get questions personalized to Crohn's Disease, Rheumatologists to Rheumatoid Arthritis.]*

### **2. How long have you been IN PRACTICE since qualifying as a specialist?**

*[Question type: Open comment - numeric*

*Max score allowed: 50 ("Years" - next to box)]*

**[If < 3 or > 30 => STOP]**

### **3. What percent of your working time is dedicated to treating patients?**

1  
2  
3 [Question type: Open comment - numeric

4  
5 0 to 100%]

6  
7  
8  
9  % is dedicated to treating patients [STOP if less than 50%]

10  
11  
12  
13  
14  
15 **4. In an average month, approximately how many different patients do you see for all disorders**  
16 **and conditions and for whom you are personally involved in making treatment decisions? Please**  
17 **count each patient once, not the number of visits.**

18  
19 [Question type: Open comment - numeric

20  
21 Max score allowed: 1000]

22  
23 [STOP if <20]

24  
25

26  
27  
28  
29  
30  
31 **5. In an average month, approximately how many different patients do you see for Rheumatoid**  
32 **Arthritis (for Rheumatologists)/ Crohn's Disease (for Gastroenterologists) and for whom you are**  
33 **personally involved in making treatment decisions? Please count each patient once, not the**  
34 **number of visits.**

35  
36 [Question type: Open comment - numeric

37  
38 Max score allowed: number at S4

39  
40 Number needs to be lower or equal than in previous question.]

41  
42 [STOP if < 20 RA patients or < 8 CD patients ]

43  
44



1  
2  
3 **6. In an average month, approximately how many different patients with Rheumatoid Arthritis**  
4 **(for Rheumatologists)/ Crohn's Disease (for Gastroenterologists) do you see that are on biologic**  
5 **treatment?**  
6

7 *[Question type: Open comment - numeric]*

8  
9 *Max score allowed: Number in S5*

10  
11 *Number needs to be lower or equal than in previous question]*

12  
13 *[STOP if < 10 RA patients or < 2 CD patients]*

14  
15  
16

17  
18  
19 **7. What type of practice do you have? (tick only one)**

20  
21 *[Question type: Single response]*

- 22  
23  Office only *[STOP in France]*  
24  Hospital only  
25  Office and hospital *[(don't show in Germany)]*  
26  
27

28  
29 **8. What is the size of hospital where you carry out your regular practice?**

30  
31 *[Question type: Single response]*

32  
33 *[Show only if 'hospital' or 'office and hospital' was selected in q0]*

- 34  More than 700 beds  
35  400 to 700 beds  
36  Less than 400 beds  
37

38  
39 **9. Have you taken part in a market research study in the area of Rheumatoid Arthritis (for**  
40 **Rheumatologists)/ Crohn's Disease (for Gastroenterologists) in the last month?**

41 *[Question type: Single response]*

- 42  Yes **[STOP]**  
43  No  
44  
45

46  
47 **10. What percentage of your Rheumatoid Arthritis/Crohn's Disease patient base can be attributed**  
48 **to the following categories?**

49  
50 *[Question type: Open comment - numeric]*

51  
52 *Should add up to 100%*

53

|                                  |   |
|----------------------------------|---|
| Male younger than 45 years old   | % |
| Male 45 years or older           | % |
| Female younger than 45 years old | % |
| Female 45 years or older         | % |

54  
55  
56  
57  
58  
59  
60

**IMPLICIT MEASUREMENT OF IMPACT FPP**

In the following questions we would like to talk about the topics you discussed with your moderate to severe Rheumatoid Arthritis/Crohn’s Disease patients.

Obviously, most of the conversations are about clinical topics, but from now on we would like you to think about **non clinical nor treatment related topics**.

**11. Please think back about your last 6 [3: IF Q10\_1 OR Q10\_2=0] male patients with moderate to severe Rheumatoid Arthritis/Crohn’s Disease that were initiated on treatment by you. Which topics did you discuss with these patients?**

Please bear in mind to mention non clinical and non-treatment related topics.

[Question type: Open comment – text]

|                | Last 3 patients younger than 45 years old [only show if Q10 “Male younger than 45 years old” > 0] | Last 3 patients of 45 years or older [only show if Q10 “Male 45 years or older” > 0] |
|----------------|---------------------------------------------------------------------------------------------------|--------------------------------------------------------------------------------------|
| Male patient 1 |                                                                                                   |                                                                                      |
| Male patient 2 |                                                                                                   |                                                                                      |
| Male patient 3 |                                                                                                   |                                                                                      |

**12. Please think back about your last 6 [3: IF Q10\_3 OR Q10\_4=0] female patients with moderate to severe Rheumatoid Arthritis/Crohn’s Disease that were initiated on treatment by you. Which topics did you discuss with these patients?**

Please bear in mind to mention non clinical and non-treatment related topics.

[Question type: Open comment – text]

|                  | Last 3 patients younger than 45 years old [only show if Q10 “Female younger than 45 years old” > 0] | Last 3 patients of 45 years or older [only show if Q10 “Female 45 years or older” > 0] |
|------------------|-----------------------------------------------------------------------------------------------------|----------------------------------------------------------------------------------------|
| Female patient 1 |                                                                                                     |                                                                                        |
| Female patient 2 |                                                                                                     |                                                                                        |
| Female patient 3 |                                                                                                     |                                                                                        |

1  
2  
3 **13. Please think back about your last male patients with moderate to severe Rheumatoid**  
4 **Arthritis/Crohn's Disease that were initiated on treatment by you.**

5  
6 **Other than disease related topics, which of the following topics did you discuss with these**  
7 **patients?.**

8  
9  
10 *[Question type: Multiple response]*

11 *[Randomisation: Yes]*

12  
13  
14  
15 LAST 3 MALE PATIENTS YOUNGER THAN 45 YEARS *[only show if Q10 "Male younger than 45 years*  
16 *old" > 0]*

- 17  
18  
19  
20  
21  
22  
23  
24  
25  
26  
27  
28  
29  
30
- Ability to gain/maintain employment
  - Emotional wellbeing of the patient
  - Social life of the patient
  - Conception / having children
  - Sex life
  - Sports activities
  - Leisure / holiday
  - Independent living of the patient
  - Family life
  - Finances
  - Other (please specify)
  - None of the above

31  
32 LAST 3 MALE PATIENTS OF 45 YEARS OR OLDER *[only show if Q10 "Male 45 years or older" > 0]*

- 33  
34  
35  
36  
37  
38  
39  
40  
41  
42  
43  
44  
45  
46  
47
- Ability to gain/maintain employment
  - Emotional wellbeing of the patient
  - Social life of the patient
  - Conception / having children
  - Sex life
  - Sports activities
  - Leisure / holiday
  - Independent living of the patient
  - Family life
  - Finances
  - Other (please specify)
  - None of the above

48  
49 **14. Below, we have listed the topics you discussed with your last male patients with moderate to**  
50 **severe Rheumatoid Arthritis/Crohn's Disease.**

51  
52 Please select the 5 topics you spent most time on, and rank them by attributing a score between 1  
53 and 5, where 1 indicates the topic you spent most time on.

54  
55 *[PN: Show text before each part of question and adjust number of topics selected when less than 5]*

56  
57 *[Question type: ranking (top 5)]*

1  
2  
3 *Randomisation: Yes]*  
4 *[Filter: only show options selected in Q13]*  
5  
6

7 LAST 3 MALE PATIENTS YOUNGER THAN 45 YEARS (max 5)  
8

- 9  Ability to gain/maintain employment
- 10  Emotional wellbeing of the patient
- 11  Social life of the patient
- 12  Conception / having children
- 13  Sex life
- 14  Sports activities
- 15  Leisure / holiday
- 16  Independent living of the patient
- 17  Family life
- 18  Finances
- 19  Other (please specify)

20  
21 LAST 3 MALE PATIENTS OF 45 YEARS OR OLDER (max 5)  
22

- 23  Ability to gain/maintain employment
- 24  Emotional wellbeing of the patient
- 25  Social life of the patient
- 26  Conception / having children
- 27  Sex life
- 28  Sports activities
- 29  Leisure / holiday
- 30  Independent living of the patient
- 31  Family life
- 32  Finances
- 33  Other (please specify)

34  
35  
36 **15. Please think of your last male patient with whom you discussed conception / having children.**  
37

38 **Who initiated this discussion on conception / having children?**  
39

40 *[Question type: Single response]*  
41

42 *[Filter: only show if "Conception / having children" is selected in Q0]*  
43

- 44  I initiated this discussion
- 45  The patient initiated this discussion
- 46  I don't remember who initiated this discussion
- 47
- 48
- 49
- 50
- 51
- 52
- 53
- 54
- 55
- 56
- 57
- 58
- 59
- 60

1  
2  
3 **16. Please think back about your last female patients with moderate to severe Rheumatoid**  
4 **Arthritis/Crohn's Disease that were initiated on treatment by you.**

5  
6 **Other than disease related topics, which of the following topics did you discuss with these**  
7 **patients?**

8  
9  
10 *[Question type: Multiple response]*

11 *[Randomisation: Yes]*

12  
13  
14  
15 LAST 3 FEMALE PATIENTS YOUNGER THAN 45 YEARS *[only show if Q10 "Female younger than 45*  
16 *years old" > 0]*

- 17  
18  Ability to gain/maintain employment  
19  Emotional wellbeing of the patient  
20  Social life of the patient  
21  Conception / having children  
22  Sex life  
23  Sports activities  
24  Leisure / holiday  
25  Independent living of the patient  
26  Family life  
27  Finances  
28  Other (please specify)  
29  None of the above

30  
31 LAST 3 FEMALE PATIENTS OF 45 YEARS OR OLDER *[only show if Q10 "Female 45 years or older" > 0]*

- 32  
33  Ability to gain/maintain employment  
34  Emotional wellbeing of the patient  
35  Social life of the patient  
36  Conception / having children  
37  Sex life  
38  Sports activities  
39  Leisure / holiday  
40  Independent living of the patient  
41  Family life  
42  Finances  
43  Other (please specify)  
44  None of the above

45  
46  
47  
48 **17. Below, we have listed the topics you discussed with your last female patients with moderate**  
49 **to severe Rheumatoid Arthritis/Crohn's Disease.**

50  
51  
52 **Please select the 5 topics you spent most time on, and rank them by attributing a score between 1**  
53 **and 5, where 1 indicates the topic you spent most time on.**

54  
55 *[PN: Show text before each part of question and adjust number of topics selected when less than 5]*

56  
57 *[Question type: ranking (top 5)]*

1  
2  
3 *[Randomisation: Yes]*

4 *[Filter: only show options selected in Q16]*

5  
6  
7 LAST 3 FEMALE PATIENTS YOUNGER THAN 45 YEARS (max 5)

- 8  
9  Ability to gain/maintain employment
- 10  Emotional wellbeing of the patient
- 11  Social life of the patient
- 12  Conception / having children
- 13  Sex life
- 14  Sports activities
- 15  Leisure / holiday
- 16  Independent living of the patient
- 17  Family life
- 18  Finances
- 19  Other (please specify)

20  
21 LAST 3 PATIENTS OF 45 YEARS OR OLDER (max 5)

- 22  
23  Ability to gain/maintain employment
- 24  Emotional wellbeing of the patient
- 25  Social life of the patient
- 26  Conception / having children
- 27  Sex life
- 28  Sports activities
- 29  Leisure / holiday
- 30  Independent living of the patient
- 31  Family life
- 32  Finances
- 33  Other (please specify)

34  
35 **18. Please think of your last female patient with whom you discussed conception / having**

36 **children.**

37  
38 **Who initiated this discussion on conception / having children?**

39  
40 *[Question type: Single response]*

41  
42 *[Filter: only show if "Conception / having children" is selected in Q6]*

- 43  
44  I initiated this discussion
- 45  The patient initiated this discussion
- 46  I don't remember who initiated this discussion
- 47  
48  
49  
50  
51  
52  
53  
54  
55  
56  
57  
58  
59  
60

**QUESTIONS REGARDING FPP MANAGEMENT**

In the next chapter, we would like to ask you some questions regarding the Family Planning and Pregnancy management of your patients with moderate to severe Rheumatoid Arthritis/Crohn's Disease.

**19. How often do you consult the following channel(s) in order to look for extra information regarding Family Planning and Pregnancy issues?**

*[Question type: Single response]*

*[Randomise options]*

|                                                                                       | Always                   | Very often               | Sometimes                | Rarely                   | Never                    |
|---------------------------------------------------------------------------------------|--------------------------|--------------------------|--------------------------|--------------------------|--------------------------|
| Congresses/meetings                                                                   | <input type="checkbox"/> |
| Medical Science Liaison (MSL)                                                         | <input type="checkbox"/> |
| Sales representative                                                                  | <input type="checkbox"/> |
| Industry-sponsored symposia or meetings                                               | <input type="checkbox"/> |
| Company websites with disease management education                                    | <input type="checkbox"/> |
| Social media (e.g. Facebook, LinkedIn, Twitter) for your profession (please specify): | <input type="checkbox"/> |
| Other healthcare professionals (peers)                                                | <input type="checkbox"/> |
| Expert opinion blogs (please specify):                                                | <input type="checkbox"/> |
| Physician communities (please specify):                                               | <input type="checkbox"/> |
| KOLs (Key Opinion Leaders)                                                            | <input type="checkbox"/> |
| Online consultation                                                                   | <input type="checkbox"/> |
| Other (please specify):                                                               | <input type="checkbox"/> |

The family planning and/or pregnancy related issues, questions... your patients with moderate to severe Rheumatoid Arthritis/Crohn's Disease could have, might also be relevant for their other treating physicians.

*[Filter: only show if "Conception / having children" is selected in Q0 or Q0]*

**20. To what extent do you discuss these questions, issues... with the patient's GP?**

[Question type: Single response]

[Filter: only show if "Conception / having children" is selected in Q0 or Q0]

|                                         |                          |                          |                          |                                          |
|-----------------------------------------|--------------------------|--------------------------|--------------------------|------------------------------------------|
| 1<br>Never discuss<br>with patient's GP | 2                        | 3                        | 4                        | 5<br>Always discuss<br>with patient's GP |
| <input type="checkbox"/>                | <input type="checkbox"/> | <input type="checkbox"/> | <input type="checkbox"/> | <input type="checkbox"/>                 |

**21. To what extent do you discuss these questions, issues... with the patient's gynaecologist?**

[Question type: Single response]

[Filter: only show if "Conception / having children" is selected in Q0]

|                                                       |                          |                          |                          |                                                        |
|-------------------------------------------------------|--------------------------|--------------------------|--------------------------|--------------------------------------------------------|
| 1<br>Never discuss with<br>patient's<br>gynaecologist | 2                        | 3                        | 4                        | 5<br>Always discuss<br>with patient's<br>gynaecologist |
| <input type="checkbox"/>                              | <input type="checkbox"/> | <input type="checkbox"/> | <input type="checkbox"/> | <input type="checkbox"/>                               |



**Appendix 2****Patient Survey Questionnaire**

1. Please specify the country where you live:

- United States
- United Kingdom
- France
- Italy
- Germany
- Spain
- Other (OUT)

2. Please specify your gender:

- Male (OUT)
- Female

3. Please specify your age:

- Under 20 years (OUT)
- 20-24 years
- 25-29 years
- 30-34 years
- 35-39 years
- 40-45 years
- Over 45 years (OUT)

1  
2  
3 4. How many children have you given birth to?  
4  
5

- 6 • None
- 7 • One
- 8 • Two
- 9 • Three
- 10 • Four
- 11 • Five or more

12  
13  
14  
15  
16  
17  
18 5. Do you have an immunological condition? If so, which one? (If you have more  
19 than one of these conditions, tick the one that is most prominent)  
20

- 21 • Rheumatoid arthritis
- 22 • Systemic lupus
- 23 • Crohn's disease
- 24 • Ulcerative colitis
- 25 • Axial spondyloarthritis
- 26 • Psoriatic arthritis
- 27 • None (OUT)
- 28 • Other (OUT)

29  
30  
31  
32  
33  
34  
35  
36  
37  
38  
39 6. Are you currently taking any medication for your condition?  
40

- 41 • Yes
  - 42 • No
- 43  
44  
45  
46  
47  
48  
49  
50  
51  
52  
53  
54  
55  
56  
57  
58  
59  
60

1  
2  
3 Next, we would like to ask you a few questions around your visits to your doctor.  
4

5 7. Which doctor(s) did you visit during the last two years for your condition? (please  
6 tick all that apply)  
7

- 8 • GP
- 9 • Gynaecologist
- 10 • Rheumatologist
- 11 • Gastroenterologist
- 12 • Immunologist
- 13 • Dermatologist
- 14 • Other

15  
16  
17  
18  
19  
20  
21  
22 8. During any of your last three medical appointments, did you discuss any of the  
23 following topics in relation to your condition? (please tick all that apply)  
24

- 25 • Employment
- 26 • Emotional wellbeing
- 27 • Social life
- 28 • Having children/pregnancy [if ticked, option 9 of Q11 was hidden]
- 29 • Sex life
- 30 • Sports activities
- 31 • Leisure/holiday
- 32 • Independent living
- 33 • Family life
- 34 • Finances

1  
2  
3 Finally, we would like to ask you about family planning (having children), and how you  
4  
5 discuss this during your medical appointment.  
6

7 9. Are you considering having a child/another child?

- 8 • Yes
- 9 • No

10  
11  
12 10. Do you consider your condition a point of concern for family planning (i.e. for  
13 your plans of having another child)?

- 14 • Yes
- 15 • No

16  
17  
18 11. Have you ever discussed your concerns around your condition and family  
19 planning with a healthcare professional (specialist, GP or nurse)? (please tick all  
20 that apply)

- 21 • Yes, with my GP
- 22 • Yes, with my gynaecologist
- 23 • Yes, with my paediatrician
- 24 • Yes, with my rheumatologist
- 25 • Yes, with my gastroenterologist
- 26 • Yes, with my immunologist
- 27 • Yes, with my dermatologist
- 28 • Yes, with a nurse
- 29 • No, I haven't discussed this [this option will not appear if FPP is ticked in  
30 Q8; if ticked only Q16-23 subsequently shown]
- 31 • Other

1  
2  
3 12. When was the last time you discussed your concerns around your condition and  
4  
5 family planning with a healthcare professional (specialist, GP or nurse)?  
6

- 7 • Less than six months ago
- 8
- 9 • Between six months and two years ago
- 10
- 11 • More than two years ago
- 12
- 13 • Don't remember
- 14

15  
16 13. Over the last five years, how frequently did you have a discussion on your  
17  
18 concerns around your condition and family planning with a healthcare  
19  
20 professional (specialist, GP or nurse)?  
21

- 22 • Every visit
- 23
- 24 • Most visits
- 25
- 26 • Occasionally, during some visits
- 27
- 28 • Just once
- 29
- 30 • Never
- 31
- 32 • Don't remember
- 33
- 34

35 14. Who initiated the last discussion around your condition and family planning?  
36

- 37 • I did
- 38
- 39 • The doctor or nurse did
- 40
- 41 • Don't remember
- 42

43 15. To what extent did that discussion settle concerns? (please rate on a scale from  
44  
45 0 to 10 where 0 = no, the discussion didn't settle my concerns at all, and 10 =  
46  
47 yes, the discussion completely settle my concerns)  
48  
49  
50  
51  
52  
53  
54  
55  
56  
57  
58  
59  
60

1  
2  
3 16. Do you intend to make family planning a discussion point during your next  
4  
5 medical appointment? (omitted in UK)  
6

- 7 • Yes, definitely
- 8
- 9 • Yes, probably
- 10
- 11 • Maybe
- 12
- 13 • No, probably not
- 14
- 15 • No, definitely not
- 16

17  
18 *Additional questions for Phase 2 questionnaire*  
19

20 17. Which of the issues listed below prevented you from discussing your concerns  
21  
22 around your condition and family planning during your medical appointments?  
23  
24 (maximum 2)  
25

- 26 • Not enough time on behalf of my doctor or other healthcare professional
- 27
- 28 • I forgot to bring up my concerns
- 29
- 30 • I feel the healthcare professionals I am seeing are unable to help me here
- 31
- 32 • The healthcare professionals I am seeing are reluctant to enter into this
- 33 discussion
- 34
- 35 • I am very worried that bringing up my concerns will trigger a change in
- 36 my medication, which will make symptoms worse
- 37
- 38 • Other
- 39
- 40
- 41
- 42
- 43
- 44
- 45
- 46
- 47
- 48
- 49
- 50
- 51
- 52
- 53
- 54
- 55
- 56
- 57
- 58
- 59
- 60

1  
2  
3 18. What type of healthcare professional (specialist, GP or nurse) are you primarily  
4  
5 seeing in relation to your condition? (only 1 allowed)  
6

- 7 • GP
- 8
- 9 • Gynaecologist
- 10
- 11 • Paediatrician
- 12
- 13 • Rheumatologist
- 14
- 15 • Gastroenterologist
- 16
- 17 • Immunologist
- 18
- 19 • Dermatologist
- 20
- 21 • Nurse
- 22
- 23 • Other
- 24
- 25

26  
27 19. What type of healthcare professional (specialist, GP or nurse) are you primarily  
28  
29 seeing in relation to family planning and pregnancy? (only 1 allowed)  
30

- 31 • GP
- 32
- 33 • Gynaecologist
- 34
- 35 • Paediatrician
- 36
- 37 • Rheumatologist
- 38
- 39 • Gastroenterologist
- 40
- 41 • Immunologist
- 42
- 43 • Dermatologist
- 44
- 45 • Nurse
- 46
- 47 • Other
- 48
- 49

50 20. If you discussed your concerns around family planning and your condition with  
51  
52 several healthcare professionals (specialists, GP or nurse), how consistent would  
53  
54 you say the answers were? (please rate on a scale from 0 to 10 where 0 = the  
55  
56 answers were not consistent at all, and 10 = the answers were very consistent)  
57  
58  
59  
60

1  
2  
3 21. Which channels are you using to find information about family planning as  
4  
5 impacted by your condition? (please tick all that apply)  
6

- 7 • Family and friends
- 8
- 9 • Fellow patients
- 10
- 11 • Other pregnant women and mothers
- 12
- 13 • Twitter
- 14
- 15 • Facebook
- 16
- 17 • Specific condition related websites
- 18
- 19 • Specific pregnancy related websites
- 20
- 21 • Health blogs
- 22
- 23 • Specific condition related forums (online)
- 24
- 25 • Specific pregnancy related forums (online)
- 26
- 27 • TV
- 28
- 29 • Magazines or e-magazines
- 30
- 31 • Books or e-books
- 32
- 33 • DVDs/CDs
- 34
- 35 • Patient organisations
- 36
- 37 • Radio
- 38
- 39 • Health and wellness clubs
- 40
- 41 • Religious groups
- 42
- 43 • Condition related groups (not online)
- 44
- 45 • Other
- 46
- 47
- 48
- 49
- 50
- 51
- 52
- 53
- 54
- 55
- 56
- 57
- 58
- 59
- 60



1  
2  
3 22. Which channels are you using to engage (comment, discuss, post, share, like) in  
4 discussions around family planning as impacted by your condition? (please tick all  
5 that apply)  
6  
7  
8

- 9 • Family and friends
- 10
- 11 • Fellow patients
- 12
- 13 • Other pregnant women and mothers
- 14
- 15 • Twitter
- 16
- 17 • Facebook
- 18
- 19 • Specific condition related websites
- 20
- 21 • Specific pregnancy related websites
- 22
- 23 • Health blogs
- 24
- 25 • Specific condition related forums (online)
- 26
- 27 • Specific pregnancy related forums (online)
- 28
- 29 • Patient organisations
- 30
- 31 • Health and wellness clubs
- 32
- 33 • Religious groups
- 34
- 35 • Condition related groups (not online)
- 36
- 37 • Other
- 38
- 39
- 40
- 41
- 42
- 43
- 44
- 45
- 46
- 47
- 48
- 49
- 50
- 51
- 52
- 53
- 54
- 55
- 56
- 57
- 58
- 59
- 60

1  
2  
3 23. What is in your opinion the best way to bring up the topic of family planning and  
4  
5 your condition during a medical appointment?  
6

- 7
- 8 • I would like a healthcare professional (specialist, GP or nurse) to initiate  
9 the discussion  
10
  - 11 • I would like a healthcare professional (specialist, GP or nurse) to provide  
12 me with some informational materials about family planning and my  
13 condition  
14
  - 15 • I would prefer to initiate the discussion myself  
16
  - 17 • I would prefer not to have such discussion [GO TO END]  
18
  - 19 • Other [GO TO END]  
20
- 21  
22  
23

24 24. How often would you like the topic of family planning be brought up during your  
25  
26 medical appointments?  
27

- 28
- 29 • Once is enough  
30
  - 31 • At every visit  
32
  - 33 • When changing my medication  
34
  - 35 • When taking decisions that could have an impact on my family planning  
36
  - 37 • Regularly, at least once a year  
38
  - 39 • Every time when my condition is stable enough to become pregnant  
40
- 41  
42  
43  
44  
45  
46  
47  
48  
49  
50  
51  
52  
53  
54  
55  
56  
57  
58  
59  
60
