# Supplementary material for: Family planning and pregnancy issues for women with systemic inflammatory diseases: patient and physician perspectives
Source: HighWire-hosted journal article supplement (doi:10.1136/bmjopen-2013-004081), 2014-02-01
Supplement: bmjopen-2013-004081supp.pdf [file bmjopen-2013-004081supp.pdf]

## Appendix 1

### Physician Survey Questionnaire

#### Overview – survey flow

1. Participant profiling and screening
2. Implicit measurement of impact FPP
3. Communication testing
4. Explicit measurement of FPP related conversations

Thank you for your interest in our study. Before we begin, we would like to assure you that we act in accordance with the ESOMAR, EphMRA, ABPI, MRS and BHBIA codes of conduct regarding anonymity and confidentiality.

Any information you disclose will be treated in the strictest confidence and the results are pooled so none of the answers are attributable to individual respondents.

First we would like to ask you a few qualifying questions. This will take less than 1 minute. The questionnaire takes some 20 minutes to complete and covers the domain of Rheumatoid Arthritis/Crohn's Disease.

The market research is being conducted on behalf of a pharmaceutical company. The market research study itself is strictly non-promotional. The company commissioning this research has no access whatsoever to information regarding respondents.

If you have any problems or questions filling out this questionnaire, please feel free to contact us at [support@leadphysician.com](mailto:support@leadphysician.com).

☐ I hereby agree to proceed with the questionnaire on this basis. **STOP if not selected**

The participant should agree to treat with the utmost confidentiality all data and information to which he is made privy in light of and/or as a result of his participation in this study.

The participant expressly guarantees that he will not divulge said information or data, nor will third parties be granted access. He will not publish or reproduce the information, nor will he exploit it in any other way.

Only public information or information that the participant may also obtain via other legitimate means than through participation in this study are not subject to this obligation of confidentiality.

This obligation is irrevocable and remains in effect as long as the information is to be considered confidential and has, therefore, not been made public by the authorized party or parties.

- ☐ Yes, I expressly and unconditionally accept the above obligation of confidentiality.  
**STOP if not selected**

ADVERSE EVENT REPORTING: We have been asked to provide our client with details of adverse events divulged during the course of this market research. Although this is an online survey and the information you provide will of course be treated in confidence, we are still under an obligation to report any information on adverse events in specific patients, even if you have already reported said event to the company or the regulatory authorities. In this case you will be contacted with a request to waive the confidentiality provided under the market research codes of conduct specifically for this particular adverse event. All other information you provide during the course of the survey will remain confidential.

- ☐ I hereby confirm to have been informed that the organiser of the survey is under the obligation to collect and report all information on adverse events linked to the client's product as recorded by me during the course of this research. **STOP if not selected**

*[Parameters to be recorded from panel database:]*

- Age
- Gender
- Region
- No Clinical investigation or pharmaco/biotech manufacturer (not in US)]

## **PARTICIPANT PROFILING AND SCREENING**

### **1. What is your primary specialty?**

Question type: Single response

- |                                                                            |                |                     |
|----------------------------------------------------------------------------|----------------|---------------------|
| <input type="checkbox"/> Gastroenterology                                  | (US only)      | =GASTROENTEROLOGIST |
| <input type="checkbox"/> Rheumatology                                      |                | = RHEUMATOLOGIST    |
| <input type="checkbox"/> Internal medicine specialized in rheumatology     | (Germany only) | = RHEUMATOLOGIST    |
| <input type="checkbox"/> Internal medicine not specialized in rheumatology | (Germany only) | <b>STOP</b>         |
| <input type="checkbox"/> Other specialty                                   |                | <b>STOP</b>         |

*[Gastroenterologists get questions personalized to Crohn's Disease, Rheumatologists to Rheumatoid Arthritis.]*

### **2. How long have you been IN PRACTICE since qualifying as a specialist?**

*[Question type: Open comment - numeric]*

*Max score allowed: 50 ("Years" - next to box)]*

**[If < 3 or > 30 => STOP]**

### **3. What percent of your working time is dedicated to treating patients?**

*[Question type: Open comment - numeric*

*0 to 100%]*

% is dedicated to treating patients      **[STOP if less than 50%]**

**4. In an average month, approximately how many different patients do you see for all disorders and conditions and for whom you are personally involved in making treatment decisions? Please count each patient once, not the number of visits.**

*[Question type: Open comment - numeric*

*Max score allowed: 1000]*

*[STOP if <20]*

**5. In an average month, approximately how many different patients do you see for Rheumatoid Arthritis (for Rheumatologists)/ Crohn's Disease (for Gastroenterologists) and for whom you are personally involved in making treatment decisions? Please count each patient once, not the number of visits.**

*[Question type: Open comment - numeric*

*Max score allowed: number at S4*

*Number needs to be lower or equal than in previous question.]*

*[STOP if < 20 RA patients or < 8 CD patients ]*

6. In an average month, approximately how many different patients with Rheumatoid Arthritis (for Rheumatologists)/ Crohn's Disease (for Gastroenterologists) do you see that are on biologic treatment?

[Question type: Open comment - numeric]

Max score allowed: Number in S5

Number needs to be lower or equal than in previous question]

[STOP if < 10 RA patients or < 2 CD patients]

7. What type of practice do you have? (tick only one)

[Question type: Single response]

- ☐ Office only [STOP in France]
- ☐ Hospital only
- ☐ Office and hospital [(don't show in Germany)]

8. What is the size of hospital where you carry out your regular practice?

[Question type: Single response]

[Show only if 'hospital' or 'office and hospital' was selected in q0]

- ☐ More than 700 beds
- ☐ 400 to 700 beds
- ☐ Less than 400 beds

9. Have you taken part in a market research study in the area of Rheumatoid Arthritis (for Rheumatologists)/ Crohn's Disease (for Gastroenterologists) in the last month?

[Question type: Single response]

- ☐ Yes [STOP]
- ☐ No

10. What percentage of your Rheumatoid Arthritis/Crohn's Disease patient base can be attributed to the following categories?

[Question type: Open comment - numeric]

Should add up to 100%

|                                  |   |
|----------------------------------|---|
| Male younger than 45 years old   | % |
| Male 45 years or older           | % |
| Female younger than 45 years old | % |
| Female 45 years or older         | % |

## **IMPLICIT MEASUREMENT OF IMPACT FPP**

In the following questions we would like to talk about the topics you discussed with your moderate to severe Rheumatoid Arthritis/Crohn's Disease patients.

Obviously, most of the conversations are about clinical topics, but from now on we would like you to think about **non clinical nor treatment related topics**.

**11. Please think back about your last 6 [3: IF Q10\_1 OR Q10\_2=0] male patients with moderate to severe Rheumatoid Arthritis/Crohn's Disease that were initiated on treatment by you. Which topics did you discuss with these patients?**

Please bear in mind to mention non clinical and non-treatment related topics.

[Question type: Open comment – text]

|                | Last 3 patients younger than 45 years old [only show if Q10 "Male younger than 45 years old" > 0] | Last 3 patients of 45 years or older [only show if Q10 "Male 45 years or older" > 0] |
|----------------|---------------------------------------------------------------------------------------------------|--------------------------------------------------------------------------------------|
| Male patient 1 |                                                                                                   |                                                                                      |
| Male patient 2 |                                                                                                   |                                                                                      |
| Male patient 3 |                                                                                                   |                                                                                      |

**12. Please think back about your last 6 [3: IF Q10\_3 OR Q10\_4=0] female patients with moderate to severe Rheumatoid Arthritis/Crohn's Disease that were initiated on treatment by you. Which topics did you discuss with these patients?**

Please bear in mind to mention non clinical and non-treatment related topics.

[Question type: Open comment – text]

|                  | Last 3 patients younger than 45 years old [only show if Q10 "Female younger than 45 years old" > 0] | Last 3 patients of 45 years or older [only show if Q10 "Female 45 years or older" > 0] |
|------------------|-----------------------------------------------------------------------------------------------------|----------------------------------------------------------------------------------------|
| Female patient 1 |                                                                                                     |                                                                                        |
| Female patient 2 |                                                                                                     |                                                                                        |
| Female patient 3 |                                                                                                     |                                                                                        |

**13. Please think back about your last male patients with moderate to severe Rheumatoid Arthritis/Crohn's Disease that were initiated on treatment by you.**

**Other than disease related topics, which of the following topics did you discuss with these patients?.**

*[Question type: Multiple response]*

*[Randomisation: Yes]*

LAST 3 MALE PATIENTS YOUNGER THAN 45 YEARS *[only show if Q10 "Male younger than 45 years old" > 0]*

- ☐ Ability to gain/maintain employment
- ☐ Emotional wellbeing of the patient
- ☐ Social life of the patient
- ☐ Conception / having children
- ☐ Sex life
- ☐ Sports activities
- ☐ Leisure / holiday
- ☐ Independent living of the patient
- ☐ Family life
- ☐ Finances
- ☐ Other (please specify)
- ☐ None of the above

LAST 3 MALE PATIENTS OF 45 YEARS OR OLDER *[only show if Q10 "Male 45 years or older" > 0]*

- ☐ Ability to gain/maintain employment
- ☐ Emotional wellbeing of the patient
- ☐ Social life of the patient
- ☐ Conception / having children
- ☐ Sex life
- ☐ Sports activities
- ☐ Leisure / holiday
- ☐ Independent living of the patient
- ☐ Family life
- ☐ Finances
- ☐ Other (please specify)
- ☐ None of the above

**14. Below, we have listed the topics you discussed with your last male patients with moderate to severe Rheumatoid Arthritis/Crohn's Disease.**

Please select the 5 topics you spent most time on, and rank them by attributing a score between 1 and 5, where 1 indicates the topic you spent most time on.

*[PN: Show text before each part of question and adjust number of topics selected when less than 5]*

*[Question type: ranking (top 5)]*

*Randomisation: Yes]*

*[Filter: only show options selected in Q13]*

LAST 3 MALE PATIENTS YOUNGER THAN 45 YEARS (max 5)

- ☐ Ability to gain/maintain employment
- ☐ Emotional wellbeing of the patient
- ☐ Social life of the patient
- ☐ Conception / having children
- ☐ Sex life
- ☐ Sports activities
- ☐ Leisure / holiday
- ☐ Independent living of the patient
- ☐ Family life
- ☐ Finances
- ☐ Other (please specify)

LAST 3 MALE PATIENTS OF 45 YEARS OR OLDER (max 5)

- ☐ Ability to gain/maintain employment
- ☐ Emotional wellbeing of the patient
- ☐ Social life of the patient
- ☐ Conception / having children
- ☐ Sex life
- ☐ Sports activities
- ☐ Leisure / holiday
- ☐ Independent living of the patient
- ☐ Family life
- ☐ Finances
- ☐ Other (please specify)

**15. Please think of your last male patient with whom you discussed conception / having children.**

**Who initiated this discussion on conception / having children?**

*[Question type: Single response]*

*[Filter: only show if "Conception / having children" is selected in Q0]*

- ☐ I initiated this discussion
- ☐ The patient initiated this discussion
- ☐ I don't remember who initiated this discussion

**16. Please think back about your last female patients with moderate to severe Rheumatoid Arthritis/Crohn's Disease that were initiated on treatment by you.**

**Other than disease related topics, which of the following topics did you discuss with these patients?**

*[Question type: Multiple response]*

*[Randomisation: Yes]*

LAST 3 FEMALE PATIENTS YOUNGER THAN 45 YEARS *[only show if Q10 "Female younger than 45 years old" > 0]*

- ☐ Ability to gain/maintain employment
- ☐ Emotional wellbeing of the patient
- ☐ Social life of the patient
- ☐ Conception / having children
- ☐ Sex life
- ☐ Sports activities
- ☐ Leisure / holiday
- ☐ Independent living of the patient
- ☐ Family life
- ☐ Finances
- ☐ Other (please specify)
- ☐ None of the above

LAST 3 FEMALE PATIENTS OF 45 YEARS OR OLDER *[only show if Q10 "Female 45 years or older" > 0]*

- ☐ Ability to gain/maintain employment
- ☐ Emotional wellbeing of the patient
- ☐ Social life of the patient
- ☐ Conception / having children
- ☐ Sex life
- ☐ Sports activities
- ☐ Leisure / holiday
- ☐ Independent living of the patient
- ☐ Family life
- ☐ Finances
- ☐ Other (please specify)
- ☐ None of the above

**17. Below, we have listed the topics you discussed with your last female patients with moderate to severe Rheumatoid Arthritis/Crohn's Disease.**

**Please select the 5 topics you spent most time on, and rank them by attributing a score between 1 and 5, where 1 indicates the topic you spent most time on.**

*[PN: Show text before each part of question and adjust number of topics selected when less than 5]*

*[Question type: ranking (top 5)]*

*[Randomisation: Yes]*

*[Filter: only show options selected in Q16]*

LAST 3 FEMALE PATIENTS YOUNGER THAN 45 YEARS (max 5)

- ☐ Ability to gain/maintain employment
- ☐ Emotional wellbeing of the patient
- ☐ Social life of the patient
- ☐ Conception / having children
- ☐ Sex life
- ☐ Sports activities
- ☐ Leisure / holiday
- ☐ Independent living of the patient
- ☐ Family life
- ☐ Finances
- ☐ Other (please specify)

LAST 3 PATIENTS OF 45 YEARS OR OLDER (max 5)

- ☐ Ability to gain/maintain employment
- ☐ Emotional wellbeing of the patient
- ☐ Social life of the patient
- ☐ Conception / having children
- ☐ Sex life
- ☐ Sports activities
- ☐ Leisure / holiday
- ☐ Independent living of the patient
- ☐ Family life
- ☐ Finances
- ☐ Other (please specify)

**18. Please think of your last female patient with whom you discussed conception / having children.**

**Who initiated this discussion on conception / having children?**

*[Question type: Single response]*

*[Filter: only show if "Conception / having children" is selected in Q6]*

- ☐ I initiated this discussion
- ☐ The patient initiated this discussion
- ☐ I don't remember who initiated this discussion

## **QUESTIONS REGARDING FPP MANAGEMENT**

In the next chapter, we would like to ask you some questions regarding the Family Planning and Pregnancy management of your patients with moderate to severe Rheumatoid Arthritis/Crohn's Disease.

**19. How often do you consult the following channel(s) in order to look for extra information regarding Family Planning and Pregnancy issues?**

*[Question type: Single response]*

*[Randomise options]*

|                                                                                       | Always                   | Very often               | Sometimes                | Rarely                   | Never                    |
|---------------------------------------------------------------------------------------|--------------------------|--------------------------|--------------------------|--------------------------|--------------------------|
| Congresses/meetings                                                                   | <input type="checkbox"/> |
| Medical Science Liaison (MSL)                                                         | <input type="checkbox"/> |
| Sales representative                                                                  | <input type="checkbox"/> |
| Industry-sponsored symposia or meetings                                               | <input type="checkbox"/> |
| Company websites with disease management education                                    | <input type="checkbox"/> |
| Social media (e.g. Facebook, LinkedIn, Twitter) for your profession (please specify): | <input type="checkbox"/> |
| Other healthcare professionals (peers)                                                | <input type="checkbox"/> |
| Expert opinion blogs (please specify):                                                | <input type="checkbox"/> |
| Physician communities (please specify):                                               | <input type="checkbox"/> |
| KOLs (Key Opinion Leaders)                                                            | <input type="checkbox"/> |
| Online consultation                                                                   | <input type="checkbox"/> |
| Other (please specify):                                                               | <input type="checkbox"/> |

The family planning and/or pregnancy related issues, questions... your patients with moderate to severe Rheumatoid Arthritis/Crohn's Disease could have, might also be relevant for their other treating physicians.

*[Filter: only show if "Conception / having children" is selected in Q0 or Q0]*

**20. To what extent do you discuss these questions, issues... with the patient's GP?**

*[Question type: Single response]*

*[Filter: only show if "Conception / having children" is selected in Q0 or Q0]*

|                                         |                          |                          |                          |                                          |
|-----------------------------------------|--------------------------|--------------------------|--------------------------|------------------------------------------|
| 1<br>Never discuss<br>with patient's GP | 2                        | 3                        | 4                        | 5<br>Always discuss<br>with patient's GP |
| <input type="checkbox"/>                | <input type="checkbox"/> | <input type="checkbox"/> | <input type="checkbox"/> | <input type="checkbox"/>                 |

**21. To what extent do you discuss these questions, issues... with the patient's gynaecologist?**

*[Question type: Single response]*

*[Filter: only show if "Conception / having children" is selected in Q0]*

|                                                       |                          |                          |                          |                                                        |
|-------------------------------------------------------|--------------------------|--------------------------|--------------------------|--------------------------------------------------------|
| 1<br>Never discuss with<br>patient's<br>gynaecologist | 2                        | 3                        | 4                        | 5<br>Always discuss<br>with patient's<br>gynaecologist |
| <input type="checkbox"/>                              | <input type="checkbox"/> | <input type="checkbox"/> | <input type="checkbox"/> | <input type="checkbox"/>                               |

## **Appendix 2**

### **Patient Survey Questionnaire**

1. Please specify the country where you live:

- United States
- United Kingdom
- France
- Italy
- Germany
- Spain
- Other (OUT)

2. Please specify your gender:

- Male (OUT)
- Female

3. Please specify your age:

- Under 20 years (OUT)
- 20-24 years
- 25-29 years
- 30-34 years
- 35-39 years
- 40-45 years
- Over 45 years (OUT)

4. How many children have you given birth to?

- None
- One
- Two
- Three
- Four
- Five or more

5. Do you have an immunological condition? If so, which one? (If you have more than one of these conditions, tick the one that is most prominent)

- Rheumatoid arthritis
- Systemic lupus
- Crohn's disease
- Ulcerative colitis
- Axial spondyloarthritis
- Psoriatic arthritis
- None (OUT)
- Other (OUT)

6. Are you currently taking any medication for your condition?

- Yes
- No

Next, we would like to ask you a few questions around your visits to your doctor.

7. Which doctor(s) did you visit during the last two years for your condition? (please tick all that apply)

- GP
- Gynaecologist
- Rheumatologist
- Gastroenterologist
- Immunologist
- Dermatologist
- Other

8. During any of your last three medical appointments, did you discuss any of the following topics in relation to your condition? (please tick all that apply)

- Employment
- Emotional wellbeing
- Social life
- Having children/pregnancy [if ticked, option 9 of Q11 was hidden]
- Sex life
- Sports activities
- Leisure/holiday
- Independent living
- Family life
- Finances

Finally, we would like to ask you about family planning (having children), and how you discuss this during your medical appointment.

9. Are you considering having a child/another child?

- Yes
- No

10. Do you consider your condition a point of concern for family planning (i.e. for your plans of having another child)?

- Yes
- No

11. Have you ever discussed your concerns around your condition and family planning with a healthcare professional (specialist, GP or nurse)? (please tick all that apply)

- Yes, with my GP
- Yes, with my gynaecologist
- Yes, with my paediatrician
- Yes, with my rheumatologist
- Yes, with my gastroenterologist
- Yes, with my immunologist
- Yes, with my dermatologist
- Yes, with a nurse
- No, I haven't discussed this [this option will not appear if FPP is ticked in Q8; if ticked only Q16-23 subsequently shown]
- Other

12. When was the last time you discussed your concerns around your condition and family planning with a healthcare professional (specialist, GP or nurse)?

- Less than six months ago
- Between six months and two years ago
- More than two years ago
- Don't remember

13. Over the last five years, how frequently did you have a discussion on your concerns around your condition and family planning with a healthcare professional (specialist, GP or nurse)?

- Every visit
- Most visits
- Occasionally, during some visits
- Just once
- Never
- Don't remember

14. Who initiated the last discussion around your condition and family planning?

- I did
- The doctor or nurse did
- Don't remember

15. To what extent did that discussion settle concerns? (please rate on a scale from 0 to 10 where 0 = no, the discussion didn't settle my concerns at all, and 10 = yes, the discussion completely settle my concerns)

16. Do you intend to make family planning a discussion point during your next medical appointment? (omitted in UK)

- Yes, definitely
- Yes, probably
- Maybe
- No, probably not
- No, definitely not

*Additional questions for Phase 2 questionnaire*

17. Which of the issues listed below prevented you from discussing your concerns around your condition and family planning during your medical appointments?  
(maximum 2)

- Not enough time on behalf of my doctor or other healthcare professional
- I forgot to bring up my concerns
- I feel the healthcare professionals I am seeing are unable to help me here
- The healthcare professionals I am seeing are reluctant to enter into this discussion
- I am very worried that bringing up my concerns will trigger a change in my medication, which will make symptoms worse
- Other

18. What type of healthcare professional (specialist, GP or nurse) are you primarily seeing in relation to your condition? (only 1 allowed)

- GP
- Gynaecologist
- Paediatrician
- Rheumatologist
- Gastroenterologist
- Immunologist
- Dermatologist
- Nurse
- Other

19. What type of healthcare professional (specialist, GP or nurse) are you primarily seeing in relation to family planning and pregnancy? (only 1 allowed)

- GP
- Gynaecologist
- Paediatrician
- Rheumatologist
- Gastroenterologist
- Immunologist
- Dermatologist
- Nurse
- Other

20. If you discussed your concerns around family planning and your condition with several healthcare professionals (specialists, GP or nurse), how consistent would you say the answers were? (please rate on a scale from 0 to 10 where 0 = the answers were not consistent at all, and 10 = the answers were very consistent)

21. Which channels are you using to find information about family planning as impacted by your condition? (please tick all that apply)

- Family and friends
- Fellow patients
- Other pregnant women and mothers
- Twitter
- Facebook
- Specific condition related websites
- Specific pregnancy related websites
- Health blogs
- Specific condition related forums (online)
- Specific pregnancy related forums (online)
- TV
- Magazines or e-magazines
- Books or e-books
- DVDs/CDs
- Patient organisations
- Radio
- Health and wellness clubs
- Religious groups
- Condition related groups (not online)
- Other

22. Which channels are you using to engage (comment, discuss, post, share, like) in discussions around family planning as impacted by your condition? (please tick all that apply)

- Family and friends
- Fellow patients
- Other pregnant women and mothers
- Twitter
- Facebook
- Specific condition related websites
- Specific pregnancy related websites
- Health blogs
- Specific condition related forums (online)
- Specific pregnancy related forums (online)
- Patient organisations
- Health and wellness clubs
- Religious groups
- Condition related groups (not online)
- Other

23. What is in your opinion the best way to bring up the topic of family planning and your condition during a medical appointment?

- I would like a healthcare professional (specialist, GP or nurse) to initiate the discussion
- I would like a healthcare professional (specialist, GP or nurse) to provide me with some informational materials about family planning and my condition
- I would prefer to initiate the discussion myself
- I would prefer not to have such discussion [GO TO END]
- Other [GO TO END]

24. How often would you like the topic of family planning be brought up during your medical appointments?

- Once is enough
- At every visit
- When changing my medication
- When taking decisions that could have an impact on my family planning
- Regularly, at least once a year
- Every time when my condition is stable enough to become pregnant
